# Supplementary material for: Expedient synthesis of tetrahydroquinoline-3-spirohydantoin derivatives via the Lewis acid-catalyzed tert-amino effect reaction
Source: Royal Society of Chemistry journal article supplement (doi:10.1039/c6cc03600g), 2016-01-01

# Expedient Synthesis of Tetrahydroquinoline-3-Spirohydantoin Derivatives *via* Lewis Acid-Catalyzed *tert*-Amino Effect Reaction

John F. Briones and Gregory S. Basarab

*Infection Innovative Medicines Unit, AstraZeneca R&D Boston, 35 Gatehouse Drive, Waltham, Massachusetts 02451, United States*

*Email: Greg.Basarab@uct.ac.za*

## Supporting Information

### Table of Contents

|                                                                                                                          |     |
|--------------------------------------------------------------------------------------------------------------------------|-----|
| 1. General Methods .....                                                                                                 | S2  |
| 2. General procedure for the synthesis of 2-dialkylaminebenzaldehydes <i>via</i> S <sub>N</sub> Ar displacement .....    | S2  |
| 3. General procedure for the Knoevenagel condensation between 2-dialkylaminobenzaldehydes and ethyl nitroacetate .....   | S5  |
| 4. Chemoselectivity study for the T-reaction: General procedure for the Mg(OTf) <sub>2</sub> -catalyzed T-reaction ..... | S6  |
| 5. Procedure for the synthesis of spirohydantoin <b>15</b> .....                                                         | S7  |
| 6. General procedure for the synthesis of spirohydantoins from Knoevenagel adducts .....                                 | S9  |
| 7. Procedure for the synthesis of spirohydantoins <b>23</b> and <i>epi</i> - <b>C3-23</b> .....                          | S10 |
| 8. References .....                                                                                                      | S14 |
| 9. X-ray crystallographic data for <b>5a</b> .....                                                                       | S14 |
| 10. Spectral data and full characterization of spirohydantoin products .....                                             | S22 |
| 11. <sup>1</sup> H and <sup>13</sup> C NMR of the spirohydantoin products .....                                          | S35 |

## 1. General Methods

All of the solvents and reagents used were obtained commercially and used as such unless noted otherwise.  $^1\text{H}$  NMR spectra were recorded in  $\text{CDCl}_3$  or  $\text{DMSO-}d_6$  solutions at 300 K using a Bruker Ultrashield 300 MHz instrument or a Bruker Ultrashield 400 MHz instrument.  $^{13}\text{C}$  NMR spectra were recorded in  $\text{DMSO-}d_6$  solutions at 300 K and 126 MHz using a Bruker DRX-500 500 MHz instrument with a QNP cryoprobe or at 101 MHz using a Bruker Ultrashield 400 MHz instrument or at 75.5 MHz using a Bruker Ultrashield 300 MHz instrument.  $^{19}\text{F}$  NMR spectra were recorded at 282 MHz in  $\text{CDCl}_3$  or  $\text{DMSO-}d_6$  solutions at 300 K using a Bruker Ultrashield 300 MHz instrument. Chemical shifts are reported as parts per million relative to TMS (0.00) for  $^1\text{H}$  and  $^{13}\text{C}$  NMR and  $\text{CFCl}_3$  for  $^{19}\text{F}$  NMR. NMR spectra were processed via Spectrus Processor, ACDLabs. High-resolution mass spectra (HRMS) were obtained using a hybrid quadrupole time-of-flight mass spectrometer (microTOFq II, Bruker Daltonics) in  $\text{ESI}^+$  mode. Silica gel chromatographies were performed on an ISCO Combiflash Companion Instruments using ISCO RediSep<sup>®</sup> Flash Cartridges (particle size: 35-70 microns) or Silacyle SiliaSep<sup>®</sup> Flash Cartridges (particle size: 40-63 microns). All compounds tested possessed a purity of  $\geq 95\%$ . When not indicated, compound intermediates and reagents were purchased from chemical supply houses. Compounds were determined to be greater than 95% pure via analysis by reversed phase UPLC-MS using a Waters Acquity UPLC instrument with DAD and ELSD and a UPLC HSS T3, 2.1 x 30 mm, 1.8  $\mu\text{m}$  column and a gradient of 2 to 98%  $\text{CH}_3\text{CN}$  in water with 0.1% formic acid over 2.0 min at 1 mL/min. Injection volume was 1  $\mu\text{L}$  and the column temperature was 30  $^\circ\text{C}$ . Detection was based on electrospray ionization (ESI) in positive and negative polarity using Waters ZQ mass spectrometer (Milford, MA, USA), diode-array UV detector from 210 to 400 nm, and evaporative light scattering detector (Sedex 75, Sedere, Alfortville Cedex, France). HPLC purification of spirohydantoin were performed using Gilson preparative HPLC with 333/334 pumps, 215 autosampler, and 156 UV/VIS running Trilution 3.0 software using Waters Atlantis T3 19x100mm 5 $\mu\text{m}$  column.

## 2. General procedure for the synthesis of 2- dialkylamino benzaldehydes *via* $\text{S}_\text{n}\text{Ar}$ displacement

To a 250-mL round bottom flask equipped with magnetic stirrer and reflux condenser were added 2-fluorobenzaldehyde (1 equiv), amine (1-5 equiv) and  $\text{K}_2\text{CO}_3$  (1.2-2 equiv). The mixture was suspended in DMF and the resulting mixture was heated to reflux until all the aldehyde has been consumed as determined by UPLC-MS. The reaction was then cooled to rt and quenched with water and extracted with EtOAc 3x. The combined organic layers were washed with brine, dried over  $\text{MgSO}_4$ , filtered, and concentrated *in vacuo*. The crude material

was often pure enough and was used without further purification. Otherwise, pure 2-dialkylaminobenzaldehydes can be obtained *via* purification using automated flash chromatography.

### Representative Aldehyde Examples:

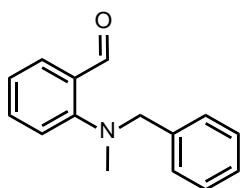

**2-(Benzyl(methyl)amino)benzaldehyde.** To a 500-mL round bottom flask equipped with magnetic stirrer and reflux condenser were added 2-fluorobenzaldehyde (10.0 g, 80.57 mmol), *N*-methyl-1-phenylmethanamine (11.7 g, 96.69 mmol) and K<sub>2</sub>CO<sub>3</sub> (13.5 g, 96.69 mmol). The mixture was suspended in 100 mL DMF and the resulting mixture was heated to reflux until all the aldehyde had been consumed. After 6 h, the reaction was then cooled to rt and quenched with water and extracted with EtOAc 3x. The combined organic layers were washed with brine, dried over MgSO<sub>4</sub>, filtered, and concentrated *in vacuo*. The crude material was eluted through a short silica plug with CH<sub>2</sub>Cl<sub>2</sub> to afford the pure product, 2-(benzyl(methyl)amino)benzaldehyde (18.1 g, >99% yield) as yellow oil. <sup>1</sup>H NMR(400 MHz, CDCl<sub>3</sub>) δ 10.43 (s, 1H), 7.84 (dd, *J*=9.0, 3.0 Hz, 1H), 7.50 (t, *J*=9.0Hz), 7.28-7.35 (m, 5H), 7.12 (t, 2H), 4.36 (s, 2H), 2.84 (s, 3H); <sup>13</sup>C NMR (100 MHz, CDCl<sub>3</sub>) δ 191.2, 155.7, 137.4, 134.7, 130.2, 128.6, 128.0, 127.5, 121.7, 119.6, 62.4, 42.4; HRMS (ES) MH<sup>+</sup> calcd for C<sub>15</sub>H<sub>16</sub>NO 225.1154, found 225.1157.

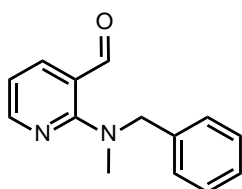

**2-(Benzyl(methyl)amino)nicotinaldehyde.** To a 100-mL round bottom flask equipped with magnetic stirrer and reflux condenser were added 2-fluoronicotinaldehyde (0.969 g, 7.99

mmol), *N*-methyl-1-phenylmethanamine (1.00 g, 7.99 mmol) and K<sub>2</sub>CO<sub>3</sub> (2.21 g, 15.99 mmol). The mixture was suspended in 20 mL DMF and the resulting mixture was heated to reflux until all the aldehyde has been consumed. After 6 h, the reaction was then cooled to rt and quenched with water and extracted with EtOAc 3x. The combined organic layers were washed with brine, dried over MgSO<sub>4</sub>, filtered, and concentrated *in vacuo*. The material was pure enough and was used for next step without further purification affording 2-(benzyl(methyl)amino)nicotinaldehyde (1.81 g, 97%) as yellow oil. <sup>1</sup>H NMR (500 MHz, CDCl<sub>3</sub>) δ 10.03 (s, 1H), 8.38 (d, *J*=5.0 Hz, 1H), 8.02 (d, *J*=5 Hz, 1H), 7.29-7.37 (m, 5H), 6.85 (d, *J*=5.0 Hz, 1H), 4.85 (s, 2H), 3.04 (s, 3H); <sup>13</sup>C NMR (125 MHz, CDCl<sub>3</sub>) δ 189.6, 160.7, 152.4, 141.3, 137.7, 128.7, 127.6, 127.3, 117.5, 114.2, 59.9, 40.5; HRMS (ES) MH<sup>+</sup> calcd for C<sub>14</sub>H<sub>15</sub>N<sub>2</sub>O 227.1140, found 227.1147.

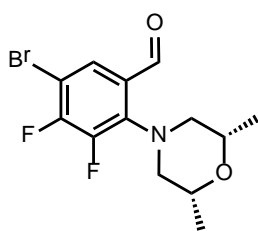

**5-Bromo-2-((2S,6R)-2,6-dimethylmorpholino)-3,4-difluorobenzaldehyde, 50.** To a 250-mL round bottom flask equipped with magnetic stirrer and reflux condenser were added 5-bromo-2,3,4-trifluorobenzaldehyde (1.00 g, 4.18 mmol), *cis*-2,6-dimethylmorpholine (0.497 g, 4.18 mmol) and *N,N*-diisopropylethylamine (0.877 mL, 5.02 mmol). The mixture was suspended in 20 mL CH<sub>3</sub>CN, and the resulting mixture was heated to reflux until all the aldehyde has been consumed. After 5 h, the reaction was then cooled to rt and quenched with water and extracted with EtOAc 3x. The combined organic layers were washed with brine, dried over MgSO<sub>4</sub>, filtered, and concentrated *in vacuo*. The crude material was purified using ISCO (isocratic, 5% hexane/EtOAc) to afford the product 5-bromo-2-((2R,6S)-2,6-dimethylmorpholino)-3,4-difluorobenzaldehyde, **50** (1.00 g, 72% yield) as yellow solid. <sup>1</sup>H NMR (300 MHz, CDCl<sub>3</sub>) δ 10.3 (s, 1H), 7.83 (dd, *J*<sub>FH</sub>=9.0, 3.0 Hz, 1H), 3.84 (m, 2H), 3.04 (m, 4H), 1.23 (d, *J*=9.0 Hz, 6H); <sup>13</sup>C NMR (75 MHz, CDCl<sub>3</sub>) δ 189.6, 154.3 (dd, *J*<sub>CF</sub>=257.3, 14.3 Hz), 150.3 (dd, *J*<sub>CF</sub>=255.0, 13.5 Hz) 142.4, 128.8, 128.1, 105.8, 105.7, 72.2, 58.2, 18.7; <sup>19</sup>F NMR (282 MHz, CDCl<sub>3</sub>) δ -119.0, -141.3; HRMS (ES) MH<sup>+</sup> calcd for C<sub>13</sub>H<sub>15</sub>BrF<sub>2</sub>NO<sub>2</sub> 334.0210, found 334.0700.

### 3. General procedure for the Knoevenagel condensation between 2-dialkylaminobenzaldehydes and ethyl nitroacetate<sup>1</sup>

A mixture of ethyl nitroacetate (1 equiv) and 2-dialkylamino benzaldehyde (1 equiv) in a 250-mL round bottom flask was dissolved in 20 mL anhydrous THF. The resulting solution was cooled to 0 °C using an ice/water bath followed by careful addition of TiCl<sub>4</sub> solution (1M in DCM or toluene, 2 equiv) *via* syringe. After 5 min of stirring, 4-methylmorpholine (4 equiv) was added to the brownish mixture dropwise over 10 min. The reaction was then stirred for additional 4 h; then water was added to quench the reaction. The mixture was extracted with EtOAc 3x, and the combined organic layers were washed with brine, dried over Na<sub>2</sub>SO<sub>4</sub>, filtered and concentrated *in vacuo*. The crude material was purified using ISCO automated flash chromatography with hexane/EtOAc as solvent system.

#### Representative Example: Synthesis of ethyl 3-(2-(benzyl(methyl)amino)phenyl)-2-nitroacrylate, **4**

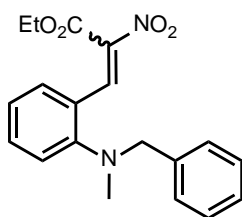

**Ethyl 3-(2-(benzyl(methyl)amino)phenyl)-2-nitroacrylate, **4**.** A mixture of ethyl nitroacetate (0.591 g, 4.44 mmol) and 2-(benzyl(methyl)amino)benzaldehyde (1.00 g, 4.44 mmol) in a 250-mL round bottom flask was dissolved in 20 mL anhydrous THF. The resulting solution was cooled to 0 °C using an ice/water bath followed by careful addition of TiCl<sub>4</sub> solution (1M in DCM) *via* syringe (8.9 mL, 8.88 mmol). After 5 min of stirring, 4-methylmorpholine (1.95 mL, 17.7 mmol) was added to the brownish mixture dropwise over 10 min. The reaction was then stirred for additional 4 h; then water was added to quench the reaction. The mixture was extracted with EtOAc 3x, and the combined organic layers were washed with brine, dried over Na<sub>2</sub>SO<sub>4</sub>, filtered, and concentrated *in vacuo*. The crude material was purified using ISCO automated flash chromatography with hexane/EtOAc as solvent system to afford the product **4** (1.10 g, 73% yield) as orange oil and as a mixture of *E/Z* isomers

(~1.4:1). The material was used for next step as a mixture of regioisomers.  $^1\text{H}$  NMR (500 MHz,  $\text{CDCl}_3$ )  $\delta$  ppm 8.57 (s, 1 H) 8.12 (s, 1 H) 7.25 - 7.45 (m, 21 H) 7.05 - 7.13 (m, 5 H) 4.32 - 4.43 (m, 5 H) 4.18 (s, 5 H) 2.76 (s, 7 H) 1.28 - 1.40 (m, 8 H);  $^{13}\text{C}$  NMR (75 MHz,  $\text{CDCl}_3$ )  $\delta$  189.6, 142.4, 128.8, 128.1, 105.8, 105.7, 72.2, 58.2, 18.7; HRMS (ES) MH $^+$ calcd for  $\text{C}_{19}\text{H}_{19}\text{N}_2\text{O}_4$  339.1350, found 339.2305.

#### 4. Chemoselective study for the T-reaction: General procedure for the $\text{Mg}(\text{OTf})_2$ -catalyzed T-reaction.

A mixture of Knoevenagel adduct (mixture of *E/Z* isomers) and  $\text{Mg}(\text{OTf})_2$  was weighed in a 25-ml one-necked round bottom flask equipped with magnetic stirrer. The mixture was dissolved with 10 mL  $\text{CH}_3\text{CN}$  and the resulting orange solution was heated to reflux until all the starting material has been converted to the T-reaction products. When the conversion was completed (as monitored by UPLC-MS), the reaction was cooled to rt and then concentrated *in vacuo*. Diastereomeric ratio and regioisomeric ratio were determined using  $^1\text{H}$  NMR analysis of the crude mixture.

#### Representative Example: Synthesis of ethyl 1-methyl-3-nitro-2-phenyl-1,2,3,4-tetrahydroquinoline-3-carboxylate, 5

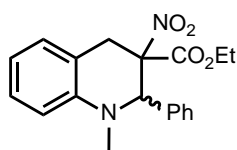

A mixture of Knoevenagel adduct above (0.50 g, 1.47 mmol) and  $\text{Mg}(\text{OTf})_2$  (0.047 g, 0.15 mmol) was weighed in a 25-ml one-necked round bottom flask equipped with magnetic stirrer. The mixture was dissolved with 10 mL  $\text{CH}_3\text{CN}$  and the resulting orange solution was heated to reflux until all the starting material has been converted to the T-reaction products as monitored by UPLC-MS. After ~0.5 h, the reaction was cooled to rt then concentrated *in vacuo*. The adduct was used for next step as a mixture of *E/Z* isomers. Diastereomeric ratio and regioisomeric ratio were determined using  $^1\text{H}$  NMR analysis of the crude mixture. Pure tetrahydroquinoline-nitroester product was obtained after purification using ISCO automated flash chromatography using 20% EtOAc in hexanes as solvent system to afford the product

(0.492 g, 98%) as yellow oil. The oil was re-dissolved in 1:1 hexane/EtOAc and the major diastereomer crystallized quickly to afford the pure tetrahydroquinoline nitroester **5a** (57% yield after recrystallization). The structure of **5a** was confirmed by X-ray crystallographic analysis.

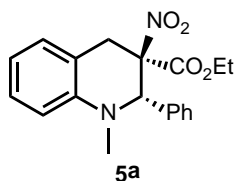

**(2S,3R)-ethyl 1-methyl-3-nitro-2-phenyl-1,2,3,4-tetrahydroquinoline-3-carboxylate, 5a.**

$^1\text{H}$  NMR (400 MHz,  $\text{CDCl}_3$ )  $\delta$  ppm 7.19 - 7.36 (m, 6 H) 7.08 (d,  $J=7.5$  Hz, 1 H) 6.72 (t,  $J=7.2$  Hz, 1 H) 6.66 (d,  $J=8.3$  Hz, 1 H) 5.41 (d,  $J=2.0$  Hz, 1 H) 4.11 (qd,  $J=7.1, 1.0$  Hz, 2 H) 3.70 (d,  $J=17.3$  Hz, 1 H) 3.59 (d,  $J=17.3$  Hz, 1 H) 2.96 (s, 3 H) 1.13 - 1.23 (m, 3 H);  $^{13}\text{C}$  NMR (125 MHz,  $\text{CDCl}_3$ )  $\delta$  164.5, 143.4, 137.7, 129.2, 128.9, 128.8, 127.8, 116.8, 114.8, 109.9, 92.9, 65.8, 63.2, 37.3, 30.4, 13.6; HRMS (ES) M-H calcd for  $\text{C}_{19}\text{H}_{19}\text{N}_2\text{O}_4$  339.1350, found 339.1379.

**5. Procedure for the synthesis of spirohydantoin (2'S,3'R)-1'-methyl-2'-phenyl-2',4'-dihydro-1'H-spiro[imidazolidine-4,3'-quinoline]-2,5-dione, 15**

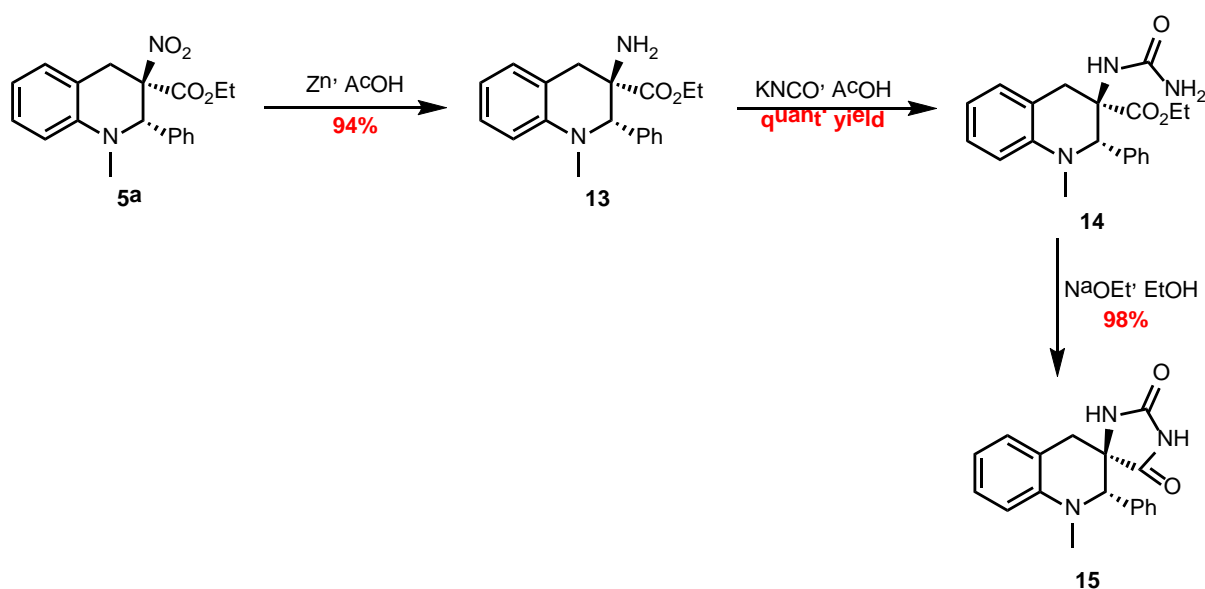

To a 25 mL round bottom flask equipped with a magnetic stirrer were added **5a** (0.1 g, 0.29 mmol) and zinc dust (0.096g, 1.47 mmol). The mixture was suspended in acetic acid (5 mL)

and the resulting mixture was stirred at rt. After 2 h, the reaction was filtered through celite and concentrated *in vacuo* to afford the amine derivative **13**, which was re-dissolved in acetic acid (5 mL). The solution was charged with potassium cyanate (0.024 g, 0.29 mmol) and the reaction was stirred overnight at rt. The reaction was then quenched with water and extracted with EtOAc 3x. The combined organic layers were washed with brine, dried over MgSO<sub>4</sub>, filtered and concentrated *in vacuo* to afford the crude urea **14**. The urea was then transferred to a 25 mL round bottom flask equipped with magnetic stirrer, then dissolved in absolute EtOH. The solution was treated with NaOEt in EtOH and, after 30 min, quenched with saturated aqueous NH<sub>4</sub>Cl solution and then extracted with EtOAc 3x. The combined organic layers were washed with brine, dried over MgSO<sub>4</sub>, filtered and then concentrated *in vacuo* to afford the spirohydantoin **15** (0.085g, 98% yield) as an off-white solid.

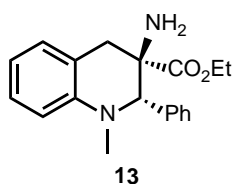

**(2S,3R)-ethyl 3-amino-1-methyl-2-phenyl-1,2,3,4-tetrahydroquinoline-3-carboxylate, 13.**

<sup>1</sup>H NMR (500 MHz, CDCl<sub>3</sub>) δ ppm 7.61 - 7.83 (m, 2 H) 7.23 - 7.34 (m, 3 H) 7.07 - 7.18 (m, 2 H) 6.98 (d, *J*=7.6 Hz, 2 H) 6.76 (d, *J*=8.2 Hz, 1 H) 6.64 (t, *J*=7.3 Hz, 1 H) 4.74 (s, 1 H) 4.02 (dq, *J*=10.7, 7.1 Hz, 1 H) 3.89 (dq, *J*=10.7, 7.1 Hz, 1 H) 3.48 (d, *J*=17.7 Hz, 1 H) 3.10 (d, *J*=17.7 Hz, 1 H) 2.93 (s, 3 H) 0.98 (t, *J*=7.3 Hz, 3 H); <sup>13</sup>C NMR (100 MHz, CDCl<sub>3</sub>) δ 166.2, 141.2, 128.6, 127.3, 127.1, 126.9, 125.1, 115.9, 112.8, 109.1, 64.9, 61.3, 58.3, 35.4, 29.1, 11.4; HRMS (ES) MH<sup>+</sup> calcd for C<sub>19</sub>H<sub>23</sub>N<sub>2</sub>O<sub>2</sub> 311.1754, found 311.1752.

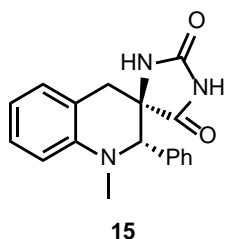

**(2'S,3'R)-1'-methyl-2'-phenyl-2',4'-dihydro-1'H-spiro[imidazolidine-4,3'-quinoline]-2,5-**

**dione, 15.** <sup>1</sup>H NMR (400 MHz, DMSO-*d*<sub>6</sub>) δ ppm 10.57 (s, 1 H) 8.20 (s, 1 H) 7.21 - 7.29 (m, 3 H) 7.12 (t, *J*=7.7 Hz, 1 H) 6.98 - 7.08 (m, 3 H) 6.69 (d, *J*=8.5 Hz, 1 H) 6.62 - 6.67 (m, 1 H) 4.43 (s, 1 H) 3.05 (d, *J*=16.3 Hz, 1 H) 2.77 (s, 3 H) 2.75 (d, *J*=16.3 Hz, 1 H); <sup>13</sup>C NMR (100



MHz, CDCl<sub>3</sub>)  $\delta$  173.1, 154.9, 143.7, 137.0, 127.8, 126.8, 126.6, 116.9, 115.0, 109.6, 67.7, 60.4, 36.6, 31.7; HRMS (ES) MH<sup>+</sup> calcd for C<sub>18</sub>H<sub>19</sub>N<sub>3</sub>O<sub>2</sub> 308.1394, found 308.1381.

## 6. General procedure for the synthesis of spirohydantoins from Knoevenagel adducts.

To a 25 mL round bottom flask equipped with magnetic stirrer were added the Knoevenagel adducts and Mg(OTf)<sub>2</sub>. The mixture was dissolved in CH<sub>3</sub>CN and heated to reflux until all the starting material was consumed after which the reaction was cooled to rt then concentrated *in vacuo*. The crude material was then re-dissolved in acetic acid and Zn dust was added. After 1-2 h of stirring at rt, the reaction was filtered thru celite and concentrated *in vacuo* to afford the amine derivatives as a mixture of diastereomers. The diastereomers can either be separated at the amine stage (**Procedure A**) or at the spirohydantoin stage (**Procedure B**) *via* chromatography to afford the pure amines or spirohydantoin products.

**Procedure A:** To a 25 mL round bottom flask equipped with magnetic stirrer were added the diastereomerically pure amine from above and potassium cyanate (1-2 equiv). The mixture was dissolved in acetic acid and the resulting solution was stirred overnight at rt. The reaction was then concentrated *in vacuo*, re-dissolved in EtOAc and washed with water and brine. The organic layer was separated and dried over MgSO<sub>4</sub>, filtered and then concentrated *in vacuo* to afford the crude urea derivative. This material was then transferred to a 25 mL round bottom flask, dissolved in EtOH, and then 21% wt NaOEt in EtOH (1-2 equiv) was added. The resulting brown solution was stirred at rt for about 30 min to 1 h until all the urea has been converted to the spirohydantoin derivative (as monitored by UPLC-MS). When the reaction was complete, solution was concentrated *in vacuo*, quenched with saturated aqueous NH<sub>4</sub>Cl solution and then extracted with EtOAc 3x. The combined organic layers were washed with brine, dried over MgSO<sub>4</sub>, filtered, and concentrated *in vacuo*. The crude residue was purified using chromatography to afford the pure spirohydantoin product as white powdery solid.

**Procedure B.** To a 25 mL round bottom flask equipped with magnetic stirrer were added the diastereomeric mixture of amine from above and potassium cyanate (1-2 equiv). The mixture was dissolved in acetic acid and the resulting solution was stirred overnight at rt. The reaction was then concentrated *in vacuo*, then re-dissolved in EtOAc and washed with water and brine. The organic layer was separated and dried over MgSO<sub>4</sub>, filtered and then concentrated *in vacuo*

to afford the crude urea derivative. This material (diastereomeric mixture of urea derivatives) was then transferred to a 25 mL round bottom flask, dissolved in EtOH, and 21% NaOEt in EtOH (1-2 equiv) was added. The resulting brown solution was stirred at rt for about 30 min to 1 h until all the urea has been converted to the spirohydantoin derivative (as monitored by UPLC-MS). When reaction was complete, the solution was concentrated *in vacuo*, quenched with saturated aqueous NH<sub>4</sub>Cl solution and then extracted with EtOAc 3x. The combined organic layers were washed with brine, dried over MgSO<sub>4</sub>, filtered, and concentrated *in vacuo*. The crude residue was purified using chromatography to afford the two spirohydantoin diastereomers as white powdery solids.

## 7. Procedure for the synthesis of spirohydantoins **23** and *epi*-**C3-23**

A mixture of ethyl nitroacetate (0.40 g, 0.35 mL, 2.99 mmol) and **19** (1.0 g, 2.99 mmol) in a 250-mL round bottom flask was dissolved in 20 mL anhydrous THF. The resulting solution was cooled to 0 °C using an ice/water bath followed by careful addition of TiCl<sub>4</sub> solution (6 mL, 5.99 mmol, 1M in DCM) *via* syringe. After 5 min of stirring, the brownish mixture was treated with 4-methylmorpholine (1.3 mL, 11.9 mmol) by dropwise addition over 10 min. The reaction was stirred for additional 12 h and then water was added to quench the reaction. The mixture was extracted with EtOAc 3x, and the combined organic layers were washed with brine, dried over Na<sub>2</sub>SO<sub>4</sub>, filtered and then concentrated *in vacuo*. The crude material was purified using ISCO automated flash chromatography with hexane/EtOAc as solvent system to afford **20** (1.14 g, 2.54 mmol, 85% yield) as red orange oil and as mixture of *E/Z* regioisomers.

To a 25 mL round bottom flask equipped with magnetic stirrer were added **20** (1.0 g, 2.23 mmol) and Mg(OTf)<sub>2</sub> (0.072 g, 0.22 mmol). The mixture was dissolved in CH<sub>3</sub>CN and heated to 120 °C until all the starting material was consumed. After 6 h, the reaction was cooled to rt and then concentrated *in vacuo*. The crude material was then re-dissolved in acetic acid and Zn dust (0.437 g, 6.68 mmol) was added. After 3 h of stirring at rt, the reaction was filtered thru celite and concentrated *in vacuo*. The crude was purified using ISCO automated flash chromatography using DCM/EtOAc as solvent system to afford **22** (0.914 g, 98% yield) as a mixture of diastereomers. The diastereomers were separated using Xbridge C18 column (19 mm x 150 mm 5 μm) mobile phase A: H<sub>2</sub>O with 0.2% NH<sub>4</sub>OH, mobile phase B: CH<sub>3</sub>CN, gradient 50-80% B over 5 min. The latter material was contaminated with presumably a third diastereomer and purified final material was obtained in the subsequent step.

Purification conditions (Achiral)

|                          |                           |  |
|--------------------------|---------------------------|--|
| Column Info: Xbridge C18 | 19mm x 150mm 5µm          |  |
| Mobile Phase A           | H2O with 0.2 % NH4OH pH10 |  |
| Mobile Phase B           | Acetonitrile              |  |
| Gradient (%B)            | 50-80%B over 5 min.       |  |
| Flow Rate                | 20 ml/min                 |  |
| Concentration            | mg/mL in _____            |  |
| Loading (mg/injection)   |                           |  |
| Outlet Pressure (SFC)    | N/A                       |  |

Typical Chromatogram:

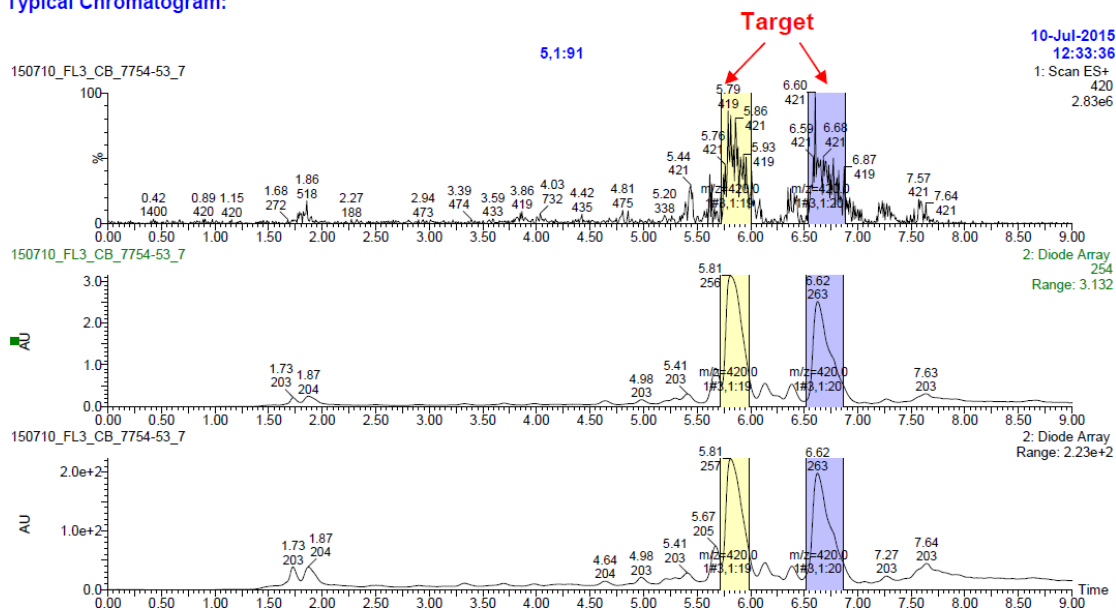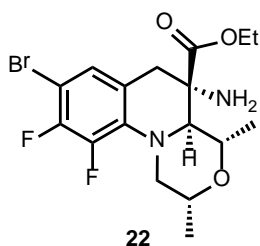

***rac*-(2R,4S,4aS,5S)-Ethyl 5-amino-8-bromo-9,10-difluoro-2,4-dimethyl-1,2,4,4a,5,6-hexahydro-[1,4]oxazino[4,3-a]quinoline-5-carboxylate, 22.** <sup>1</sup>H NMR (300 MHz, CD<sub>3</sub>OD) δ ppm 7.05 (d, *J*=7.2 Hz, 1 H) 4.79 (s, 3 H) 4.07 - 4.34 (m, 3 H) 3.53 - 3.82 (m, 2 H) 3.14 - 3.40 (m, 2 H) 2.87 - 3.09 (m, 2 H) 2.67 - 2.86 (m, 1 H) 1.24 (t, *J*=7.2 Hz, 3 H) 1.12 (t, *J*=6.8 Hz, 6 H); <sup>13</sup>C NMR (75 MHz, CD<sub>3</sub>OD) δ 174.3, 151.1 (dd, *J*<sub>cf</sub>=240.0, 15.0 Hz), 144.0 (dd, *J*<sub>cf</sub>=244.5, 16.5 Hz), 133.7, 128.5, 122.1, 97.4 (d, *J*<sub>cf</sub>=18.5 Hz), 74.5, 72.3, 70.3, 62.7, 58.3, 57.5, 36.3,

18.5, 18.4, 14.2;  $^{19}\text{F}$  NMR (282 MHz,  $\text{CD}_3\text{OD}$ )  $\delta$  -134.9, -148.5; HRMS (ES)  $\text{MH}^+$  calcd for  $\text{C}_{17}\text{H}_{22}\text{BrF}_2\text{N}_2\text{O}_3$  419.0737, found 419.0741.

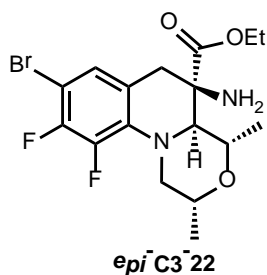

**rac-(2R,4S,4aS,5R)-Ethyl 5-amino-8-bromo-9,10-difluoro-2,4-dimethyl-1,2,4,4a,5,6-hexahydro-[1,4]oxazino[4,3-a]quinoline-5-carboxylate, epi-C3-22.**  $^1\text{H}$  NMR (300 MHz,  $\text{METHANOL-}d_4$ )  $\delta$  ppm 6.97 (d,  $J=7.0$  Hz, 1 H) 4.15 - 4.35 (m, 3 H) 4.03 (ddd,  $J=13.0, 2.1, 1.0$  Hz, 1 H) 3.84 (ddd,  $J=10.2, 6.2, 2.3$  Hz, 1 H) 3.59 - 3.74 (m, 1 H) 3.47 (d,  $J=8.7$  Hz, 1 H) 3.20 - 3.39 (m, 1 H) 3.08 (d,  $J=14.7$  Hz, 1 H) 2.78 - 2.99 (m, 1 H) 2.58 (d,  $J=14.7$ , 1 H) 1.35 (t,  $J=9$  Hz, 3 H), 1.18 (d,  $J=6$  Hz, 3H), 1.13 (d,  $J=6$  Hz, 3H);  $^{13}\text{C}$  NMR (75 MHz,  $\text{CD}_3\text{OD}$ )  $\delta$  176.2, 151.3 (dd,  $J_{\text{cf}}=241.5, 15.0$  Hz), 143.8 (dd,  $J_{\text{cf}}=243.8, 15.8$  Hz), 134.4, 127.9, 121.9, 97.1 (d,  $J_{\text{cf}}=18.8$  Hz), 75.5, 73.3, 68.1, 63.3, 59.5, 57.9, 41.6, 18.7, 18.6, 14.4;  $^{19}\text{F}$  NMR (282 MHz,  $\text{CD}_3\text{OD}$ )  $\delta$  -134.8, -149.5; HRMS (ES)  $\text{MH}^+$  calcd for  $\text{C}_{17}\text{H}_{22}\text{BrF}_2\text{N}_2\text{O}_3$  419.0737, found 419.0772.

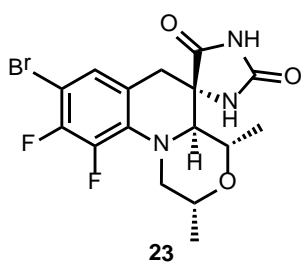

To a 25 mL round bottom flask equipped with magnetic stirrer were added **22** (0.1 g, 0.24 mmol) and potassium cyanate (0.023 g, 0.29 mmol). The mixture was dissolved in acetic acid (10 mL) and the resulting solution was stirred overnight at rt. The reaction was concentrated *in vacuo*, then re-dissolved in EtOAc and washed with water and brine. The organic layer was separated and dried over  $\text{MgSO}_4$ , filtered, and concentrated *in vacuo* to afford the crude urea derivative. This material was then transferred to a 25 mL round bottom flask, dissolved in 10

mL EtOH, and then 21% NaOEt in EtOH (0.30 mL, 0.29 mmol) was added. The resulting brown solution was stirred at rt for about 30 min to 1 h until all the urea has been converted to the spirohydantoin derivative (as monitored by UPLC-MS). When the reaction was complete, solution was concentrated *in vacuo*, quenched with saturated aqueous NH<sub>4</sub>Cl solution and then extracted with EtOAc 3x. The combined organic layers were washed with brine, dried over MgSO<sub>4</sub>, filtered, and concentrated *in vacuo*. The crude residue was purified using chromatography to afford the pure spirohydantoin product **23** (0.092 g, 93% yield) as white powdery solid. <sup>1</sup>H NMR (500 MHz, DMSO-*d*<sub>6</sub>) δ ppm 10.87 (s, 1 H) 8.37 (s, 1 H) 7.12 (d, *J*=6.9 Hz, 1 H) 3.88 (d, *J*=13.2 Hz, 1 H) 3.65 - 3.77 (m, 1 H) 3.43 - 3.53 (m, 1 H) 3.10 (d, *J*=9.1 Hz, 1 H) 2.85 - 2.97 (m, 3 H) 1.18 (t, *J*=7.1 Hz, 1 H) 0.88 (d, *J*=5 Hz, 3 H) 0.85 (d, *J*=5 Hz, 3 H); <sup>13</sup>C NMR (125 MHz, DMSO-*d*<sub>6</sub>) δ 173.4, 155.6, 148.2 (dd, *J*<sub>cf</sub>=243.8, 15.0 Hz), 140.7 (dd, *J*<sub>cf</sub>=242.5, 15.0 Hz), 133.1, 125.5, 121.9, 97.9 (d, *J*<sub>cf</sub>=18.8 Hz), 72.6, 71.2, 66.3, 62.6, 55.9, 37.2, 18.3, 18.1; <sup>19</sup>F NMR (470 MHz, DMSO-*d*<sub>6</sub>) δ -73.43; HRMS (ES) MH<sup>-</sup> calcd for C<sub>16</sub>H<sub>15</sub>BrF<sub>2</sub>N<sub>3</sub>O<sub>3</sub> 414.0270, found 414.0267.

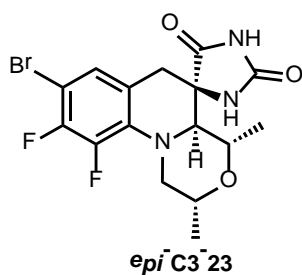

To a 25 mL round bottom flask equipped with magnetic stirrer were added **epi-C3-22** (0.1 g, 0.24 mmol) and potassium cyanate (0.023 g, 0.29 mmol). The mixture was dissolved in acetic acid (10 mL) and the resulting solution was stirred overnight at rt. The reaction was concentrated *in vacuo*, re-dissolved in EtOAc and washed with water and brine. The organic layer was separated and dried over MgSO<sub>4</sub>, filtered, and concentrated *in vacuo* to afford the crude urea derivative. This material was then transferred to a 25 mL round bottom flask, dissolved in 10 mL EtOH, and 21% NaOEt in EtOH (0.30 mL, 0.29 mmol) was added. The resulting brown solution was stirred at rt for about 30 min to 1 h until all the urea has been converted to the spirohydantoin derivative (as monitored by UPLC-MS). When the reaction was complete, solution was concentrated *in vacuo*, quenched with saturated aqueous NH<sub>4</sub>Cl solution and then extracted with EtOAc 3x. The combined organic layers were washed with brine, dried over MgSO<sub>4</sub>, filtered, and concentrated *in vacuo*. The crude residue was purified

using chromatography to afford the pure spirohydantoin product **23** (0.094 g, 95% yield) as white powdery solid.  $^1\text{H}$  NMR (500 MHz, DMSO- $d_6$ )  $\delta$  ppm 10.93 (s, 1 H) 8.05 (s, 1 H) 7.05 (d,  $J=6.9$  Hz, 1 H) 3.74 (d,  $J=13.6$  Hz, 1 H) 3.50 - 3.59 (m, 1 H) 3.22 - 3.32 (m, 1 H) 3.16 - 3.21 (m, 1 H) 2.75 - 2.85 (m, 1 H) 2.57 - 2.69 (m, 2 H) 2.35 - 2.41 (m, 1 H) 0.96 (d,  $J=6.0$  Hz, 3 H) 0.80 (d,  $J=6.3$  Hz, 3 H);  $^{13}\text{C}$  NMR (125 MHz, DMSO- $d_6$ )  $\delta$  175.7, 156.1, 148.6 (dd,  $J_{\text{cf}}=238.8, 13.8$  Hz), 141.4 (dd,  $J_{\text{cf}}=243.8, 17.5$  Hz), 133.1, 126.3, 121.6, 94.9 (d,  $J_{\text{cf}}=18.8$  Hz), 72.8, 71.2, 64.9, 63.2, 55.5, 37.5, 18.1, 17.8;  $^{19}\text{F}$  NMR (470 MHz, DMSO- $d_6$ )  $\delta$  -73.40; HRMS (ES)  $\text{MH}^-$  calcd for  $\text{C}_{16}\text{H}_{15}\text{BrF}_2\text{N}_3\text{O}_3$  414.0270, found 414.0279.

## 8. References

[1] Wortman, L.; Koppitz, M.; Menzenbach, M.; Kosemund, D.; Schmees, N.; Muhn, H.-P.; Frenzel, T.; Liesener, F. P.; Schrey, A. K.; Kuehne, R.; PCT Int. Appl. (2009), WO 2009013354.

## 9. X-ray crystallography data for **5a**

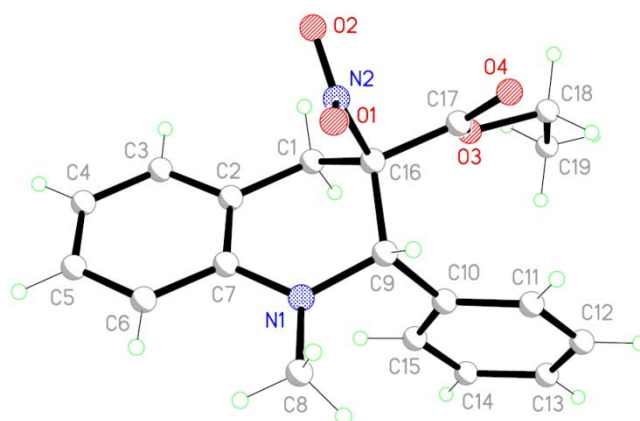

Table 1. Crystal data and structure refinement for **5a**.

|                     |                                                  |
|---------------------|--------------------------------------------------|
| Identification code | <b>5a</b>                                        |
| Empirical formula   | $\text{C}_{19}\text{H}_{20}\text{N}_2\text{O}_4$ |
| Formula weight      | 340.37                                           |
| Temperature         | 296(2) K                                         |
| Wavelength          | 0.71073 Å                                        |
| Crystal system      | Monoclinic                                       |
| Space group         | $P2(1)/n$                                        |

|                                   |                                             |                               |
|-----------------------------------|---------------------------------------------|-------------------------------|
| Unit cell dimensions              | a = 7.7910(4) Å                             | $\alpha = 90^\circ$ .         |
|                                   | b = 13.1164(6) Å                            | $\beta = 96.8950(10)^\circ$ . |
|                                   | c = 16.9526(8) Å                            | $\gamma = 90^\circ$ .         |
| Volume                            | 1719.85(14) Å <sup>3</sup>                  |                               |
| Z                                 | 4                                           |                               |
| Density (calculated)              | 1.315 Mg/m <sup>3</sup>                     |                               |
| Absorption coefficient            | 0.093 mm <sup>-1</sup>                      |                               |
| F(000)                            | 720                                         |                               |
| Crystal size                      | 0.28 x 0.16 x 0.10 mm <sup>3</sup>          |                               |
| Theta range for data collection   | 1.97 to 30.57°.                             |                               |
| Index ranges                      | -11 ≤ h ≤ 11, -18 ≤ k ≤ 18, -24 ≤ l ≤ 24    |                               |
| Reflections collected             | 27526                                       |                               |
| Independent reflections           | 5271 [R(int) = 0.0306]                      |                               |
| Completeness to theta = 30.57°    | 99.9 %                                      |                               |
| Absorption correction             | None                                        |                               |
| Refinement method                 | Full-matrix least-squares on F <sup>2</sup> |                               |
| Data / restraints / parameters    | 5271 / 0 / 226                              |                               |
| Goodness-of-fit on F <sup>2</sup> | 1.048                                       |                               |
| Final R indices [I > 2σ(I)]       | R1 = 0.0515, wR2 = 0.1438                   |                               |
| R indices (all data)              | R1 = 0.0798, wR2 = 0.1659                   |                               |
| Largest diff. peak and hole       | 0.357 and -0.276 e.Å <sup>-3</sup>          |                               |

Table 2. Atomic coordinates ( $\times 10^4$ ) and equivalent isotropic displacement parameters ( $\text{\AA}^2 \times 10^3$ ) for **5a**.  $U(\text{eq})$  is defined as one third of the trace of the orthogonalized  $U^{ij}$  tensor.

|       | x        | y        | z        | U(eq) |
|-------|----------|----------|----------|-------|
| O(1)  | 4407(2)  | 6984(1)  | 2379(1)  | 72(1) |
| O(2)  | 6449(2)  | 6918(2)  | 1647(1)  | 95(1) |
| O(3)  | 3372(2)  | 6646(1)  | -243(1)  | 55(1) |
| O(4)  | 3292(2)  | 5624(1)  | 813(1)   | 72(1) |
| N(1)  | 2192(2)  | 8778(1)  | 1659(1)  | 45(1) |
| N(2)  | 4966(2)  | 7087(1)  | 1749(1)  | 51(1) |
| C(1)  | 4638(2)  | 8275(1)  | 609(1)   | 41(1) |
| C(2)  | 4881(2)  | 9185(1)  | 1147(1)  | 39(1) |
| C(3)  | 6307(2)  | 9817(1)  | 1146(1)  | 49(1) |
| C(4)  | 6539(2)  | 10659(1) | 1636(1)  | 58(1) |
| C(5)  | 5335(2)  | 10856(1) | 2145(1)  | 56(1) |
| C(6)  | 3912(2)  | 10238(1) | 2171(1)  | 48(1) |
| C(7)  | 3647(2)  | 9389(1)  | 1666(1)  | 38(1) |
| C(8)  | 937(2)   | 8967(2)  | 2206(1)  | 60(1) |
| C(9)  | 2019(2)  | 7783(1)  | 1271(1)  | 38(1) |
| C(10) | 601(2)   | 7773(1)  | 570(1)   | 38(1) |
| C(11) | -437(2)  | 6917(1)  | 425(1)   | 49(1) |
| C(12) | -1676(2) | 6874(2)  | -234(1)  | 60(1) |
| C(13) | -1902(2) | 7688(2)  | -748(1)  | 62(1) |
| C(14) | -903(3)  | 8547(2)  | -602(1)  | 58(1) |
| C(15) | 338(2)   | 8594(1)  | 54(1)    | 47(1) |
| C(16) | 3752(2)  | 7425(1)  | 1011(1)  | 38(1) |
| C(17) | 3463(2)  | 6447(1)  | 520(1)   | 47(1) |
| C(18) | 2853(3)  | 5819(2)  | -799(1)  | 73(1) |
| C(19) | 2348(4)  | 6301(2)  | -1579(1) | 91(1) |



Table 3. Bond lengths [ $\text{\AA}$ ] and angles [ $^\circ$ ] for **5a**.

|                  |            |
|------------------|------------|
| O(1)-N(2)        | 1.2074(19) |
| O(2)-N(2)        | 1.210(2)   |
| O(3)-C(17)       | 1.312(2)   |
| O(3)-C(18)       | 1.462(2)   |
| O(4)-C(17)       | 1.203(2)   |
| N(1)-C(7)        | 1.3865(19) |
| N(1)-C(8)        | 1.447(2)   |
| N(1)-C(9)        | 1.4604(19) |
| N(2)-C(16)       | 1.5405(19) |
| C(1)-C(2)        | 1.500(2)   |
| C(1)-C(16)       | 1.516(2)   |
| C(2)-C(3)        | 1.387(2)   |
| C(2)-C(7)        | 1.404(2)   |
| C(3)-C(4)        | 1.381(3)   |
| C(4)-C(5)        | 1.373(3)   |
| C(5)-C(6)        | 1.378(3)   |
| C(6)-C(7)        | 1.405(2)   |
| C(9)-C(10)       | 1.522(2)   |
| C(9)-C(16)       | 1.543(2)   |
| C(10)-C(15)      | 1.388(2)   |
| C(10)-C(11)      | 1.388(2)   |
| C(11)-C(12)      | 1.388(2)   |
| C(12)-C(13)      | 1.376(3)   |
| C(13)-C(14)      | 1.375(3)   |
| C(14)-C(15)      | 1.384(2)   |
| C(16)-C(17)      | 1.531(2)   |
| C(18)-C(19)      | 1.475(4)   |
| C(17)-O(3)-C(18) | 117.81(15) |
| C(7)-N(1)-C(8)   | 120.66(13) |
| C(7)-N(1)-C(9)   | 123.48(12) |
| C(8)-N(1)-C(9)   | 114.09(13) |
| O(1)-N(2)-O(2)   | 123.89(15) |
| O(1)-N(2)-C(16)  | 119.95(14) |
| O(2)-N(2)-C(16)  | 116.14(14) |
| C(2)-C(1)-C(16)  | 110.04(12) |

|                   |            |
|-------------------|------------|
| C(3)-C(2)-C(7)    | 119.71(14) |
| C(3)-C(2)-C(1)    | 121.17(14) |
| C(7)-C(2)-C(1)    | 119.12(13) |
| C(4)-C(3)-C(2)    | 121.64(16) |
| C(5)-C(4)-C(3)    | 118.61(16) |
| C(4)-C(5)-C(6)    | 121.44(16) |
| C(5)-C(6)-C(7)    | 120.48(16) |
| N(1)-C(7)-C(2)    | 120.31(13) |
| N(1)-C(7)-C(6)    | 121.56(14) |
| C(2)-C(7)-C(6)    | 118.11(14) |
| N(1)-C(9)-C(10)   | 112.25(12) |
| N(1)-C(9)-C(16)   | 111.33(12) |
| C(10)-C(9)-C(16)  | 110.65(11) |
| C(15)-C(10)-C(11) | 118.52(14) |
| C(15)-C(10)-C(9)  | 121.60(13) |
| C(11)-C(10)-C(9)  | 119.86(13) |
| C(12)-C(11)-C(10) | 120.65(16) |
| C(13)-C(12)-C(11) | 120.12(17) |
| C(14)-C(13)-C(12) | 119.73(16) |
| C(13)-C(14)-C(15) | 120.43(17) |
| C(14)-C(15)-C(10) | 120.53(16) |
| C(1)-C(16)-C(17)  | 114.64(12) |
| C(1)-C(16)-N(2)   | 107.97(12) |
| C(17)-C(16)-N(2)  | 103.73(12) |
| C(1)-C(16)-C(9)   | 111.44(12) |
| C(17)-C(16)-C(9)  | 109.50(12) |
| N(2)-C(16)-C(9)   | 109.18(11) |
| O(4)-C(17)-O(3)   | 126.13(16) |
| O(4)-C(17)-C(16)  | 122.95(15) |
| O(3)-C(17)-C(16)  | 110.88(13) |
| O(3)-C(18)-C(19)  | 106.51(18) |

---

Symmetry transformations used to generate equivalent atoms:

Table 4. Anisotropic displacement parameters ( $\text{\AA}^2 \times 10^3$ ) for **5a**. The anisotropic displacement factor exponent takes the form:  $-2 \left[ h^2 a^{*2} U^{11} + \dots + 2 h k a^* b^* U^{12} \right]$

|       | U <sup>11</sup> | U <sup>22</sup> | U <sup>33</sup> | U <sup>23</sup> | U <sup>13</sup> | U <sup>12</sup> |
|-------|-----------------|-----------------|-----------------|-----------------|-----------------|-----------------|
| O(1)  | 70(1)           | 101(1)          | 44(1)           | 20(1)           | -2(1)           | 6(1)            |
| O(2)  | 54(1)           | 148(2)          | 81(1)           | 33(1)           | 4(1)            | 42(1)           |
| O(3)  | 72(1)           | 45(1)           | 47(1)           | -12(1)          | 2(1)            | 2(1)            |
| O(4)  | 104(1)          | 35(1)           | 75(1)           | 4(1)            | -1(1)           | 5(1)            |
| N(1)  | 43(1)           | 48(1)           | 47(1)           | -12(1)          | 12(1)           | -3(1)           |
| N(2)  | 50(1)           | 53(1)           | 47(1)           | 8(1)            | -3(1)           | 7(1)            |
| C(1)  | 42(1)           | 42(1)           | 37(1)           | -2(1)           | 8(1)            | 0(1)            |
| C(2)  | 41(1)           | 38(1)           | 37(1)           | 2(1)            | 1(1)            | 1(1)            |
| C(3)  | 46(1)           | 50(1)           | 52(1)           | 3(1)            | 6(1)            | -5(1)           |
| C(4)  | 54(1)           | 48(1)           | 69(1)           | -1(1)           | -2(1)           | -11(1)          |
| C(5)  | 58(1)           | 44(1)           | 61(1)           | -13(1)          | -8(1)           | 0(1)            |
| C(6)  | 49(1)           | 46(1)           | 46(1)           | -9(1)           | -3(1)           | 7(1)            |
| C(7)  | 38(1)           | 37(1)           | 36(1)           | 1(1)            | -2(1)           | 5(1)            |
| C(8)  | 54(1)           | 67(1)           | 61(1)           | -12(1)          | 22(1)           | 0(1)            |
| C(9)  | 39(1)           | 37(1)           | 38(1)           | 2(1)            | 5(1)            | -1(1)           |
| C(10) | 37(1)           | 38(1)           | 41(1)           | 1(1)            | 6(1)            | 2(1)            |
| C(11) | 45(1)           | 45(1)           | 57(1)           | 2(1)            | 5(1)            | -5(1)           |
| C(12) | 47(1)           | 62(1)           | 69(1)           | -12(1)          | -1(1)           | -8(1)           |
| C(13) | 51(1)           | 78(1)           | 54(1)           | -12(1)          | -8(1)           | 10(1)           |
| C(14) | 64(1)           | 59(1)           | 51(1)           | 6(1)            | -3(1)           | 17(1)           |
| C(15) | 50(1)           | 40(1)           | 51(1)           | 4(1)            | 1(1)            | 5(1)            |
| C(16) | 41(1)           | 36(1)           | 37(1)           | 1(1)            | 0(1)            | 5(1)            |
| C(17) | 50(1)           | 38(1)           | 53(1)           | -2(1)           | 0(1)            | 9(1)            |
| C(18) | 94(2)           | 53(1)           | 68(1)           | -27(1)          | -7(1)           | 7(1)            |
| C(19) | 114(2)          | 101(2)          | 56(1)           | -27(1)          | 5(1)            | -23(2)          |

Table 5. Hydrogen coordinates ( $\times 10^4$ ) and isotropic displacement parameters ( $\text{\AA}^2 \times 10^{-3}$ ) for **5a**.

|        | x     | y     | z     | U(eq) |
|--------|-------|-------|-------|-------|
| H(1A)  | 5753  | 8041  | 481   | 49    |
| H(1B)  | 3942  | 8464  | 117   | 49    |
| H(3A)  | 7128  | 9670  | 807   | 59    |
| H(4A)  | 7490  | 11084 | 1622  | 69    |
| H(5A)  | 5482  | 11420 | 2480  | 67    |
| H(6A)  | 3122  | 10384 | 2525  | 57    |
| H(8A)  | 1125  | 9633  | 2435  | 89    |
| H(8B)  | 1062  | 8463  | 2619  | 89    |
| H(8C)  | -207  | 8931  | 1925  | 89    |
| H(9A)  | 1692  | 7292  | 1662  | 46    |
| H(11A) | -301  | 6368  | 774   | 59    |
| H(12A) | -2355 | 6294  | -329  | 72    |
| H(13A) | -2728 | 7657  | -1191 | 75    |
| H(14A) | -1062 | 9100  | -947  | 70    |
| H(15A) | 1000  | 9181  | 149   | 57    |
| H(18A) | 1887  | 5445  | -630  | 87    |
| H(18B) | 3806  | 5350  | -828  | 87    |
| H(19A) | 1994  | 5784  | -1965 | 136   |
| H(19B) | 3315  | 6668  | -1738 | 136   |
| H(19C) | 1407  | 6763  | -1540 | 136   |

Table 6. Torsion angles [°] for **5a**.

---

|                         |             |
|-------------------------|-------------|
| C(16)-C(1)-C(2)-C(3)    | 146.62(14)  |
| C(16)-C(1)-C(2)-C(7)    | -32.65(18)  |
| C(7)-C(2)-C(3)-C(4)     | -1.1(2)     |
| C(1)-C(2)-C(3)-C(4)     | 179.67(15)  |
| C(2)-C(3)-C(4)-C(5)     | 1.3(3)      |
| C(3)-C(4)-C(5)-C(6)     | -0.4(3)     |
| C(4)-C(5)-C(6)-C(7)     | -0.7(3)     |
| C(8)-N(1)-C(7)-C(2)     | 178.38(15)  |
| C(9)-N(1)-C(7)-C(2)     | 14.5(2)     |
| C(8)-N(1)-C(7)-C(6)     | -3.3(2)     |
| C(9)-N(1)-C(7)-C(6)     | -167.20(14) |
| C(3)-C(2)-C(7)-N(1)     | 178.37(14)  |
| C(1)-C(2)-C(7)-N(1)     | -2.4(2)     |
| C(3)-C(2)-C(7)-C(6)     | 0.0(2)      |
| C(1)-C(2)-C(7)-C(6)     | 179.25(13)  |
| C(5)-C(6)-C(7)-N(1)     | -177.47(15) |
| C(5)-C(6)-C(7)-C(2)     | 0.9(2)      |
| C(7)-N(1)-C(9)-C(10)    | -114.38(15) |
| C(8)-N(1)-C(9)-C(10)    | 80.74(17)   |
| C(7)-N(1)-C(9)-C(16)    | 10.28(19)   |
| C(8)-N(1)-C(9)-C(16)    | -154.59(14) |
| N(1)-C(9)-C(10)-C(15)   | 39.36(19)   |
| C(16)-C(9)-C(10)-C(15)  | -85.68(17)  |
| N(1)-C(9)-C(10)-C(11)   | -142.22(14) |
| C(16)-C(9)-C(10)-C(11)  | 92.74(16)   |
| C(15)-C(10)-C(11)-C(12) | 1.8(2)      |
| C(9)-C(10)-C(11)-C(12)  | -176.65(15) |
| C(10)-C(11)-C(12)-C(13) | -0.8(3)     |
| C(11)-C(12)-C(13)-C(14) | -0.4(3)     |
| C(12)-C(13)-C(14)-C(15) | 0.5(3)      |
| C(13)-C(14)-C(15)-C(10) | 0.6(3)      |
| C(11)-C(10)-C(15)-C(14) | -1.7(2)     |
| C(9)-C(10)-C(15)-C(14)  | 176.74(15)  |
| C(2)-C(1)-C(16)-C(17)   | -179.03(12) |
| C(2)-C(1)-C(16)-N(2)    | -64.00(15)  |
| C(2)-C(1)-C(16)-C(9)    | 55.90(15)   |

|                        |             |
|------------------------|-------------|
| O(1)-N(2)-C(16)-C(1)   | 132.59(17)  |
| O(2)-N(2)-C(16)-C(1)   | -49.1(2)    |
| O(1)-N(2)-C(16)-C(17)  | -105.38(18) |
| O(2)-N(2)-C(16)-C(17)  | 73.0(2)     |
| O(1)-N(2)-C(16)-C(9)   | 11.3(2)     |
| O(2)-N(2)-C(16)-C(9)   | -170.38(17) |
| N(1)-C(9)-C(16)-C(1)   | -45.24(16)  |
| C(10)-C(9)-C(16)-C(1)  | 80.32(14)   |
| N(1)-C(9)-C(16)-C(17)  | -173.13(12) |
| C(10)-C(9)-C(16)-C(17) | -47.57(15)  |
| N(1)-C(9)-C(16)-N(2)   | 73.94(15)   |
| C(10)-C(9)-C(16)-N(2)  | -160.50(12) |
| C(18)-O(3)-C(17)-O(4)  | 6.3(3)      |
| C(18)-O(3)-C(17)-C(16) | -171.39(15) |
| C(1)-C(16)-C(17)-O(4)  | 156.34(17)  |
| N(2)-C(16)-C(17)-O(4)  | 38.9(2)     |
| C(9)-C(16)-C(17)-O(4)  | -77.6(2)    |
| C(1)-C(16)-C(17)-O(3)  | -25.87(18)  |
| N(2)-C(16)-C(17)-O(3)  | -143.35(13) |
| C(9)-C(16)-C(17)-O(3)  | 100.21(15)  |
| C(17)-O(3)-C(18)-C(19) | 163.28(19)  |

---

Symmetry transformations used to generate equivalent atoms:

## 10. Spectral data and full characterization of spirohydantoin products.

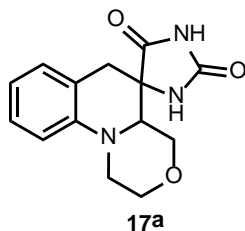

**2,4,4a,6-tetrahydro-1H-spiro[[1,4]oxazino[4,3-a]quinoline-5,4'-imidazolidine]-2',5'-dione, 17a.** Spirohydantoin **17a** was synthesized *via* **Procedure B**. To a 25 mL round bottom

flask equipped with magnetic stirrer were added the diastereomeric mixture of amine (0.39 g, 1.41 mmol) from above and potassium cyanate (0.137 g, 1.69 mmol). The mixture was dissolved in acetic acid (10 mL) and the resulting solution was stirred overnight at rt. The reaction was then concentrated *in vacuo*, then re-dissolved in EtOAc and washed with water and brine. The organic layer was separated and dried over MgSO<sub>4</sub>, filtered, and concentrated *in vacuo* to afford the crude urea derivative. This material (diastereomeric mixture of urea derivatives) was then transferred to a 25 mL round bottom flask, dissolved in EtOH, and NaOEt in EtOH (-6 mL, 1.69 mmol) was added. The resulting brown solution was stirred at rt for about 30 min to 1 h until all the urea has been converted to the spirohydantoin derivative (as monitored by UPLC-MS). When the reaction was complete, solution was concentrated *in vacuo*, quenched with saturated aqueous NH<sub>4</sub>Cl solution and then extracted with EtOAc 3x. The combined organic layers were washed with brine, dried over MgSO<sub>4</sub>, filtered, and concentrated *in vacuo*. The crude residue was purified using chromatography to afford the two spirohydantoin diastereomers as white powdery solids **17a-dia-1** (0.2 g, 52% yield): <sup>1</sup>H NMR (400 MHz, DMSO-*d*<sub>6</sub>) δ ppm 10.73 (s, 1 H) 8.04 - 8.11 (m, 1 H) 7.09 (t, *J*=7.4 Hz, 1 H) 6.97 (d, *J*=7.2 Hz, 1 H) 6.89 (d, *J*=8.0 Hz, 1 H) 6.69 (t, *J*=7.4 Hz, 1 H) 3.96 (d, *J*=9.0 Hz, 1 H) 3.78 - 3.92 (m, 2 H) 3.49 (td, *J*=11.7, 2.5 Hz, 1 H) 3.36 (br. s., 2 H) 3.14 - 3.25 (m, 2 H) 2.79 - 3.01 (m, 2 H) 2.83 (td, *J*=12.0, 3.0 Hz, 1 H); <sup>13</sup>C NMR (100 MHz, DMSO-*d*<sub>6</sub>) δ 174.2, 156.1, 144.4, 129.0, 127.1, 119.7, 118.1, 112.4, 66.1, 65.8, 59.6, 58.9, 46.6, 35.5; HRMS (ES) MH<sup>+</sup> calcd for C<sub>14</sub>H<sub>16</sub>N<sub>3</sub>O<sub>3</sub> 274.1186, found 274.1195. **17a-dia-2** (0.13 g, 34 % yield): <sup>1</sup>H NMR (400 MHz, DMSO-*d*<sub>6</sub>) δ ppm 10.91 (s, 1 H) 8.32 (s, 1 H) 7.23 (s, 1 H) 7.06 - 7.18 (m, 1 H) 7.00 (d, *J*=7.4 Hz, 1 H) 6.93 (d, *J*=8.3 Hz, 1 H) 6.74 (t, *J*=7.3 Hz, 1 H) 3.95 (dd, *J*=11.4, 3.4 Hz, 1 H) 3.76 (d, *J*=11.0 Hz, 1 H) 3.65 (d, *J*=8.5 Hz, 1 H) 3.53 (td, *J*=11.7, 2.8 Hz, 1 H) 3.14 - 3.37 (m, 4 H) 2.67 - 2.82 (m, 2 H); <sup>13</sup>C NMR (100 MHz, DMSO-*d*<sub>6</sub>) δ 175.6, 156.4, 144.8, 129.6, 127.3, 119.6, 118.5, 112.7, 66.1, 65.8, 60.2, 56.5, 45.6, 37.0; HRMS (ES) MH<sup>+</sup> calcd for C<sub>14</sub>H<sub>16</sub>N<sub>3</sub>O<sub>3</sub> 274.1186, found 274.1189.

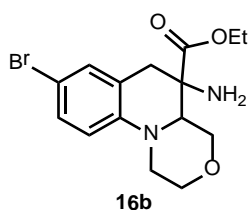

**Ethyl 5-amino-8-bromo-1,2,4,4a,5,6-hexahydro-[1,4]oxazino[4,3-a]quinoline-5-carboxylate, 16b.**

Diastereomers were separated using Atlantis T3 column (19 mm x100 mm 5 $\mu$ m) + Jupiter Proteo (21 mm x100 mm 4 $\mu$ m); mobile phase A: H<sub>2</sub>O with 20 mM ammonium acetate pH 8, mobile phase B: CH<sub>3</sub>CN, gradient 40-60% B in 20 min. **Diastereomer 1 (16b)**: <sup>1</sup>H NMR (400 MHz, Solvent)  $\delta$  ppm 7.34 (dd,  $J=8.9, 2.1$  Hz, 1 H) 7.27 (d,  $J=2.0$  Hz, 1 H) 6.89 (d,  $J=9.0$  Hz, 1 H) 4.39 (q,  $J=7.2$  Hz, 2 H) 3.81 - 4.02 (m, 4 H) 3.45 - 3.67 (m, 3 H) 3.20 - 3.39 (m, 2 H) 1.36 (t,  $J=7.2$  Hz, 3 H); <sup>13</sup>C NMR (100 MHz, CD<sub>3</sub>CO<sub>2</sub>D)  $\delta$  167.4, 141.6, 132.5, 131.2, 120.8, 115.8, 111.2, 65.1, 64.1, 63.4, 58.5, 48.3, 31.0, 13.1; HRMS (ES) MH<sup>+</sup> calcd for C<sub>15</sub>H<sub>21</sub>BrN<sub>2</sub>O<sub>3</sub> 355.0613, found 355.0645.

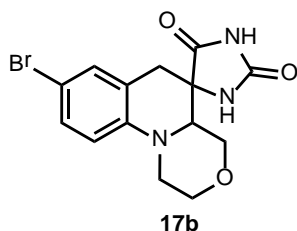

**8-Bromo-2,4,4a,6-tetrahydro-1H-spiro[[1,4]oxazino[4,3-a]quinoline-5,4'-imidazolidine]-2',5'-dione, 17b.**

To a 25 mL round bottom flask equipped with magnetic stirrer were added the diastereomerically pure amine **16b** (0.08 g, 0.23 mmol) from above and potassium cyanate (0.037 g, 0.45 mmol). The mixture was dissolved in acetic acid (5 mL) and the resulting solution was stirred overnight at rt. The reaction was concentrated *in vacuo*, re-dissolved in EtOAc and washed with water and brine. The organic layer was separated, dried over MgSO<sub>4</sub>, filtered, and concentrated *in vacuo* to afford the crude urea derivative. This material was then transferred to a 25 mL round bottom flask, dissolved in EtOH, and NaOEt in EtOH (0.08 mL, 0.21 mmol) was added. The resulting brown solution was stirred at rt for about 30 min to 1 h until all the urea has been converted to the spirohydantoin derivative (as monitored by UPLC-MS). When the reaction was complete, solution was concentrated *in vacuo*, quenched with saturated aqueous NH<sub>4</sub>Cl solution and then extracted with EtOAc 3x. The combined organic layers were washed with brine, dried over MgSO<sub>4</sub>, filtered, and concentrated *in vacuo*. The crude residue was purified using chromatography (20-75% Water/ CH<sub>3</sub>CN /TFA) to afford the pure spirohydantoin product **17b** (0.047 g, 76% yield) as white powdery solid. <sup>1</sup>H NMR (400 MHz, DMSO-*d*<sub>6</sub>)  $\delta$  ppm 10.78 (br 2, 1H), 8.12 (s, 1 H) 7.22 (d,  $J=8.9$  Hz, 1 H) 7.16 (s, 1 H) 6.85 (d,  $J=9.0$  Hz, 1 H) 3.95 (d,  $J=7.0$  Hz, 1 H) 3.76 - 3.92 (m, 2 H) 3.47 (td,  $J=11.7, 2.6$  Hz, 1 H) 3.34 (br. s., 3 H) 3.14 - 3.26 (m, 2 H) 2.81 - 3.03 (m, 3 H) 2.06 - 2.13 (m, 1 H); <sup>13</sup>C NMR



(100 MHz, DMSO-*d*<sub>6</sub>)  $\delta$  174.0, 156.1, 143.7, 131.1, 129.5, 122.4, 114.4, 108.9, 66.0, 65.7, 59.2, 58.7, 46.5, 34.9; HRMS (ES)  $MH^+$  calcd for C<sub>14</sub>H<sub>15</sub>BrN<sub>3</sub>O<sub>3</sub> 352.0291, found 352.0282.

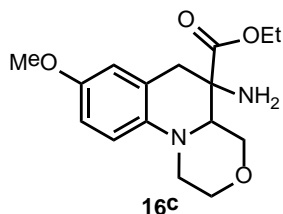

**Ethyl 5-amino-8-methoxy-1,2,4,4a,5,6-hexahydro-[1,4]oxazino[4,3-a]quinoline-5-carboxylate, 16c.** Diastereomers were separated using Atlantis T3 column (19 mm x100 mm 5 $\mu$ m) + Jupiter Proteo (21 mm x100 mm 4 $\mu$ m); mobile phase A: H<sub>2</sub>O with 20 mM ammonium formate pH 4, mobile phase B: CH<sub>3</sub>CN, gradient 20-40% B in 20 min. **Diastereomer 1 (16c):** <sup>1</sup>H NMR (400 MHz, CD<sub>3</sub>CO<sub>2</sub>D)  $\delta$  ppm 6.95 (d, *J*=9.3 Hz, 1 H) 6.86 (dd, *J*=9.0, 2.8 Hz, 1 H) 6.71 (d, *J*=2.5 Hz, 1 H) 4.44 (q, *J*=7.0 Hz, 2 H) 4.10 (dd, *J*=11.3, 2.8 Hz, 1 H) 3.64 - 3.87 (m, 8 H) 3.49 (dd, *J*=11.0, 3.8 Hz, 1 H) 3.32 (d, *J*=17.6 Hz, 1 H) 2.85 - 3.06 (m, 1 H) 1.39 (t, *J*=7.2 Hz, 3 H); <sup>13</sup>C NMR (100 MHz, CD<sub>3</sub>CO<sub>2</sub>D)  $\delta$  168.1, 165.6, 153.9, 137.9, 118.7, 114.8, 114.4, 66.2, 64.8, 63.8, 58.4, 56.3, 54.9, 46.3, 35.5, 13.1; HRMS (ES)  $MH^+$  calcd for C<sub>16</sub>H<sub>23</sub>BrN<sub>2</sub>O<sub>4</sub> 307.1613, found 307.1644.

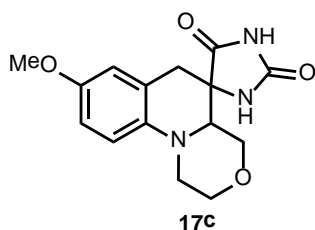

**8-Methoxy-2,4,4a,6-tetrahydro-1H-spiro[[1,4]oxazino[4,3-a]quinoline-5,4'-imidazolidine]-2',5'-dione, 17c.** To a 25 mL round bottom flask equipped with magnetic stirrer were added **16c** (0.09 g, 0.29 mmol) from above and potassium cyanate (0.048 g, 0.59 mmol). The mixture was dissolved in acetic acid (10 mL) and the resulting solution was stirred overnight at rt. The reaction was concentrated *in vacuo*, re-dissolved in EtOAc and washed with water and brine. The organic layer was separated and dried over MgSO<sub>4</sub>, filtered, and concentrated *in vacuo* to afford the crude urea derivative. This material was then transferred to a 25 mL round bottom flask, dissolved in EtOH, and NaOEt in EtOH (0.10 mL, 0.29 mmol) was added. The resulting brown solution was stirred at rt for about 30 min to 1 h until all the urea has been converted to the spirohydantoin derivative (as monitored by UPLC-MS). When

the reaction was complete, solution was concentrated *in vacuo*, quenched with saturated aqueous NH<sub>4</sub>Cl solution and then extracted with EtOAc 3x. The combined organic layers were washed with brine, dried over MgSO<sub>4</sub>, filtered, and concentrated *in vacuo*. The crude residue was purified using chromatography (20-75% Water/ CH<sub>3</sub>CN /TFA) to afford the pure spirohydantoin product **17b** (0.073 g, 84% yield) as white powdery solid. <sup>1</sup>H NMR (400 MHz, DMSO-*d*<sub>6</sub>) δ ppm 10.9 (br, s) 8.29 (s, 1 H) 6.87 (d, *J*=9.3 Hz, 1 H) 6.72 (dd, *J*=9.0, 3.0 Hz, 1 H) 6.64 (d, *J*=3.0 Hz, 1 H) 3.93 (dd, *J*=11.4, 3.4 Hz, 1 H) 3.55 - 3.72 (m, 4 H) 3.54 (td, *J*=9.0, 3.0 Hz, 1 H) 3.19 - 3.47 (m, 2 H) 3.09 (dd, *J*=10.4, 3.1 Hz, 1 H) 2.64 - 2.77 (m, 2 H); <sup>13</sup>C NMR (100 MHz, DMSO-*d*<sub>6</sub>) δ 175.6, 156.4, 152.2, 138.9, 120.9, 114.7, 113.9, 112.9, 66.1, 65.7, 60.5, 57.0, 55.2, 46.6, 37.2; HRMS (ES) MH<sup>+</sup> calcd for C<sub>15</sub>H<sub>18</sub>N<sub>3</sub>O<sub>4</sub> 304.1292, found 304.1303.

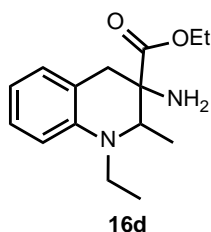

**Ethyl 3-amino-1-ethyl-2-methyl-1,2,3,4-tetrahydroquinoline-3-carboxylate, 16d.** The major diastereomers was isolated using SFC with DEAP (4.6 mm x250 mm 5μm); mobile phase A: CO<sub>2</sub>, mobile phase B: EtOH. **Diastereomer 1 (16d):** <sup>1</sup>H NMR (400 MHz, CDCl<sub>3</sub>) δ ppm 6.97 - 7.15 (m, 2 H) 6.64 (t, *J*=7.1 Hz, 1 H) 6.59 (d, *J*=7.9 Hz, 1 H) 4.03 - 4.21 (m, 2 H) 3.59 - 3.77 (m, 1 H) 3.33 - 3.50 (m, 1 H) 3.16 - 3.29 (m, 2 H) 2.75 (d, *J*=16.1 Hz, 1 H) 1.09 - 1.22 (m, 9 H); <sup>13</sup>C NMR (100 MHz, CDCl<sub>3</sub>) δ 175.3, 142.6, 129.1, 127.1, 119.9, 116.2, 111.0, 60.9, 58.3, 43.8, 34.3, 14.0, 13.0, 12.8; HRMS (ES) MH<sup>+</sup> calcd for C<sub>15</sub>H<sub>23</sub>N<sub>2</sub>O<sub>2</sub> 263.1715, found 263.1722.

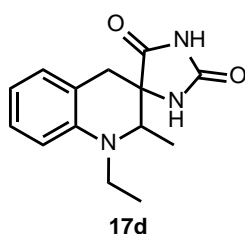

**1'-Ethyl-2'-methyl-2',4'-dihydro-1'H-spiro[imidazolidine-4,3'-quinoline]-2,5-dione, 17d.** To a 25 mL round bottom flask equipped with magnetic stirrer were added the diastereomerically pure amine **16d** (0.21 g, 0.80 mmol) from above and potassium cyanate (0.13 g, 1.6 mmol). The mixture was dissolved in acetic acid (10 mL) and the resulting solution was

stirred overnight at rt. The reaction was concentrated *in vacuo*, re-dissolved in EtOAc and washed with water and brine. The organic layer was separated and dried over MgSO<sub>4</sub>, filtered, and concentrated *in vacuo* to afford the crude urea derivative. This material was then transferred to a 25 mL round bottom flask, dissolved in EtOH, and NaOEt in EtOH (0.35 mL, 0.94 mmol) was added. The resulting brown solution was stirred at rt for about 30 min to 1 h until all the urea has been converted to the spirohydantoin derivative (as monitored by UPLC-MS). When the reaction was complete, the solution was concentrated *in vacuo*, quenched with saturated aqueous NH<sub>4</sub>Cl solution and then extracted with EtOAc 3x. The combined organic layers were washed with brine, dried over MgSO<sub>4</sub>, filtered, and concentrated *in vacuo*. The crude residue was purified using chromatography to afford the pure spirohydantoin product **17d** (0.179 g, 88% yield) as white powdery solid. <sup>1</sup>H NMR (400 MHz, DMSO-*d*<sub>6</sub>) δ ppm 10.66 (s, 1 H) 8.04 (s, 1 H) 7.02 (t, *J*=7.7 Hz, 1 H) 6.93 (d, *J*=7.1 Hz, 1 H) 6.65 (d, *J*=8.0 Hz, 1 H) 6.53 (t, *J*=7.0 Hz, 1 H) 3.41 - 3.52 (m, 2 H) 3.15 - 3.31 (m, 1 H) 2.92 - 3.02 (d, *J*=20 Hz, 1 H) 2.78 - 2.83 (d, *J*=20 Hz, 1 H) 2.48 - 2.57 (m, 1 H) 1.00 - 1.13 (m, 5 H); <sup>13</sup>C NMR (100 MHz, DMSO-*d*<sub>6</sub>) δ 174.9, 141.4, 130.2, 128.2, 116.9, 116.0, 116.6, 61.9, 59.1, 44.6, 32.1, 14.3, 13.5; HRMS (ES) MH<sup>+</sup> calcd for C<sub>14</sub>H<sub>18</sub>N<sub>3</sub>O<sub>2</sub> 260.1354, found 260.1370.

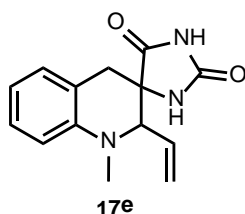

**1'-Methyl-2'-vinyl-2',4'-dihydro-1'H-spiro[imidazolidine-4,3'-quinoline]-2,5-dione, 17e.** Spirohydantoin **17e** was synthesized *via* **Procedure B**. To a 25 mL round bottom flask equipped with magnetic stirrer were added the diastereomeric mixture of amine from above and potassium cyanate (1.2 equiv). The mixture was dissolved in acetic acid and the resulting solution was stirred overnight at rt. The reaction was concentrated *in vacuo*, re-dissolved in EtOAc and washed with water and brine. The organic layer was separated and dried over MgSO<sub>4</sub>, filtered, and concentrated *in vacuo* to afford the crude urea derivative. This material (diastereomeric mixture of urea derivatives) was then transferred to a 25 mL round bottom flask, dissolved in EtOH, and NaOEt in EtOH was added. The resulting brown solution was stirred at rt for about 30 min to 1 h until all the urea has been converted to the spirohydantoin derivative (as monitored by UPLC-MS). When the reaction was complete, solution was

concentrated *in vacuo*, quenched with saturated aqueous NH<sub>4</sub>Cl solution and then extracted with EtOAc 3x. The combined organic layers were washed with brine, dried over MgSO<sub>4</sub>, filtered, and concentrated *in vacuo*. The crude residue was purified using chromatography to afford the two spirohydantoin diastereomers as white powdery solids. **17e-dia-1** (0.2 g, 52% yield): <sup>1</sup>H NMR (400 MHz, DMSO-*d*<sub>6</sub>) δ ppm 10.68 (s, 1 H) 8.09 (s, 1 H) 7.08 (t, *J*=7.4 Hz, 1 H) 6.95 (d, *J*=7.1 Hz, 1 H) 6.68 (d, *J*=8.0 Hz, 1 H) 6.61 (t, *J*=7.0 Hz, 1 H) 5.67 (ddd, *J*=17.2, 10.2, 8.3 Hz, 1 H) 5.33 (dd, *J*=12.0, 4.0 Hz, 1 H) 5.22 (d, *J*=16.0 Hz, 1 H) 3.87 (d, *J*=8.0 Hz, 1 H) 3.06 (d, *J*=16.1 Hz, 1 H) 2.82 (s, 3H) 2.74 - 2.78 (d, *J*=16.1 Hz, 1 H); <sup>13</sup>C NMR (100 MHz, DMSO-*d*<sub>6</sub>) δ 175.6, 156.5, 144.8, 134.4, 128.9, 127.4, 120.4, 118.5, 116.4, 111.6, 65.1, 61.9, 36.2, 34.9; HRMS (ES) MH<sup>+</sup> calcd for C<sub>14</sub>H<sub>16</sub>N<sub>3</sub>O<sub>2</sub> 258.1198, found 258.1201. **17e-dia-2** (0.13 g, 34 % yield): <sup>1</sup>H NMR (400 MHz, DMSO-*d*<sub>6</sub>) δ ppm 10.76 (s, 1 H) 8.08 - 8.15 (m, 1 H) 7.08 (t, *J*=7.3 Hz, 1 H) 6.95 (d, *J*=7.3 Hz, 1 H) 6.57 - 6.65 (m, 2 H) 5.82 (ddd, *J*=16.9, 10.5, 5.9 Hz, 1 H) 5.11 (dt, *J*=10.3, 1.5 Hz, 1 H) 4.92 (dt, *J*=17.2, 1.6 Hz, 1 H) 3.88 (dd, *J*=5.9, 1.4 Hz, 1 H) 3.10 (d, *J*=16.3 Hz, 1 H) 2.91 (s, 3 H) 2.59 - 2.74 (d, *J*=16.3 Hz, 1 H); <sup>13</sup>C NMR (100 MHz, DMSO-*d*<sub>6</sub>) δ 175.3, 156.1, 143.6, 132.9, 129.0, 127.5, 116.9, 116.0, 116.0, 110.6, 66.7, 60.7, 37.8, 32.6; HRMS (ES) MH<sup>+</sup> calcd for C<sub>14</sub>H<sub>16</sub>N<sub>3</sub>O<sub>2</sub> 258.1198, found 258.1199.

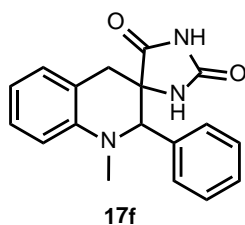

**1'-Methyl-2'-phenyl-2',4'-dihydro-1'H-spiro[imidazolidine-4,3'-quinoline]-2,5-dione,**

**17f.** Spirohydantoin **17f** was synthesized *via* **Procedure B**. To a 25 mL round bottom flask equipped with magnetic stirrer were added the diastereomeric mixture of amine (0.4 g, 1.29 mmol) and potassium cyanate (0.125 g, 1.55 mmol). The mixture was dissolved in acetic acid (10 mL) and the resulting solution was stirred overnight at rt. The reaction was then concentrated *in vacuo*, then re-dissolved in EtOAc and washed with water and brine. The organic layer was separated and dried over MgSO<sub>4</sub>, filtered, and concentrated *in vacuo* to afford the crude urea derivative. This material (diastereomeric mixture of urea derivatives) was then transferred to a 25 mL round bottom flask, dissolved in EtOH (10 mL), and NaOEt in EtOH (0.6 mL, 1.55 mmol) was added. The resulting brown solution was stirred at rt for about 30 min to 1 h until all the urea has been converted to the spirohydantoin derivative (as monitored

by UPLC-MS). When the reaction was complete, the solution was concentrated *in vacuo*, quenched with saturated aqueous NH<sub>4</sub>Cl solution and then extracted with EtOAc 3x. The combined organic layers were washed with brine, dried over MgSO<sub>4</sub>, filtered, and concentrated *in vacuo*. The crude residue was purified using chromatography to afford the two spirohydantoin diastereomers as white powdery solids. **17f-dia-1** (0.245 g, 62% yield, product identical to spirohydantoin **15**); **17f-dia-2** (0.144 g, 36 % yield): <sup>1</sup>H NMR (400 MHz, DMSO-*d*<sub>6</sub>) δ ppm 10.33 (br. s., 1 H) 8.20 (s, 1 H) 7.25 - 7.36 (m, 5 H) 7.12 (t, *J*=7.3 Hz, 1 H) 7.01 (d, *J*=7.3 Hz, 1 H) 6.80 (d, *J*=8.0 Hz, 1 H) 6.66 (t, *J*=7.0 Hz, 1 H) 4.56 (s, 1 H) 3.27 - 3.31 (d, *J*=15.8 Hz, 1 H) 2.80 (d, *J*=15.8 Hz, 1 H) 2.63 (s, 3 H); <sup>13</sup>C NMR (100 MHz, DMSO-*d*<sub>6</sub>) δ 174.4, 154.9, 144.9, 135.7, 127.8, 127.7, 126.8, 126.5, 117.8, 115.6, 111.8, 65.6, 61.7, 36.6, 34.9; HRMS (ES) MH<sup>+</sup> calcd for C<sub>18</sub>H<sub>18</sub>N<sub>3</sub>O<sub>2</sub> 308.1394, found 308.1381.

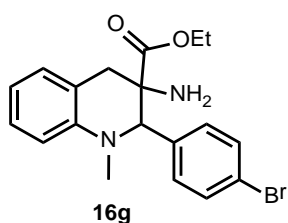

**Ethyl 3-amino-2-(4-bromophenyl)-1-methyl-1,2,3,4-tetrahydroquinoline-3-carboxylate, 16g.** The major diastereomer was isolated using SFC with Viridis Silica (4.6 mm x 150 mm 5μm); mobile phase A: CO<sub>2</sub>, mobile phase B: EtOH, gradient 10-30% B in 5 min. **Diastereomer 1 (16g)**: <sup>1</sup>H NMR (400 MHz, CDCl<sub>3</sub>) δ ppm 7.27 - 7.47 (d, *J*=8.0 Hz, 2 H) 7.15 - 7.24 (m, 1 H) 7.00 (d, *J*=8.0 Hz, 2 H) 6.82 - 6.99 (m, 1 H) 6.50 - 6.72 (m, 2 H) 4.58 (s, 1 H) 4.02 (q, *J*=7.0 Hz, 3 H) 3.20 (d, *J*=15.6 Hz, 1 H) 2.73 (s, 3 H) 2.61 (d, *J*=15.6 Hz, 1 H) 1.05 (t, *J*=8.0 Hz, 3 H); <sup>13</sup>C NMR (100 MHz, CDCl<sub>3</sub>) δ 171.6, 143.3, 138.0, 131.6, 130.3, 128.8, 128.5, 122.2, 117.3, 116.9, 110.1, 70.2, 62.0, 58.9, 37.7, 30.8, 13.7; HRMS (ES) MH<sup>+</sup> calcd for C<sub>19</sub>H<sub>22</sub>BrN<sub>2</sub>O<sub>2</sub> 389.0820, found 389.0991.

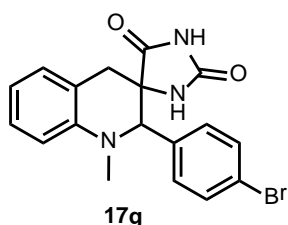

**2'-(4-Bromophenyl)-1'-methyl-2',4'-dihydro-1'H-spiro[imidazolidine-4,3'-quinoline]-2,5-dione, 17g.** To a 25 mL round bottom flask equipped with magnetic stirrer were added the diastereomerically pure amine **16g** (0.04 g, 0.10 mmol) from above and potassium cyanate (0.017 g, 0.21 mmol). The mixture was dissolved in acetic acid (5 mL) and the resulting

solution was stirred overnight at rt. The reaction was concentrated *in vacuo*, re-dissolved in EtOAc and washed with water and brine. The organic layer was separated and dried over MgSO<sub>4</sub>, filtered, and concentrated *in vacuo* to afford the crude urea derivative. This material was then transferred to a 25 mL round bottom flask, dissolved in EtOH, and NaOEt in EtOH (0.35 mL, 0.94 mmol) was added. The resulting brown solution was stirred at rt for about 30 min to 1 h until all the urea has been converted to the spirohydantoin derivative (as monitored by UPLC-MS). When the reaction was complete, solution was concentrated *in vacuo*, quenched with saturated aqueous NH<sub>4</sub>Cl solution and then extracted with EtOAc 3x. The combined organic layers were washed with brine, dried over MgSO<sub>4</sub>, filtered, and concentrated *in vacuo*. The crude residue was purified using chromatography to afford the pure spirohydantoin product **17g** (0.03 g, 78% yield) as a white powdery solid. <sup>1</sup>H NMR (400 MHz, DMSO-*d*<sub>6</sub>) δ ppm 10.42 (s, 1 H) 8.21 (s, 1 H) 7.55 (d, *J*=7.8 Hz, 2 H) 7.22 (d, *J*=7.8 Hz, 2 H) 7.13 (t, *J*=7.3 Hz, 1 H) 7.01 (d, *J*=7.0 Hz, 1 H) 6.80 (d, *J*=8.0 Hz, 1 H) 6.67 (t, *J*=7.1 Hz, 1 H) 4.58 (s, 1 H) 3.24 (d, *J*=15.8 Hz, 1 H) 2.80 (d, *J*=15.8 Hz, 1 H) 2.63 (s, 3 H); <sup>13</sup>C NMR (100 MHz, DMSO-*d*<sub>6</sub>) δ 175.3, 156.0, 145.9, 136.4, 130.9, 128.9, 127.6, 121.3, 118.9, 117.0, 112.9, 66.1, 62.6, 54.8, 37.8, 35.6; HRMS (ES) MH<sup>+</sup> calcd for C<sub>18</sub>H<sub>17</sub>BrN<sub>3</sub>O<sub>2</sub> 386.0499, found 386.0511.

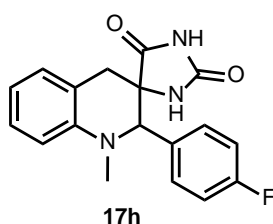

**2'-(4-Fluorophenyl)-1'-methyl-2',4'-dihydro-1'H-spiro[imidazolidine-4,3'-quinoline]-2,5-dione, 17h.** Spirohydantoin **17h** was synthesized *via* **Procedure B**. To a 25 mL round bottom flask equipped with magnetic stirrer were added the diastereomeric mixture of amine (0.449 g, 1.37 mmol) from above and potassium cyanate (0.133 g, 1.64 mmol). The mixture was dissolved in acetic acid (10 mL) and the resulting solution was stirred overnight at rt. The reaction was then concentrated *in vacuo*, then re-dissolved in EtOAc and washed with water and brine. The organic layer was separated and dried over MgSO<sub>4</sub>, filtered, and concentrated *in vacuo* to afford the crude urea derivative. This material (diastereomeric mixture of urea derivatives) was then transferred to a 25 mL round bottom flask, dissolved in EtOH (10 mL), and NaOEt in EtOH (0.6 mL, 1.64 mmol) was added. The resulting brown solution was stirred at rt for about 30 min to 1 h until all the urea has been converted to the spirohydantoin derivative (as monitored by UPLC-MS). When the reaction was complete, solution was concentrated *in*

*vacuo*, quenched with saturated aqueous NH<sub>4</sub>Cl solution and then extracted with EtOAc 3x. The combined organic layers were washed with brine, dried over MgSO<sub>4</sub>, filtered, and concentrated *in vacuo*. The crude residue was purified using chromatography to afford the two spirohydantoin diastereomers as white powdery solids. **17h-dia-1** (0.245 g, 61% yield): <sup>1</sup>H NMR (500 MHz, DMSO-*d*<sub>6</sub>) δ ppm 10.62 (br. s., 1 H) 8.23 (s, 1 H) 7.00 - 7.16 (m, 6 H) 6.69 (d, *J*=8.1 Hz, 1 H) 6.65 (t, *J*=7.3 Hz, 1 H) 4.49 (s, 1 H) 3.34 (s, 5 H) 3.03 (d, *J*=16.4 Hz, 1 H) 2.77 (s, 3H) 2.72 - 2.83 (d, *J*=16.4 Hz, 1 H); <sup>19</sup>F NMR (470 MHz, DMSO-*d*<sub>6</sub>) δ -73.4; <sup>13</sup>C NMR (125 MHz, CDCl<sub>3</sub>) δ 174.2, 160.6 (d, *J*<sub>CF</sub>=241.3 Hz), 156.1, 144.6, 134.4, 129.8, 129.0, 127.7, 117.3, 116.2, 114.6 (d, *J*<sub>CF</sub>=21.3 Hz), 110.7, 67.8, 61.3, 37.6, 32.5; HRMS (ES) MH<sup>+</sup> calcd for C<sub>17</sub>H<sub>18</sub>FN<sub>3</sub>O<sub>2</sub> 326.1299, found 326.1293. **17h-dia-2** (0.145 g, 33 % yield): <sup>1</sup>H NMR (500 MHz, DMSO-*d*<sub>6</sub>) δ ppm 10.5 (br s, 1H), 8.36 (s, 1 H) 7.43 (t, *J*=6.5 Hz, 2 H) 7.24 - 7.34 (m, 3 H) 7.14 (d, *J*=7.3 Hz, 1 H) 6.94 (d, *J*=8.2 Hz, 1 H) 6.80 (t, *J*=7.2 Hz, 1 H) 4.72 (s, 1 H) 3.40 (d, *J*=15.8 Hz, 1 H) 2.93 (d, *J*=15.8 Hz, 1 H) 2.75 (s, 3 H) ; <sup>19</sup>F NMR (470 MHz, DMSO-*d*<sub>6</sub>) δ -73.4; <sup>13</sup>C NMR (125 MHz, CDCl<sub>3</sub>) δ 175.4, 162.8 (d, *J*<sub>CF</sub>=242.5 Hz), 156.1, 145.9, 133.0, 130.7, 128.9, 127.6, 118.9, 116.9, 114.9 (d, *J*<sub>CF</sub>=21.3 Hz), 112.9, 65.9, 62.7, 37.6, 35.8; HRMS (ES) MH<sup>+</sup> calcd for C<sub>17</sub>H<sub>18</sub>FN<sub>3</sub>O<sub>2</sub> 326.1299, found 326.1300.

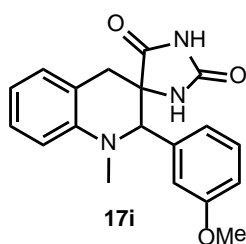

**2'-(3-Methoxyphenyl)-1'-methyl-2',4'-dihydro-1'H-spiro[imidazolidine-4,3'-quinoline]-2,5-dione, 17i.** Spirohydantoin **17i** was synthesized *via* **Procedure B**. To a 25 mL round bottom flask equipped with magnetic stirrer were added the diastereomeric mixture of amine (0.33 g, 0.97 mmol) and potassium cyanate (0.157 g, 1.94 mmol). The mixture was dissolved in acetic acid (5 mL) and the resulting solution was stirred overnight at rt. The reaction was then heated to 90 °C for 24 h until all the urea has been converted to the spirohydantoin derivative (as monitored by UPLC-MS). When the reaction was complete, the solution was cooled to rt, diluted with water and then extracted with EtOAc 3x. The combined organic layers were washed with brine, dried over MgSO<sub>4</sub>, filtered, and concentrated *in vacuo*. The crude residue was purified using chromatography to afford the two spirohydantoin diastereomers as white powdery solids. **17i-dia-1** (0.209 g, 64% yield): <sup>1</sup>H NMR (500 MHz, DMSO-*d*<sub>6</sub>) δ ppm 10.78 (s, 1 H) 8.40 (s, 1 H) 7.28 - 7.43 (m, 2 H) 7.21 (d, *J*=7.3 Hz, 1 H) 7.03 (d, *J*=8.1 Hz, 1

H) 6.78 - 6.92 (m, 4 H) 4.60 (s, 1 H) 3.86 (s, 3 H) 3.27 (d,  $J=16.4$  Hz, 1 H) 3.00 (d,  $J=16.4$  Hz, 1 H) 2.96 (s, 3H);  $^{13}\text{C}$  NMR (100 MHz,  $\text{DMSO-}d_6$ )  $\delta$  175.5, 158.9, 156.1, 146.1, 138.4, 128.9, 127.6, 121.1, 118.9, 116.9, 114.4, 113.6, 112.8, 66.6, 62.8, 55.0, 37.6, 36.1; HRMS (ES)  $\text{MH}^+$  calcd for  $\text{C}_{19}\text{H}_{20}\text{N}_3\text{O}_3$  338.1499, found 338.1488. **17i-dia-2** (0.087 g, 26 % yield):  $^1\text{H}$  NMR (400 MHz,  $\text{DMSO-}d_6$ )  $\delta$  ppm 10.59 (br. s., 1 H) 8.19 (s, 1 H) 7.07 - 7.23 (m, 2 H) 7.02 (d,  $J=7.0$  Hz, 1 H) 6.77 - 6.91 (m, 1 H) 6.58 - 6.73 (m, 4 H) 4.40 (s, 1 H) 3.66 (s, 3 H) 3.08 (d,  $J=16.3$  Hz, 1 H) 2.81 (d,  $J=16.3$  Hz, 1 H) 2.77 (s, 3 H);  $^{13}\text{C}$  NMR (100 MHz,  $\text{DMSO-}d_6$ )  $\delta$  174.2, 158.6, 156.0, 144.8, 139.7, 128.9, 128.8, 127.6, 120.1, 117.6, 116.2, 114.4, 112.5, 110.7, 68.6, 61.5, 54.8, 37.7, 32.9; HRMS (ES)  $\text{MH}^+$  calcd for  $\text{C}_{19}\text{H}_{20}\text{N}_3\text{O}_3$  338.1499, found 338.1504.

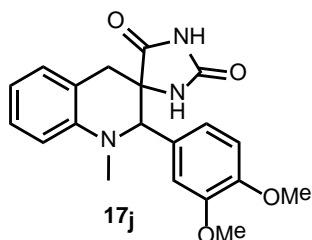

**2'-(3,4-Dimethoxyphenyl)-1'-methyl-2',4'-dihydro-1'H-spiro[imidazolidine-4,3'-**

**quinoline]-2,5-dione, 17j.** Spirohydantoin **17j** was synthesized *via* **Procedure B**. To a 25 mL round bottom flask equipped with magnetic stirrer were added the diastereomeric mixture of amine (0.46g, 1.24 mmol) from above and potassium cyanate (0.201 g, 2.48 mmol). The mixture was dissolved in acetic acid (10 mL) and the resulting solution was stirred overnight at rt. The reaction was then concentrated *in vacuo*, re-dissolved in EtOAc and washed with water and brine. The organic layer was separated and dried over  $\text{MgSO}_4$ , filtered, and concentrated *in vacuo* to afford the crude urea derivative. This material (diastereomeric mixture of urea derivatives) was then transferred to a 25 mL round bottom flask, dissolved in EtOH, and NaOEt in EtOH (0.6 mL, 1.45 mmol) was added. The resulting brown solution was stirred at rt for about 30 min to 1 h until all the urea has been converted to the spirohydantoin derivative (as monitored by UPLC-MS). When the reaction was complete, the solution was concentrated *in vacuo*, quenched with saturated aqueous  $\text{NH}_4\text{Cl}$  solution and then extracted with EtOAc 3x. The combined organic layers were washed with brine, dried over  $\text{MgSO}_4$ , filtered, and concentrated *in vacuo*. The crude residue was purified using chromatography to afford the two spirohydantoin diastereomers as white powdery solids. **17j-dia-1** (0.165 g, 37% yield)  $^1\text{H}$  NMR (500 MHz,  $\text{DMSO-}d_6$ )  $\delta$  10.30 (s, 1 H) 8.25 (s, 1 H) 7.13 (t,  $J=7.8$  Hz, 1 H) 7.01 (d,  $J=7.7$  Hz, 1 H) 6.99 (d,  $J=8.1$  Hz, 1 H) 6.89 (d,  $J=8.5$  Hz, 1 H) 6.81 (d,  $J=8.2$  Hz, 1 H) 6.75 (d,  $J=8.1$  Hz,



1 H) 6.68 (t,  $J=7.2$  Hz, 1 H) 4.48 (s, 1 H) 3.75 (s, 3 H) 3.71 (s, 3 H) 3.28 (d,  $J=15.8$  Hz, 1 H) 2.78 (d,  $J=15.8$  Hz, 1 H) 2.64 (s, 3 H);  $^{13}\text{C}$  NMR (125 MHz,  $\text{DMSO-}d_6$ )  $\delta$  175.6, 158.9, 156.3, 148.5, 148.2, 146.1, 128.9, 128.8, 127.6, 121.1, 118.9, 116.8, 112.9, 112.0, 110.7, 66.2, 62.9, 55.6, 55.3, 37.3, 36.2; HRMS (ES)  $\text{MH}^+$  calcd for  $\text{C}_{20}\text{H}_{22}\text{N}_3\text{O}_4$  368.1605, found 368.1613. **17j-dia-2** (0.220 g, 50 % yield):  $^1\text{H}$  NMR (500 MHz,  $\text{DMSO-}d_6$ )  $\delta$  10.52 (s, 1 H) 8.14 (s, 1 H) 7.13 (t,  $J=7.9$  Hz, 1 H) 7.00 (d,  $J=7.3$  Hz, 1 H) 6.83 (d,  $J=8.2$  Hz, 1 H) 6.57 - 6.75 (m, 4 H) 4.34 (s, 1 H) 3.72 (s, 3H), 3.60 (s, 3H), 3.06 (d,  $J=16.4$  Hz, 1 H) 2.69 - 2.85 (d,  $J=16.4$  Hz, 1 H) 2.76 (s, 3 H);  $^{13}\text{C}$  NMR (125 MHz,  $\text{DMSO-}d_6$ )  $\delta$  174.4, 156.1, 148.2, 147.7, 145.0, 130.3, 128.8, 127.6, 119.9, 117.8, 116.2, 112.3, 111.0, 110.9, 68.2, 61.7, 55.3 (2 C), 37.7, 33.2; HRMS (ES)  $\text{MH}^+$  calcd for  $\text{C}_{20}\text{H}_{22}\text{N}_3\text{O}_4$  368.1605, found 368.1597.

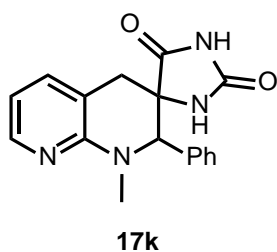

**1'-methyl-2'-phenyl-2',4'-dihydro-1'H-spiro[imidazolidine-4,3'-[1,8]naphthyridine]-2,5-dione, 17k.** Spirohydanotoin **17k** was synthesized *via* **Procedure B**. To a 25 mL round bottom flask equipped with magnetic stirrer were added the diastereomeric mixture of amine (0.46g, 1.24 mmol) from above and potassium cyanate (0.201 g, 2.48 mmol). The mixture was dissolved in acetic acid (10 mL) and the resulting solution was stirred overnight at rt. The reaction was then concentrated *in vacuo*, re-dissolved in EtOAc and washed with water and brine. The organic layer was separated and dried over  $\text{MgSO}_4$ , filtered, and concentrated *in vacuo* to afford the crude urea derivative. This material (diastereomeric mixture of urea derivatives) was then transferred to a 25 mL round bottom flask, dissolved in EtOH, and NaOEt in EtOH (0.6 mL, 1.45 mmol) was added. The resulting brown solution was stirred at rt for about 30 min to 1 h until all the urea has been converted to the spirohydanotoin derivative (as monitored by UPLC-MS). When the reaction was complete, the solution was concentrated *in vacuo*, quenched with saturated aqueous  $\text{NH}_4\text{Cl}$  solution and then extracted with EtOAc 3x. The combined organic layers were washed with brine, dried over  $\text{MgSO}_4$ , filtered, and concentrated *in vacuo*. The crude residue was purified using chromatography to afford the two spirohydanotoin diastereomers as white powdery solids. **17k-dia-1** (0.165 g, 37% yield):  $^1\text{H}$

NMR (500 MHz, DMSO- $d_6$ )  $\delta$  ppm 10.62 (br. s., 1 H) 8.36 (s, 1 H) 8.04 (dd,  $J=5.0, 1.6$  Hz, 1 H) 7.25 - 7.34 (m, 4 H) 7.02 - 7.08 (m, 2 H) 6.61 (dd,  $J=7.1, 4.9$  Hz, 1 H) 4.60 (s, 1 H) 3.34 (s, 6 H) 3.06 (d,  $J=16.4$  Hz, 1 H) 2.91 (s, 3 H) 2.82 (d,  $J=16.1$  Hz, 1 H);  $^{13}\text{C}$  NMR (125 MHz, DMSO- $d_6$ )  $\delta$  174.0, 156.0, 154.9, 146.1, 137.5, 136.1, 127.9, 127.6, 112.9, 112.2, 68.3, 60.9, 35.4, 32.4; HRMS (ES)  $\text{MH}^+$  calcd for  $\text{C}_{17}\text{H}_{17}\text{N}_4\text{O}_2$  309.1346, found 309.1354. **17k-dia-2** (0.220 g, 50 % yield):  $^1\text{H}$  NMR (500 MHz, DMSO- $d_6$ )  $\delta$  10.43 (br. s., 1 H) 8.24 (s, 1 H) 8.04 (dd,  $J=4.7, 1.3$  Hz, 1 H) 7.30 - 7.39 (m, 4 H) 7.25 (d,  $J=6.6$  Hz, 2 H) 6.63 (dd,  $J=7.3, 5.0$  Hz, 1 H) 4.75 (s, 1 H) 3.25 (d,  $J=15.8$  Hz, 1 H) 2.85 (d,  $J=15.8$  Hz, 1 H) 2.79 (s, 3 H);  $^{13}\text{C}$  NMR (100 MHz, DMSO- $d_6$ )  $\delta$  175.4, 155.9, 146.0, 136.2, 128.8, 128.1, 127.9, 113.9, 112.6, 66.2, 61.7, 34.9, 29.9; HRMS (ES)  $\text{MH}^+$  calcd for  $\text{C}_{17}\text{H}_{17}\text{N}_4\text{O}_2$  309.1346, found 309.1359.

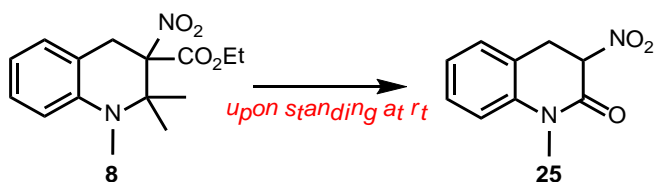

**Ethyl 1,2,2-trimethyl-3-nitro-1,2,3,4-tetrahydroquinoline-3-carboxylate, 8.**  $^1\text{H}$  NMR (400 MHz,  $\text{CDCl}_3$ )  $\delta$  ppm 7.09 (t,  $J=8.0$  Hz, 1 H) 7.00 (d,  $J=8.0$  Hz, 1 H) 6.68 (t,  $J=8.0$  Hz, 1 H) 6.63 (d,  $J=8.0$  Hz, 1 H) 4.13 - 4.26 (m, 2 H) 3.70 (d,  $J=17.6$  Hz, 1 H) 3.43 (d,  $J=17.6$  Hz, 1 H) 2.80 (s, 3 H) 1.59 (s, 3 H) 1.36 (s, 3 H);  $^{13}\text{C}$  NMR (100 MHz,  $\text{CDCl}_3$ )  $\delta$  165.6, 144.6, 128.3, 127.7, 118.5, 117.7, 113.4, 95.5, 62.6, 59.3, 34.5, 31.1, 23.2, 22.6, 13.8; HRMS (ES)  $\text{MH}^+$  calcd for  $\text{C}_{15}\text{H}_{20}\text{N}_2\text{O}$  292.1423, not determined due to instability.

**1-methyl-3-nitro-3,4-dihydroquinolin-2(1H)-one, 25.** This material was formed from the decomposition of tetrahydroquinoline-nitroester **8** after standing at rt overnight.  $^1\text{H}$  NMR (400 MHz,  $\text{CDCl}_3$ )  $\delta$  ppm 7.37 (t,  $J=7.8$  Hz, 1 H) 7.22 - 7.29 (m, 1 H) 7.13 (t,  $J=7.6$  Hz, 1 H) 7.09 (d,  $J=8.2$  Hz, 1 H) 5.37 (dd,  $J=9.8, 5.5$  Hz, 1 H) 3.80 (dd,  $J=15.7, 9.9$  Hz, 1 H) 3.48 (s, 3H) 3.39 - 3.44 (dd,  $J=12.0, 4.0$  Hz, 1H);  $^{13}\text{C}$  NMR (100 MHz,  $\text{CDCl}_3$ )  $\delta$  160.8, 138.8, 128.9, 128.7, 124.2, 120.4, 115.4, 83.6, 30.9, 30.5; HRMS (ES)  $\text{MH}^+$  calcd for  $\text{C}_{10}\text{H}_{10}\text{N}_2\text{O}_3$  206.0691, did not ionize either by ES+ or ES-.

## 11. $^1\text{H}$ NMR and $^{13}\text{C}$ NMR spectra of spirohydantoin products.

9/2/2015 3:45:31 PM

| OriginalDateForRelativeTime 2015-08-14T14:40:00 |                      | Multiplets Integrals Sum 0.00 |                                                          | Number of Nuclei 0 H's          |              |                        |        |
|-------------------------------------------------|----------------------|-------------------------------|----------------------------------------------------------|---------------------------------|--------------|------------------------|--------|
| Acquisition Time (sec)                          | 2.6542               | Comment                       | A3 300MHz proton                                         | QNP_32 CDCl3 (C:\u) fbriones 12 | Date         | 14 Aug 2015 14:40:00   |        |
| Date Stamp                                      | 14 Aug 2015 14:40:00 | File Name                     | C:\Users\kmmw459\Desktop\OL-NMR\EN07754-ME-BN1\data\1\1r |                                 |              |                        |        |
| Frequency (MHz)                                 | 300.13               | Nucleus                       | 1H                                                       | Number of Transients            | 32           | Origin                 | spect  |
| Original Points Count                           | 16384                | Owner                         | usbodlab                                                 | Points Count                    | 32768        | Pulse Sequence         | zg30   |
| Receiver Gain                                   | 128.00               | SW(cyclical) (Hz)             | 6172.84                                                  | Solvent                         | CHLOROFORM-d |                        |        |
| Spectrum Offset (Hz)                            | 1853.4569            | Spectrum Type                 | STANDARD                                                 | Sweep Width (Hz)                | 6172.65      | Temperature (degree C) | 26.960 |

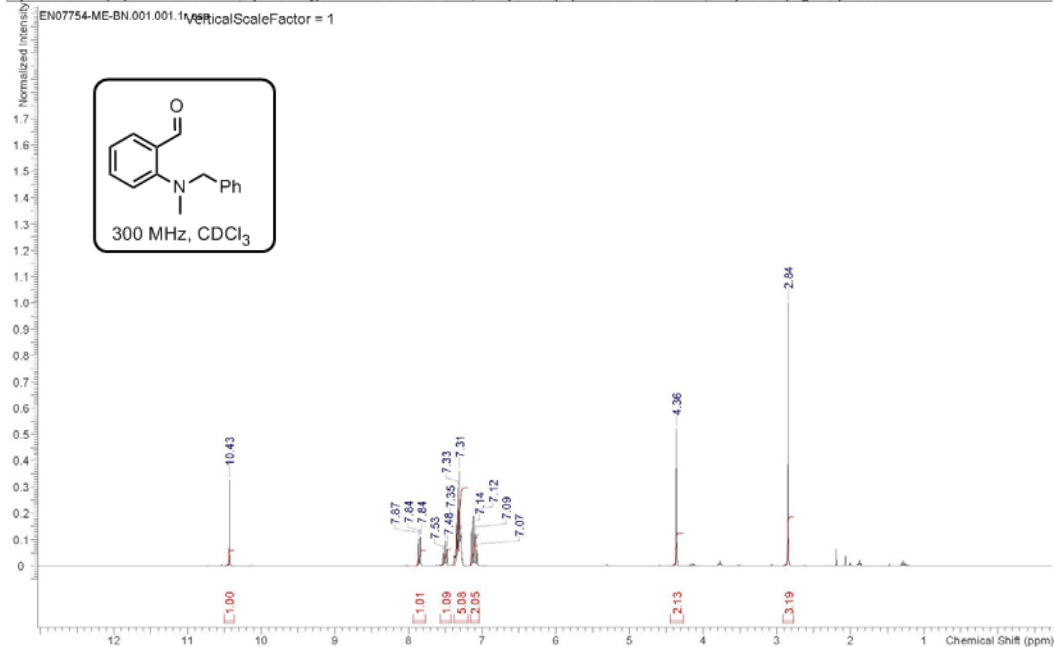

9/2/2015 3:06:38 PM

| OriginalDateForRelativeTime 2015-08-14T20:42:40 |                      | Number of Nuclei 0 C's |                                                          |                                   |              |                        |        |
|-------------------------------------------------|----------------------|------------------------|----------------------------------------------------------|-----------------------------------|--------------|------------------------|--------|
| Acquisition Time (sec)                          | 1.8612               | Comment                | A3 300MHz carbon                                         | QNP_2500 CDCl3 (C:\u) fbriones 12 | Date         | 14 Aug 2015 20:42:40   |        |
| Date Stamp                                      | 14 Aug 2015 20:42:40 | File Name              | C:\Users\kmmw459\Desktop\OL-NMR\EN07754-ME-BN2\data\1\1r |                                   |              |                        |        |
| Frequency (MHz)                                 | 75.48                | Nucleus                | 13C                                                      | Number of Transients              | 2500         | Origin                 | spect  |
| Original Points Count                           | 32768                | Owner                  | usbodlab                                                 | Points Count                      | 32768        | Pulse Sequence         | zgpg30 |
| Receiver Gain                                   | 6502.00              | SW(cyclical) (Hz)      | 17605.63                                                 | Solvent                           | CHLOROFORM-d |                        |        |
| Spectrum Offset (Hz)                            | 7547.9321            | Spectrum Type          | STANDARD                                                 | Sweep Width (Hz)                  | 17605.10     | Temperature (degree C) | 26.960 |

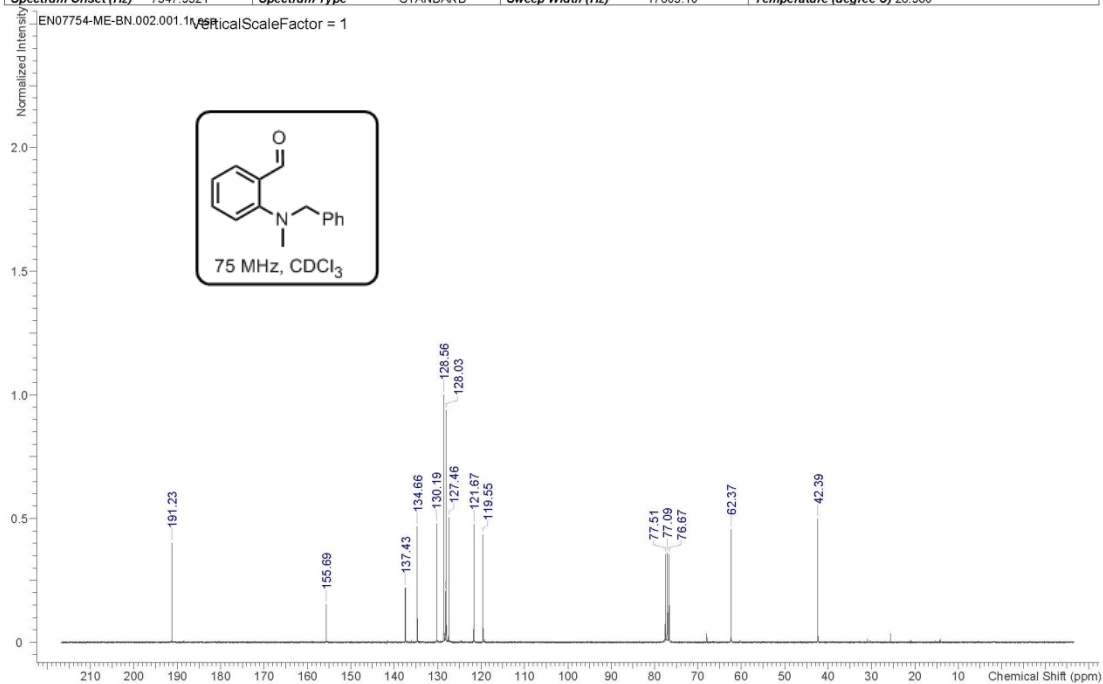

9/2/2015 3:43:48 PM

| OriginalDateForRelativeTime 2015-08-11T15:07:44 |                      | Multiplets Integrals Sum 0.00 |                                                              | Number of Nuclei 0 H's |                      |
|-------------------------------------------------|----------------------|-------------------------------|--------------------------------------------------------------|------------------------|----------------------|
| Acquisition Time (sec)                          | 3.1719               | Comment                       | PROTON CDCl <sub>3</sub> (C:\Bruker\TOPSPIN1.3) fbriones 59  | Date                   | 11 Aug 2015 15:07:44 |
| Date Stamp                                      | 11 Aug 2015 15:07:44 | File Name                     | C:\Users\kmmk459\Desktop\OL-NMR\nicotinaldehyde\3\pdata1\11r | Origin                 | spect                |
| Frequency (MHz)                                 | 500.13               | Nucleus                       | 1H                                                           | Number of Transients   | 16                   |
| Original Points Count                           | 32768                | Owner                         | usbodlab                                                     | Points Count           | 32768                |
| Receiver Gain                                   | 57.00                | SW(cyclical) (Hz)             | 10330.58                                                     | Solvent                | CHLOROFORM-d         |
| Spectrum Offset (Hz)                            | 3088.5571            | Spectrum Type                 | STANDARD                                                     | Sweep Width (Hz)       | 10330.26             |
|                                                 |                      |                               |                                                              | Temperature (degree C) | 27.160               |

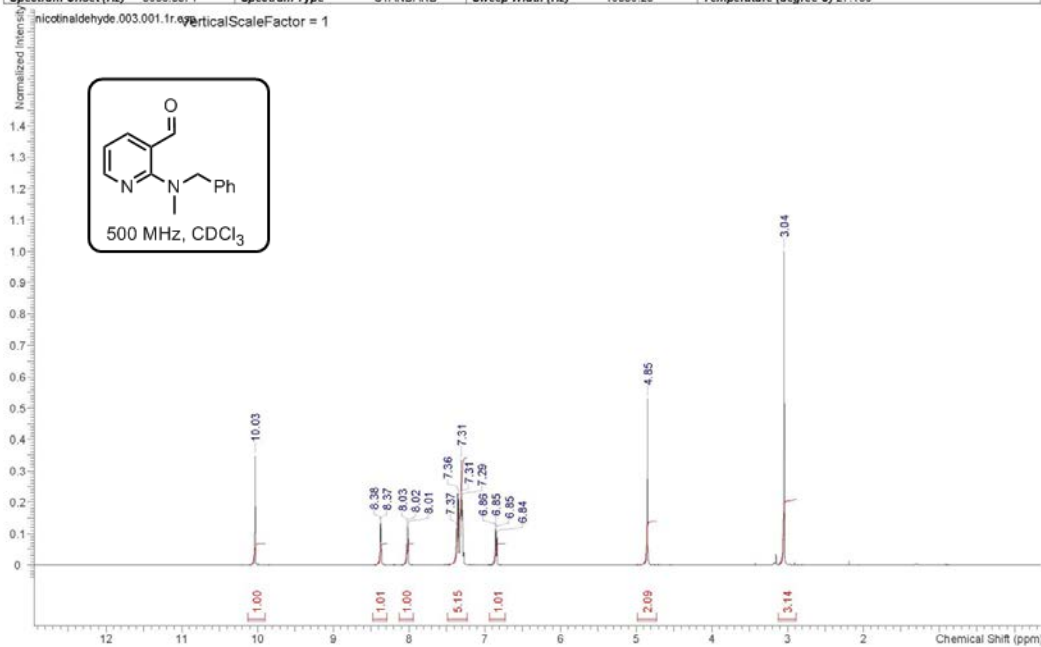

9/2/2015 3:42:32 PM

| OriginalDateForRelativeTime 2015-08-11T15:35:28 |                      | Multiplets Integrals Sum 0.00 |                                                              | Number of Nuclei 0 C's |                      |
|-------------------------------------------------|----------------------|-------------------------------|--------------------------------------------------------------|------------------------|----------------------|
| Acquisition Time (sec)                          | 1.0912               | Comment                       | C13CPD CDCl <sub>3</sub> (C:\Bruker\TOPSPIN1.3) fbriones 59  | Date                   | 11 Aug 2015 15:35:28 |
| Date Stamp                                      | 11 Aug 2015 15:35:28 | File Name                     | C:\Users\kmmk459\Desktop\OL-NMR\nicotinaldehyde\4\pdata1\11r | Origin                 | spect                |
| Frequency (MHz)                                 | 125.77               | Nucleus                       | 13C                                                          | Number of Transients   | 512                  |
| Original Points Count                           | 32768                | Owner                         | usbodlab                                                     | Points Count           | 32768                |
| Receiver Gain                                   | 5792.60              | SW(cyclical) (Hz)             | 30030.03                                                     | Solvent                | CHLOROFORM-d         |
| Spectrum Offset (Hz)                            | 12578.0596           | Spectrum Type                 | STANDARD                                                     | Sweep Width (Hz)       | 30029.11             |
|                                                 |                      |                               |                                                              | Temperature (degree C) | 27.160               |

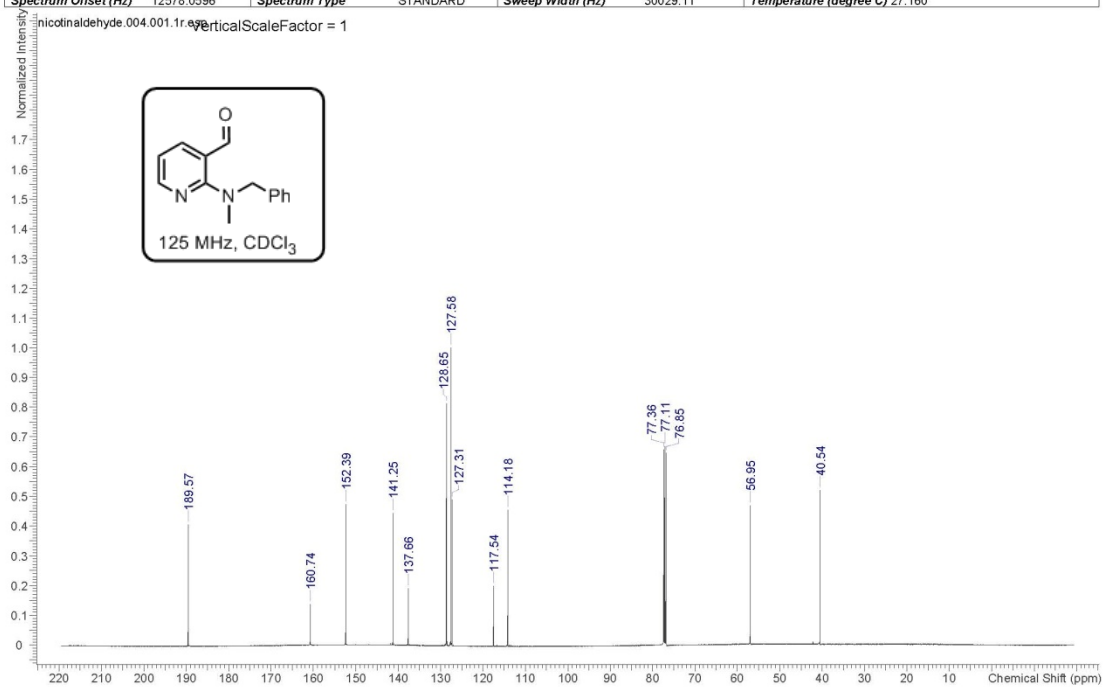

| OriginalDateForRelativeTime 2015-06-04T18:30:24 |                      | Multiplets Integrals Sum 0.00 |                                                  | Number of Nuclei 0 H's |                      |
|-------------------------------------------------|----------------------|-------------------------------|--------------------------------------------------|------------------------|----------------------|
| Acquisition Time (sec)                          | 2.6542               | Comment                       | A3 300MHz proton_QNP_32 CDCl3 (C:\u) fbriones 37 | Date                   | 04 Jun 2015 18:30:24 |
| Date Stamp                                      | 04 Jun 2015 18:30:24 | File Name                     | C:\Users\kwmk459\Desktop\OL-NMR\19\1\data\1\1r   | Origin                 | speed                |
| Frequency (MHz)                                 | 300.13               | Nucleus                       | 1H                                               | Number of Transients   | 32                   |
| Original Points Count                           | 16384                | Owner                         | usbodlab                                         | Points Count           | 32768                |
| Receiver Gain                                   | 574.70               | SW(cyclical) (Hz)             | 6172.84                                          | Solvent                | CHLOROFORM-d         |
| Spectrum Offset (Hz)                            | 1853.4569            | Spectrum Type                 | STANDARD                                         | Sweep Width (Hz)       | 6172.65              |
|                                                 |                      |                               |                                                  | Temperature (degree C) | 27.060               |

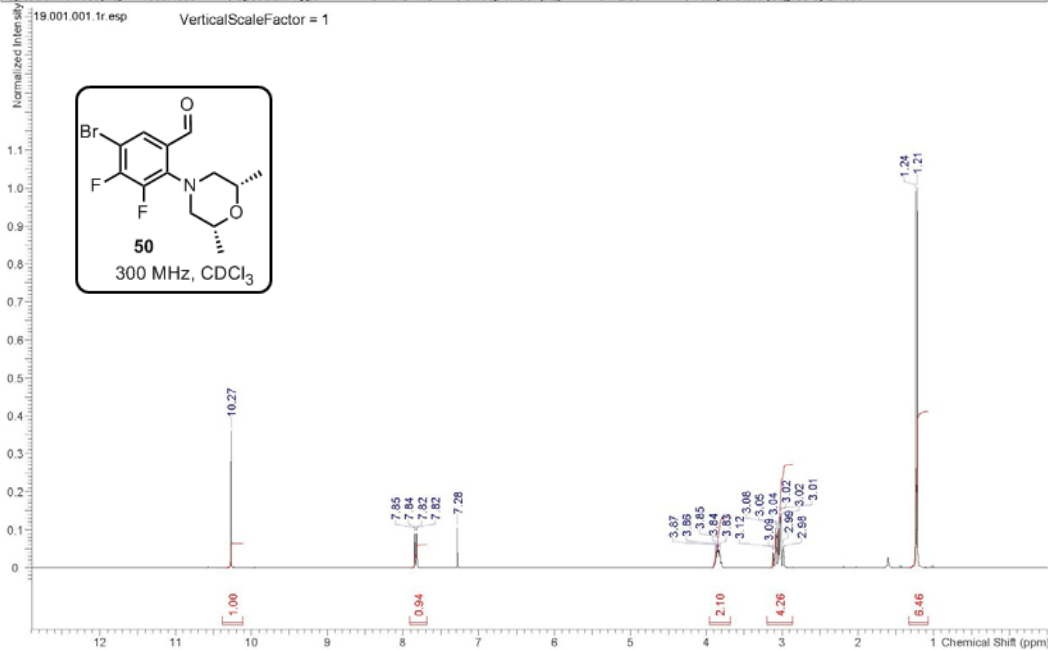

| OriginalDateForRelativeTime 2015-06-05T05:33:52 |                      | Number of Nuclei 0 C's |                                                    |
|-------------------------------------------------|----------------------|------------------------|----------------------------------------------------|
| Acquisition Time (sec)                          | 1.8612               | Comment                | A3 300MHz carbon_QNP_2500 CDCl3 (C:\u) fbriones 37 |
| Date Stamp                                      | 05 Jun 2015 05:33:52 | File Name              | C:\Users\kwmk459\Desktop\OL-NMR\19\2\data\1\1r     |
| Frequency (MHz)                                 | 75.48                | Nucleus                | 13C                                                |
| Original Points Count                           | 32768                | Owner                  | usbodlab                                           |
| Receiver Gain                                   | 3251.00              | SW(cyclical) (Hz)      | 17605.63                                           |
| Spectrum Offset (Hz)                            | 7547.9321            | Spectrum Type          | STANDARD                                           |
|                                                 |                      | Sweep Width (Hz)       | 17605.10                                           |
|                                                 |                      | Temperature (degree C) | 26.960                                             |

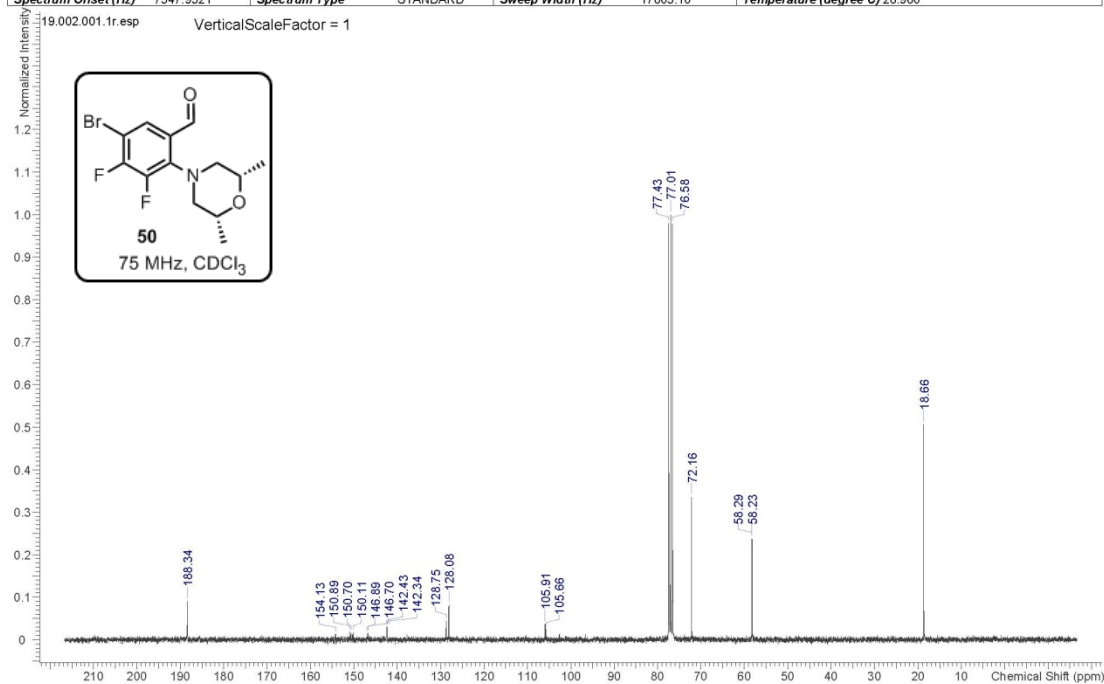

| OriginalDateForRelativeTime 2015-06-05T12:19:12 |                      | Multiplets Integrals Sum 0.00                                   | Number of Nuclei 0 F's        |
|-------------------------------------------------|----------------------|-----------------------------------------------------------------|-------------------------------|
| Acquisition Time (sec)                          | 0.8716               | Comment A3 300MHz fluorine_dec_QNP_64 CDCl3 (C:\u) fibriones 37 | Date 05 Jun 2015 12:19:12     |
| Date Stamp                                      | 05 Jun 2015 12:19:12 | File Name C:\Users\kmmw459\Desktop\OL-NMR\19\3\pdata\1\1r       |                               |
| Frequency (MHz)                                 | 282.38               | Nucleus 19F                                                     | Number of Transients 64       |
| Original Points Count                           | 65536                | Owner usbodlab                                                  | Points Count 65536            |
| Receiver Gain                                   | 1625.50              | SW(cyclical) (Hz) 75187.97                                      | Solvent CHLOROFORM-d          |
| Spectrum Offset (Hz)                            | -19769.5508          | Spectrum Type STANDARD                                          | Sweep Width (Hz) 75186.82     |
|                                                 |                      |                                                                 | Temperature (degree C) 26.960 |

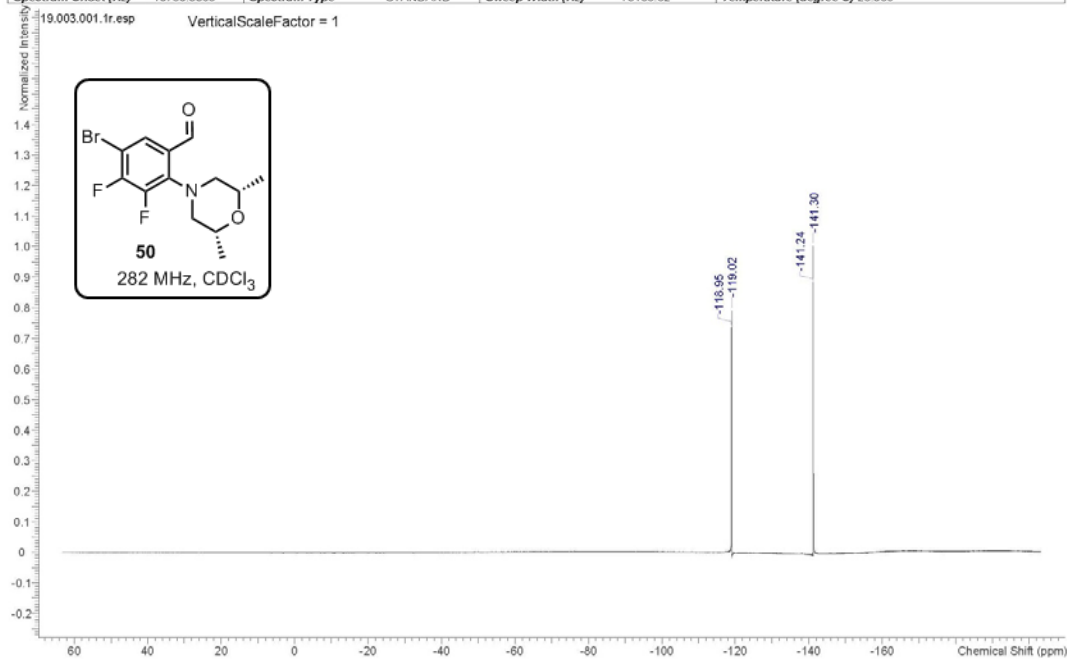

| OriginalDateForRelativeTime 2015-08-12T13:10:24 |                      | Multiplets Integrals Sum 0.00                            | Number of Nuclei 0 H's        |
|-------------------------------------------------|----------------------|----------------------------------------------------------|-------------------------------|
| Acquisition Time (sec)                          | 3.1719               | Comment PROTON CDCl3 (C:\Bruker\TOPSPIN1.3) fibriones 48 | Date 12 Aug 2015 13:10:24     |
| Date Stamp                                      | 12 Aug 2015 13:10:24 | File Name C:\Users\kmmw459\Desktop\OL-NMR\4-H\pdata\1\1r |                               |
| Frequency (MHz)                                 | 500.13               | Nucleus 1H                                               | Number of Transients 16       |
| Original Points Count                           | 32768                | Owner usbodlab                                           | Points Count 32768            |
| Receiver Gain                                   | 362.00               | SW(cyclical) (Hz) 10330.58                               | Solvent CHLOROFORM-d          |
| Spectrum Offset (Hz)                            | 3088.5571            | Spectrum Type STANDARD                                   | Sweep Width (Hz) 10330.26     |
|                                                 |                      |                                                          | Temperature (degree C) 27.160 |

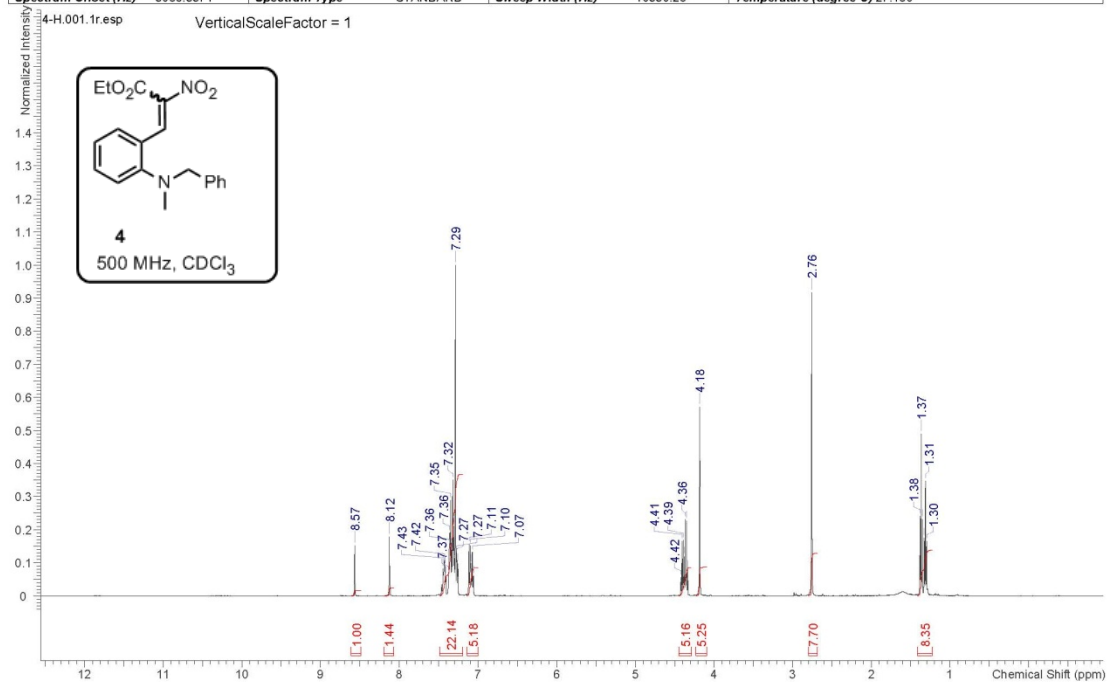

| OriginalDateForRelativeTime | 2015-08-12T12:53:20  | Multiplets Integrals Sum | 0.00                                            | Number of Nuclei       | 0 C's                |
|-----------------------------|----------------------|--------------------------|-------------------------------------------------|------------------------|----------------------|
| Acquisition Time (sec)      | 1.0912               | Comment                  | C13CPD CDCI3 (C:\Bruker\TOPSPIN1.3) fbriones 34 | Date                   | 12 Aug 2015 12:53:20 |
| Date Stamp                  | 12 Aug 2015 12:53:20 | File Name                | C:\Users\mwwk459\Desktop\OL-NMR4-C\data111r     | Original Points Count  | 32768                |
| Frequency (MHz)             | 125.77               | Nucleus                  | <sup>13</sup> C                                 | Number of Transients   | 512                  |
| Original Points Count       | 32768                | Owner                    | usbodlab                                        | Points Count           | 32768                |
| Receiver Gain               | 1149.40              | SW(cyclcal) (Hz)         | 30030.03                                        | Pulse Sequence         | zpgg30               |
| Spectrum Offset (Hz)        | 12578.0596           | Spectrum Type            | STANDARD                                        | Solvent                | CHLOROFORM-d         |
|                             |                      | Sweep Width (Hz)         | 30029.11                                        | Temperature (degree C) | 27.160               |

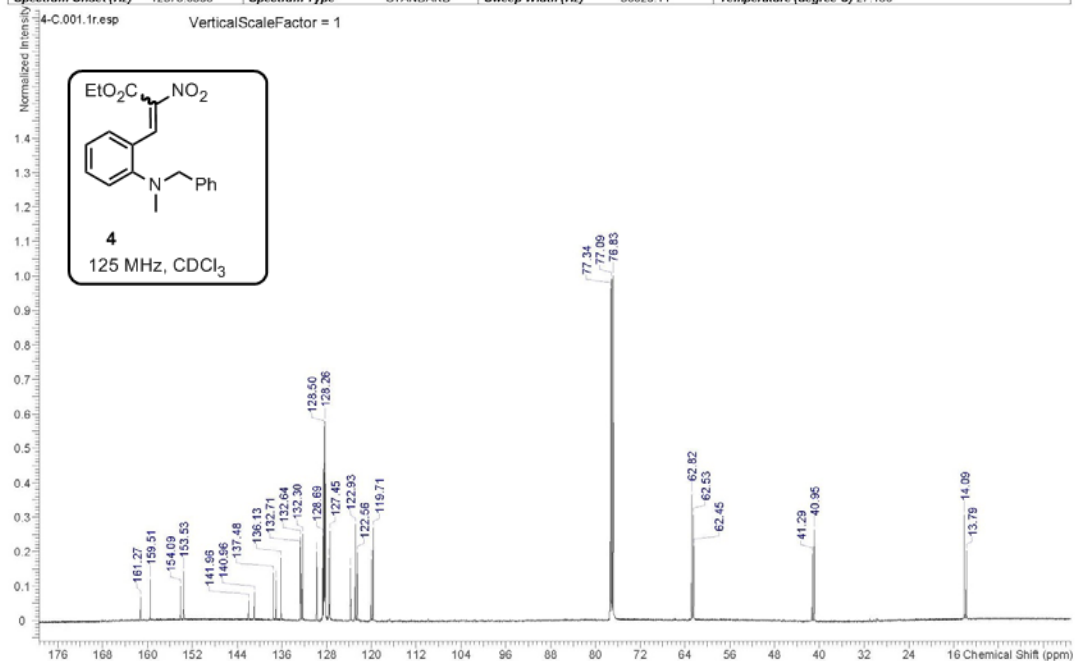

| OriginalDateForRelativeTime | 2014-03-30T13:38:08  | Multiplets Integrals Sum | 0.00                                                                         | Number of Nuclei      | 0 H's                |
|-----------------------------|----------------------|--------------------------|------------------------------------------------------------------------------|-----------------------|----------------------|
| Acquisition Time (sec)      | 0.9961               | Comment                  | proton_QNP_32 CDCI3 (C:\u) fbriones 14                                       | Date                  | 30 Mar 2014 13:38:08 |
| Date Stamp                  | 30 Mar 2014 13:38:08 | File Name                | \netapp2\nmr_archive\GHP_C3_400\data\briones\nmr\EN07310-73-POOLED1\data111r | Frequency (MHz)       | 400.13               |
| Nucleus                     | <sup>1</sup> H       | Number of Transients     | 32                                                                           | Original Points Count | 8192                 |
| Owner                       | usbodlab             | Points Count             | 32768                                                                        | Pulse Sequence        | zg30                 |
| SW(cyclcal) (Hz)            | 8223.68              | Solvent                  | CHLOROFORM-d                                                                 | Receiver Gain         | 181.00               |
| Spectrum Type               | STANDARD             | Sweep Width (Hz)         | 8223.43                                                                      | Spectrum Offset (Hz)  | 2471.0068            |
|                             |                      | Temperature (degree C)   | 26.960                                                                       |                       |                      |

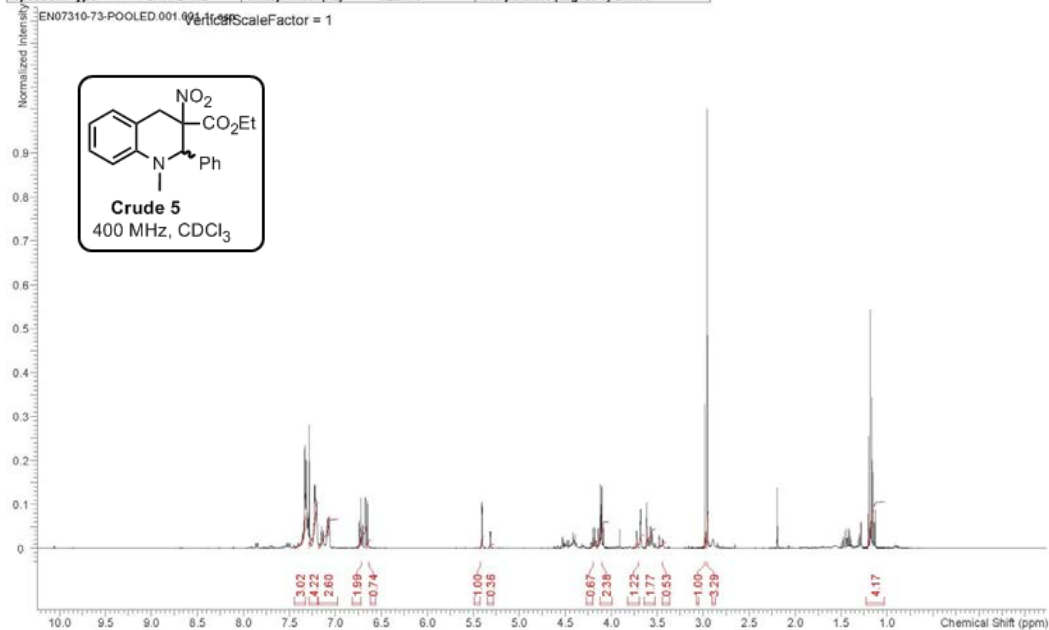



| OriginalDateForRelativeTime 2014-11-19T16:07:12 |                      | Multiplets Integrals Sum 0.00 |                                                             | Number of Nuclei 0 H's |                      |
|-------------------------------------------------|----------------------|-------------------------------|-------------------------------------------------------------|------------------------|----------------------|
| Acquisition Time (sec)                          | 0.9961               | Comment                       | proton_QNP_32 CDC13 [C:\u] fibriones 44                     | Date                   | 19 Nov 2014 16:07:12 |
| Date Stamp                                      | 19 Nov 2014 16:07:12 | File Name                     | C:\Users\kww459\Desktop\OL-NMR\crude-entry2-11\1\data1\1\1r | Origin                 | spect                |
| Frequency (MHz)                                 | 400.13               | Nucleus                       | 1H                                                          | Number of Transients   | 32                   |
| Original Points Count                           | 8192                 | Owner                         | usbodlab                                                    | Points Count           | 32768                |
| Receiver Gain                                   | 161.30               | SW(cyclical) (Hz)             | 8223.68                                                     | Solvent                | CHLOROFORM-d         |
| Spectrum Offset (Hz)                            | 2471.0088            | Spectrum Type                 | STANDARD                                                    | Sweep Width (Hz)       | 8223.43              |
|                                                 |                      |                               |                                                             | Temperature (degree C) | 26.960               |

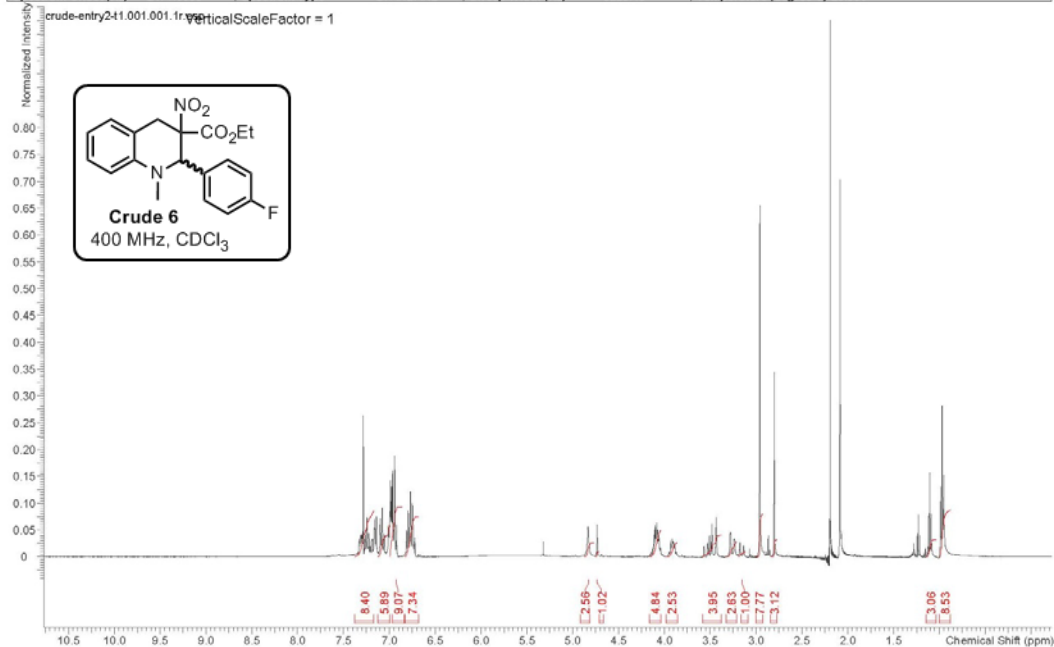

| OriginalDateForRelativeTime 2014-10-20T09:54:08 |                      | Multiplets Integrals Sum 0.00 |                                                             | Number of Nuclei 0 H's |                      |
|-------------------------------------------------|----------------------|-------------------------------|-------------------------------------------------------------|------------------------|----------------------|
| Acquisition Time (sec)                          | 0.9961               | Comment                       | proton_QNP_32 CDC13 [C:\u] fibriones 11                     | Date                   | 20 Oct 2014 09:54:08 |
| Date Stamp                                      | 20 Oct 2014 09:54:08 | File Name                     | C:\Users\kww459\Desktop\OL-NMR\crude-entry3-11\1\data1\1\1r | Origin                 | spect                |
| Frequency (MHz)                                 | 400.13               | Nucleus                       | 1H                                                          | Number of Transients   | 32                   |
| Original Points Count                           | 8192                 | Owner                         | usbodlab                                                    | Points Count           | 32768                |
| Receiver Gain                                   | 181.00               | SW(cyclical) (Hz)             | 8223.68                                                     | Solvent                | CHLOROFORM-d         |
| Spectrum Offset (Hz)                            | 2471.0088            | Spectrum Type                 | STANDARD                                                    | Sweep Width (Hz)       | 8223.43              |
|                                                 |                      |                               |                                                             | Temperature (degree C) | 26.960               |

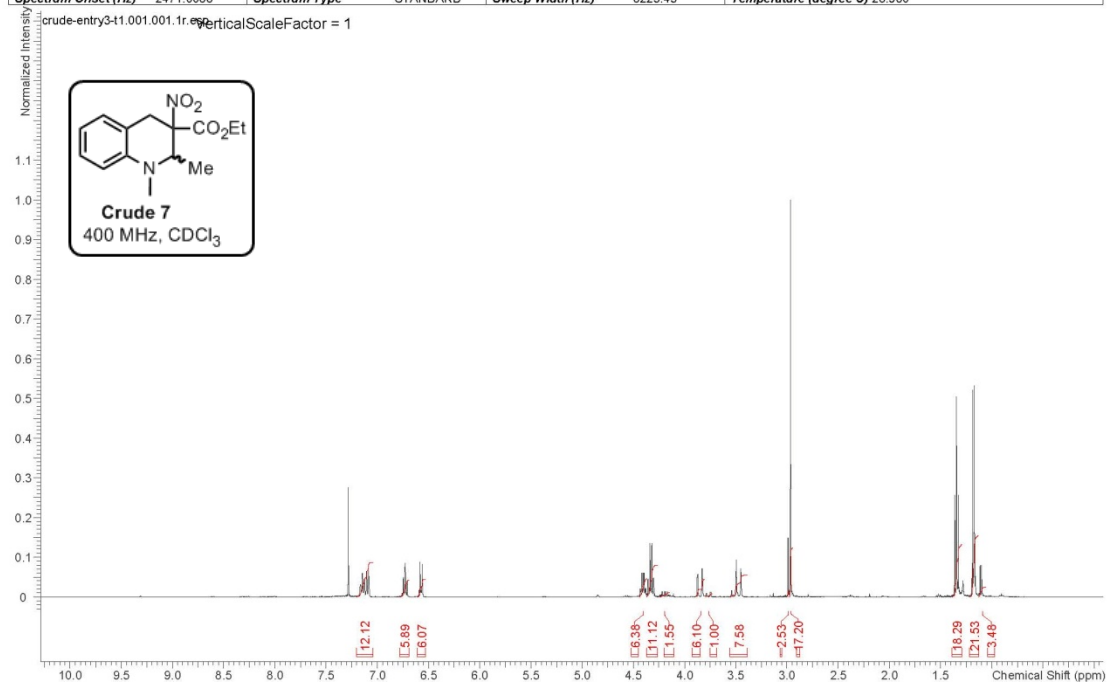

| OriginalDateForRelativeTime 2014-11-05T16:32:48 |                      | Multiplets Integrals Sum 0.00 |                                                             | Number of Nuclei 0 H's |                      |
|-------------------------------------------------|----------------------|-------------------------------|-------------------------------------------------------------|------------------------|----------------------|
| Acquisition Time (sec)                          | 0.9961               | Comment                       | proton_longdelay_ONP_16 CDCl3 (C-13) fbriones 3             | Date                   | 05 Nov 2014 16:32:48 |
| Date Stamp                                      | 05 Nov 2014 16:32:48 | File Name                     | C:\Users\kmmk459\Desktop\OL-NMR\crude-entry4-11\1\data\111r | Origin                 | spect                |
| Frequency (MHz)                                 | 400.13               | Nucleus                       | 1H                                                          | Number of Transients   | 16                   |
| Original Points Count                           | 8192                 | Owner                         | usbodlab                                                    | Points Count           | 32768                |
| Receiver Gain                                   | 181.00               | SW(cyclical) (Hz)             | 8223.68                                                     | Solvent                | CHLOROFORM-d         |
| Spectrum Offset (Hz)                            | 2432.7966            | Spectrum Type                 | STANDARD                                                    | Sweep Width (Hz)       | 8223.43              |
|                                                 |                      |                               |                                                             | Temperature (degree C) | 26.960               |

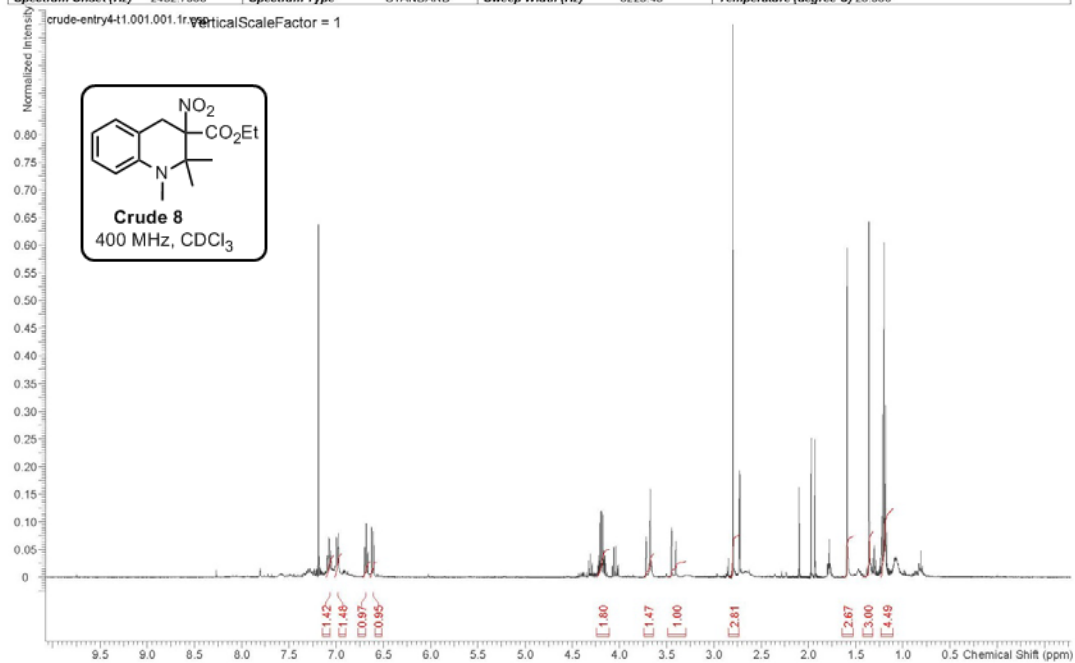

| OriginalDateForRelativeTime 2014-12-05T15:45:52 |                      | Multiplets Integrals Sum 0.00 |                                                             | Number of Nuclei 0 H's |                      |
|-------------------------------------------------|----------------------|-------------------------------|-------------------------------------------------------------|------------------------|----------------------|
| Acquisition Time (sec)                          | 0.9961               | Comment                       | proton_ONP_32 CDCl3 (C-13) fbriones 21                      | Date                   | 05 Dec 2014 15:45:52 |
| Date Stamp                                      | 05 Dec 2014 15:45:52 | File Name                     | C:\Users\kmmk459\Desktop\OL-NMR\crude-entry5-11\1\data\111r | Origin                 | spect                |
| Frequency (MHz)                                 | 400.13               | Nucleus                       | 1H                                                          | Number of Transients   | 32                   |
| Original Points Count                           | 8192                 | Owner                         | usbodlab                                                    | Points Count           | 32768                |
| Receiver Gain                                   | 181.00               | SW(cyclical) (Hz)             | 8223.68                                                     | Solvent                | CHLOROFORM-d         |
| Spectrum Offset (Hz)                            | 2471.0088            | Spectrum Type                 | STANDARD                                                    | Sweep Width (Hz)       | 8223.43              |
|                                                 |                      |                               |                                                             | Temperature (degree C) | 27.060               |

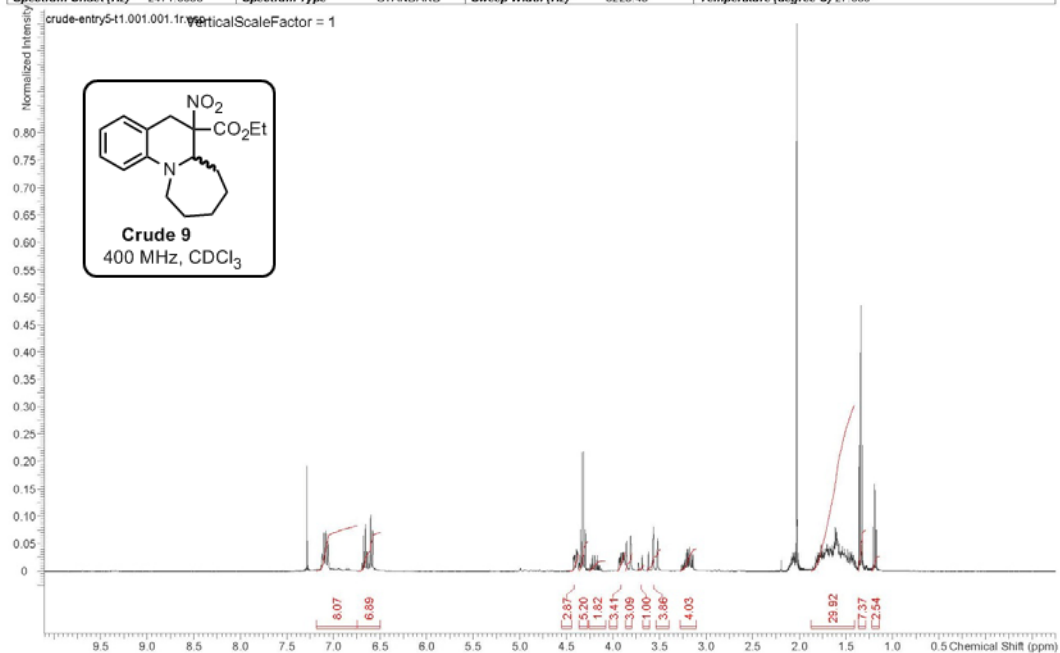

| OriginalDateForRelativeTime 2015-01-13T10:49:20 |                      | Multiplets Integrals Sum 0.00 |                                                             | Number of Nuclei 0 H's         |              |                        |        |
|-------------------------------------------------|----------------------|-------------------------------|-------------------------------------------------------------|--------------------------------|--------------|------------------------|--------|
| Acquisition Time (sec)                          | 0.9961               | Comment                       | proton_longdelay                                            | QNP_16 CDCl3 (C'u) fbriones 49 | Date         | 13 Jan 2015 10:49:20   |        |
| Date Stamp                                      | 13 Jan 2015 10:49:20 | File Name                     | C:\Users\kwmw459\Desktop\OL-NMR\crude-entry6-1111\data\111r |                                |              |                        |        |
| Frequency (MHz)                                 | 400.13               | Nucleus                       | 1H                                                          | Number of Transients           | 16           | Origin                 | spect  |
| Original Points Count                           | 8192                 | Owner                         | usbodlab                                                    | Points Count                   | 32768        | Pulse Sequence         | zg30   |
| Receiver Gain                                   | 228.10               | SW(cyclical) (Hz)             | 8223.68                                                     | Solvent                        | CHLOROFORM-d |                        |        |
| Spectrum Offset (Hz)                            | 2471.0088            | Spectrum Type                 | STANDARD                                                    | Sweep Width (Hz)               | 8223.43      | Temperature (degree C) | 26.960 |

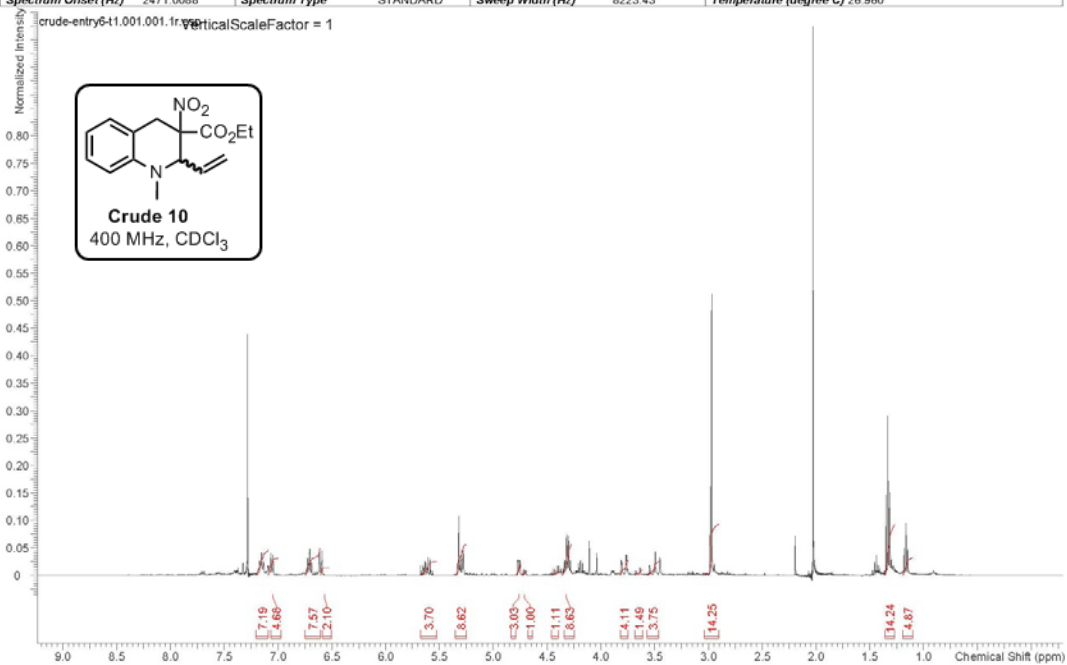

| OriginalDateForRelativeTime 2015-03-06T17:02:40 |                      | Multiplets Integrals Sum 0.00 |                                                           | Number of Nuclei 0 H's         |              |                        |        |
|-------------------------------------------------|----------------------|-------------------------------|-----------------------------------------------------------|--------------------------------|--------------|------------------------|--------|
| Acquisition Time (sec)                          | 0.9961               | Comment                       | proton_longdelay                                          | QNP_16 CDCl3 (C'u) fbriones 43 | Date         | 06 Mar 2015 17:02:40   |        |
| Date Stamp                                      | 06 Mar 2015 17:02:40 | File Name                     | C:\Users\kwmw459\Desktop\OL-NMR\EN07754-6-PURE\1\data\11r |                                |              |                        |        |
| Frequency (MHz)                                 | 400.13               | Nucleus                       | 1H                                                        | Number of Transients           | 16           | Origin                 | spect  |
| Original Points Count                           | 8192                 | Owner                         | usbodlab                                                  | Points Count                   | 32768        | Pulse Sequence         | zg30   |
| Receiver Gain                                   | 128.00               | SW(cyclical) (Hz)             | 8223.68                                                   | Solvent                        | CHLOROFORM-d |                        |        |
| Spectrum Offset (Hz)                            | 2435.9014            | Spectrum Type                 | STANDARD                                                  | Sweep Width (Hz)               | 8223.43      | Temperature (degree C) | 26.960 |

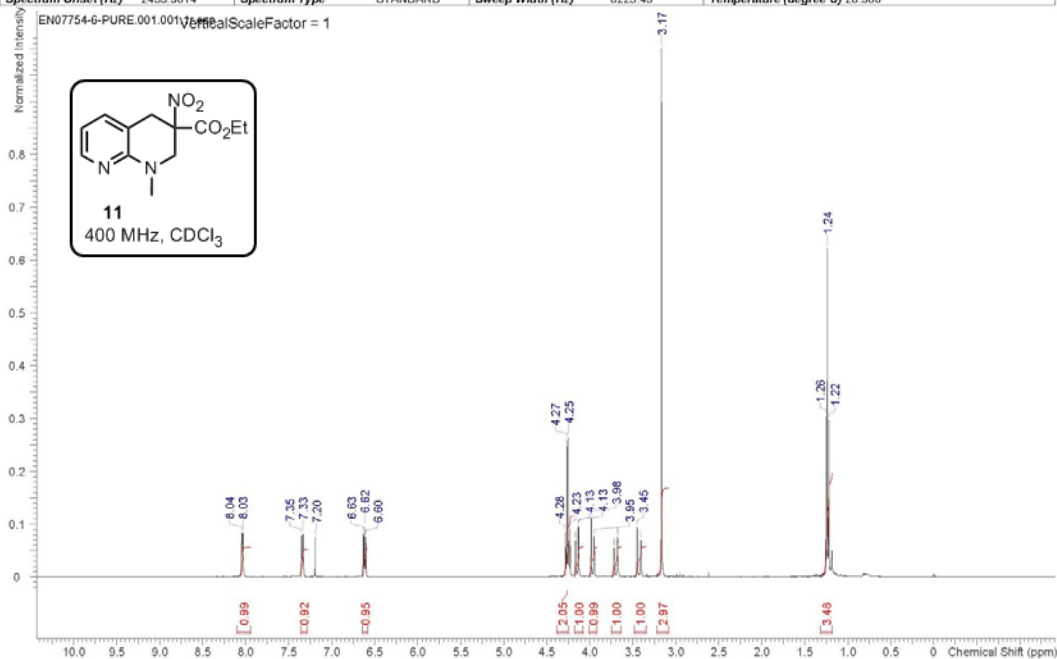

| OriginalDateForRelativeTime 2015-03-06T21:48:32 |                      | Number of Nuclei  |                                                            | 0 C's                  |                      |
|-------------------------------------------------|----------------------|-------------------|------------------------------------------------------------|------------------------|----------------------|
| Acquisition Time (sec)                          | 1.3664               | Comment           | carbon_QNP_2500 CDCl3 (C'u) fbriones 43                    | Date                   | 06 Mar 2015 21:48:32 |
| Date Stamp                                      | 06 Mar 2015 21:48:32 | File Name         | C:\Users\kwmk459\Desktop\OL-NMR\EN07754-6-PURE\2\data\1\1r | Origin                 | spect                |
| Frequency (MHz)                                 | 100.62               | Nucleus           | 13C                                                        | Number of Transients   | 2500                 |
| Original Points Count                           | 32768                | Owner             | usbodlab                                                   | Points Count           | 32768                |
| Receiver Gain                                   | 16384.00             | SW(cyclical) (Hz) | 23980.81                                                   | Solvent                | CHLOROFORM-d         |
| Spectrum Offset (Hz)                            | 10062.3730           | Spectrum Type     | STANDARD                                                   | Sweep Width (Hz)       | 23980.08             |
|                                                 |                      |                   |                                                            | Temperature (degree C) | 28.260               |

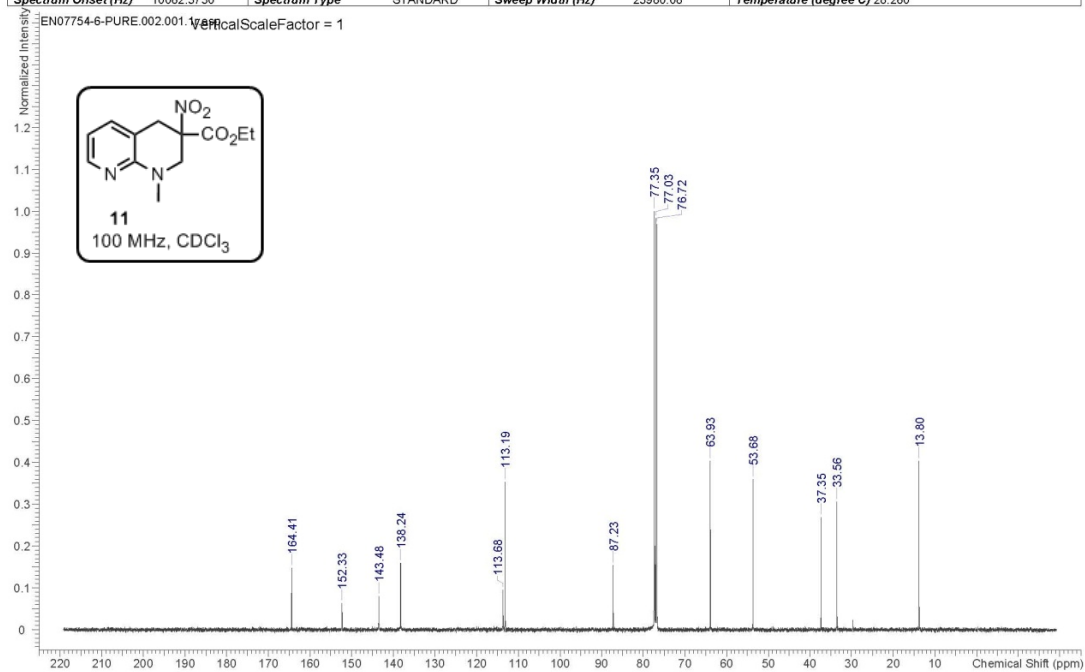

| OriginalDateForRelativeTime 2015-03-08T16:05:20 |                      | Number of Nuclei  |                                                            | 0 C's                  |                      |
|-------------------------------------------------|----------------------|-------------------|------------------------------------------------------------|------------------------|----------------------|
| Acquisition Time (sec)                          | 1.3664               | Comment           | dept_QNP_2000 CDCl3 (C'u) fbriones 43                      | Date                   | 08 Mar 2015 16:05:20 |
| Date Stamp                                      | 08 Mar 2015 16:05:20 | File Name         | C:\Users\kwmk459\Desktop\OL-NMR\EN07754-6-PURE\3\data\1\1r | Origin                 | spect                |
| Frequency (MHz)                                 | 100.62               | Nucleus           | 13C                                                        | Number of Transients   | 2000                 |
| Original Points Count                           | 32768                | Owner             | usbodlab                                                   | Points Count           | 32768                |
| Receiver Gain                                   | 16384.00             | SW(cyclical) (Hz) | 23980.81                                                   | Solvent                | CHLOROFORM-d         |
| Spectrum Offset (Hz)                            | 10062.3730           | Spectrum Type     | DEPT135                                                    | Sweep Width (Hz)       | 23980.08             |
|                                                 |                      |                   |                                                            | Temperature (degree C) | 26.960               |

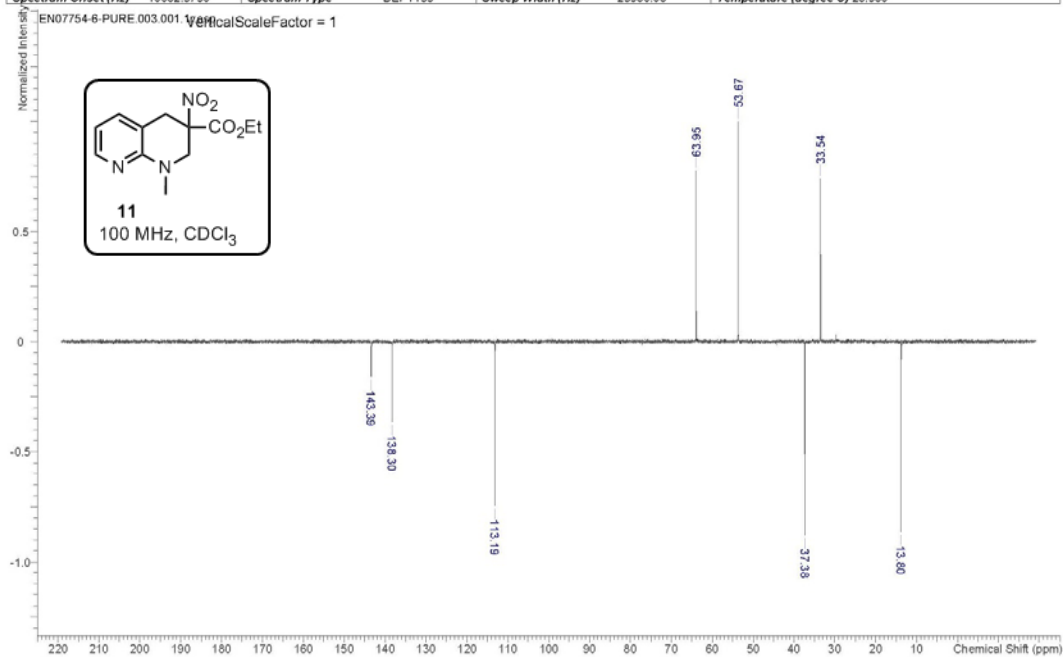

| OriginalDateForRelativeTime 2015-08-19T16:01:04 |                      | Multiplets Integrals Sum 0.00 |                                                               | Number of Nuclei 0 H's                    |                           |
|-------------------------------------------------|----------------------|-------------------------------|---------------------------------------------------------------|-------------------------------------------|---------------------------|
| Acquisition Time (sec)                          | 2.6542               | Comment                       | A3 300MHz proton                                              | jongdelay_QNP_16 CDCl3 (C:\u) fbriones 4T | Date 19 Aug 2015 16:01:04 |
| Date Stamp                                      | 19 Aug 2015 16:01:04 | File Name                     | C:\Users\krmwk459\Desktop\OL-NMR\crude-entry8-11\1\pdata\1\1r |                                           |                           |
| Frequency (MHz)                                 | 300.13               | Nucleus                       | 1H                                                            | Number of Transients                      | 16                        |
| Original Points Count                           | 18384                | Owner                         | usbodlab                                                      | Points Count                              | 32768                     |
| Receiver Gain                                   | 456.10               | SW(cyclical) (Hz)             | 6172.84                                                       | Solvent                                   | CHLOROFORM-d              |
| Spectrum Offset (Hz)                            | 1853.4569            | Spectrum Type                 | STANDARD                                                      | Sweep Width (Hz)                          | 6172.65                   |
|                                                 |                      |                               |                                                               | Temperature (degree C)                    | 27.060                    |

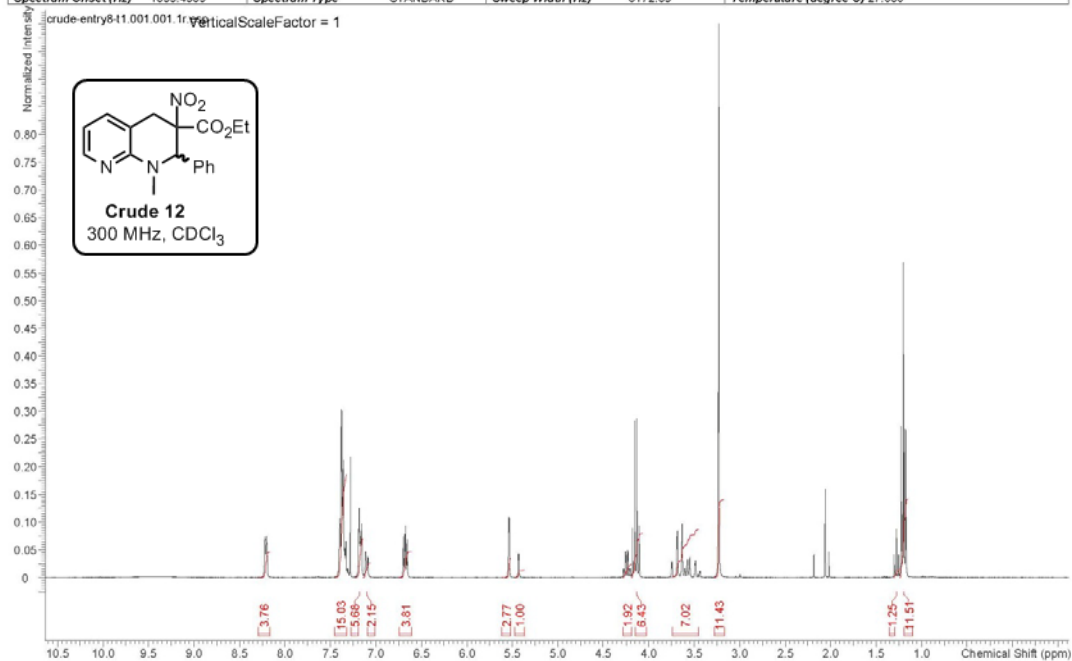

| OriginalDateForRelativeTime 2014-04-03T13:33:52 |                      | Multiplets Integrals Sum 0.00 |                                                         | Number of Nuclei 0 H's |                      |
|-------------------------------------------------|----------------------|-------------------------------|---------------------------------------------------------|------------------------|----------------------|
| Acquisition Time (sec)                          | 0.9961               | Comment                       | proton_QNP_32 CDCl3 (C:\u) fbriones 3                   | Date                   | 03 Apr 2014 13:33:52 |
| Date Stamp                                      | 03 Apr 2014 13:33:52 | File Name                     | C:\Users\krmwk459\Desktop\OL-NMR\5a-H-pure\1\pdata\1\1r |                        |                      |
| Frequency (MHz)                                 | 400.13               | Nucleus                       | 1H                                                      | Number of Transients   | 32                   |
| Original Points Count                           | 8192                 | Owner                         | usbodlab                                                | Points Count           | 32768                |
| Receiver Gain                                   | 161.30               | SW(cyclical) (Hz)             | 8223.68                                                 | Solvent                | CHLOROFORM-d         |
| Spectrum Offset (Hz)                            | 2471.0088            | Spectrum Type                 | STANDARD                                                | Sweep Width (Hz)       | 8223.43              |
|                                                 |                      |                               |                                                         | Temperature (degree C) | 27.060               |

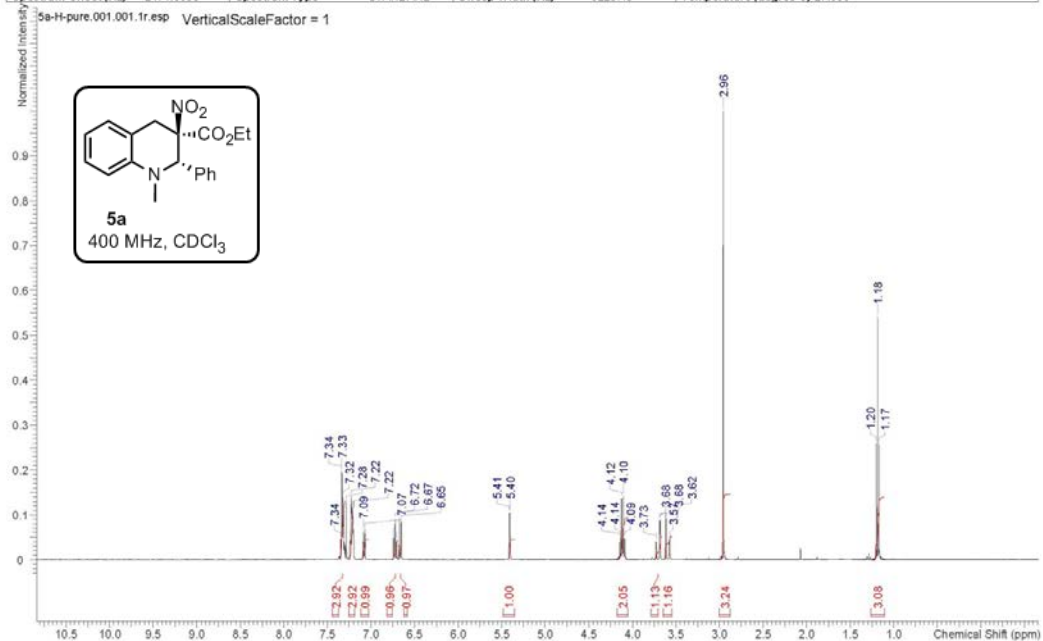

9/2/2015 4:52:08 PM

| OriginalDateForRelativeTime 2015-08-19T01:17:52 |                      | Multiplets Integrals Sum 0.00 |                                                      | Number of Nuclei 0 C's |                      |
|-------------------------------------------------|----------------------|-------------------------------|------------------------------------------------------|------------------------|----------------------|
| Acquisition Time (sec)                          | 1.0912               | Comment                       | C13CPD-long CDCl3 (C:\Bruker\TOPSPIN1.3}\fbriones 53 | Date                   | 19 Aug 2015 01:17:52 |
| Date Stamp                                      | 19 Aug 2015 01:17:52 | File Name                     | C:\Users\kmmw459\Desktop\OL-NMR\5a-C\data111r        |                        |                      |
| Frequency (MHz)                                 | 125.77               | Nucleus                       | 13C                                                  | Number of Transients   | 8192                 |
| Original Points Count                           | 32768                | Owner                         | usbodlab                                             | Points Count           | 32768                |
| Receiver Gain                                   | 4096.00              | SW(cyclical) (Hz)             | 30030.03                                             | Solvent                | CHLOROFORM-d         |
| Spectrum Offset (Hz)                            | 12578.0596           | Spectrum Type                 | STANDARD                                             | Sweep Width (Hz)       | 30029.11             |
|                                                 |                      |                               |                                                      | Temperature (degree C) | 27.160               |

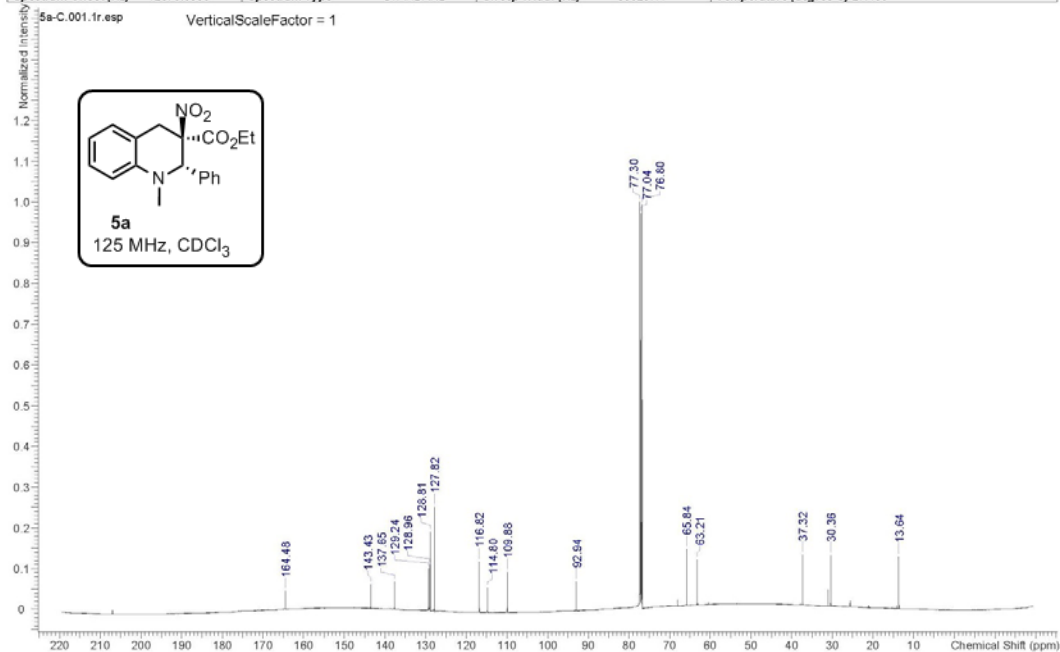

9/2/2015 4:56:34 PM

| OriginalDateForRelativeTime 2015-08-24T16:48:00 |                      | Multiplets Integrals Sum 0.00 |                                                | Number of Nuclei 0 H's |                      |
|-------------------------------------------------|----------------------|-------------------------------|------------------------------------------------|------------------------|----------------------|
| Acquisition Time (sec)                          | 3.1719               | Comment                       | PROTON CDCl3 (C:\Bruker\TOPSPIN1.3}\fbriones 4 | Date                   | 24 Aug 2015 16:48:00 |
| Date Stamp                                      | 24 Aug 2015 16:48:00 | File Name                     | C:\Users\kmmw459\Desktop\OL-NMR\13-H\data111r  |                        |                      |
| Frequency (MHz)                                 | 500.13               | Nucleus                       | 1H                                             | Number of Transients   | 64                   |
| Original Points Count                           | 32768                | Owner                         | usbodlab                                       | Points Count           | 32768                |
| Receiver Gain                                   | 80.60                | SW(cyclical) (Hz)             | 10330.58                                       | Solvent                | CHLOROFORM-d         |
| Spectrum Offset (Hz)                            | 3088.5571            | Spectrum Type                 | STANDARD                                       | Sweep Width (Hz)       | 10330.26             |
|                                                 |                      |                               |                                                | Temperature (degree C) | 27.160               |

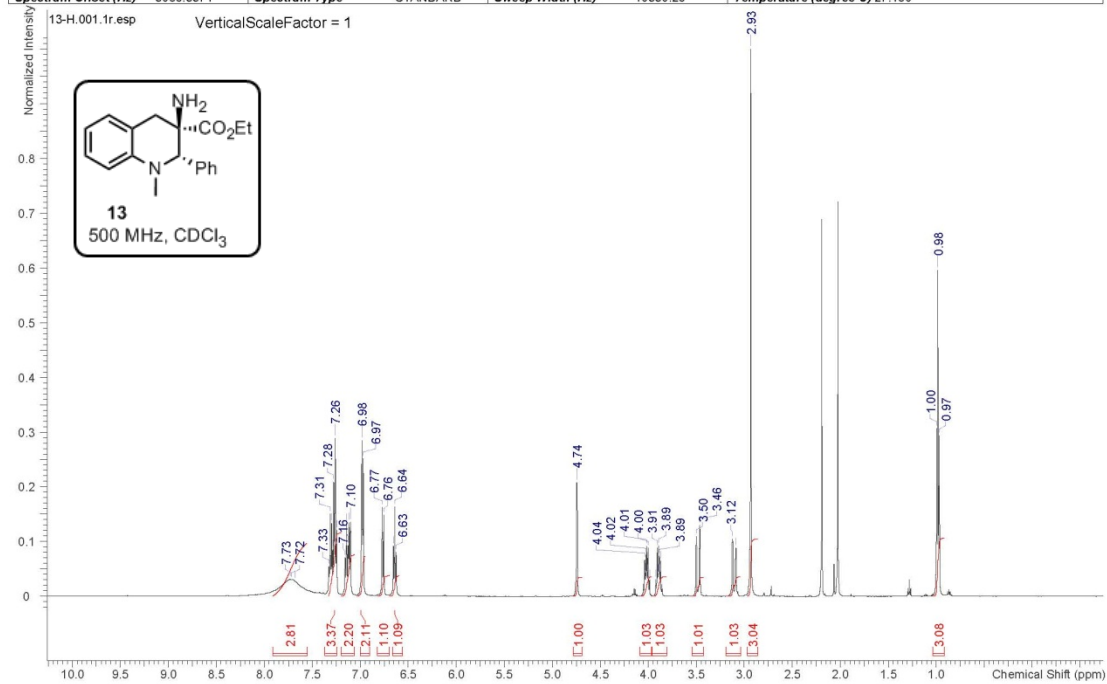

| OriginalDateForRelativeTime 2015-08-25T01:17:52 |                      | Multiplets Integrals Sum 0.00 |                                                     | Number of Nuclei 0 C's |                      |
|-------------------------------------------------|----------------------|-------------------------------|-----------------------------------------------------|------------------------|----------------------|
| Acquisition Time (sec)                          | 1.0912               | Comment                       | C13CPD-long CDCl3 [C:\Bruker\TOPSPIN1.3] fbriones 4 | Date                   | 25 Aug 2015 01:17:52 |
| Date Stamp                                      | 25 Aug 2015 01:17:52 | File Name                     | C:\Users\kwmk459\Desktop\OL-NMR\13-C\data\111r      | Origin                 | spect                |
| Frequency (MHz)                                 | 125.77               | Nucleus                       | 13C                                                 | Number of Transients   | 8192                 |
| Original Points Count                           | 32768                | Owner                         | usbodlab                                            | Points Count           | 32768                |
| Receiver Gain                                   | 3251.00              | SW(cyclical) (Hz)             | 30030.03                                            | Solvent                | CHLOROFORM-d         |
| Spectrum Offset (Hz)                            | 12342.5166           | Spectrum Type                 | STANDARD                                            | Sweep Width (Hz)       | 30029.11             |
|                                                 |                      |                               |                                                     | Temperature (degree C) | 27.160               |

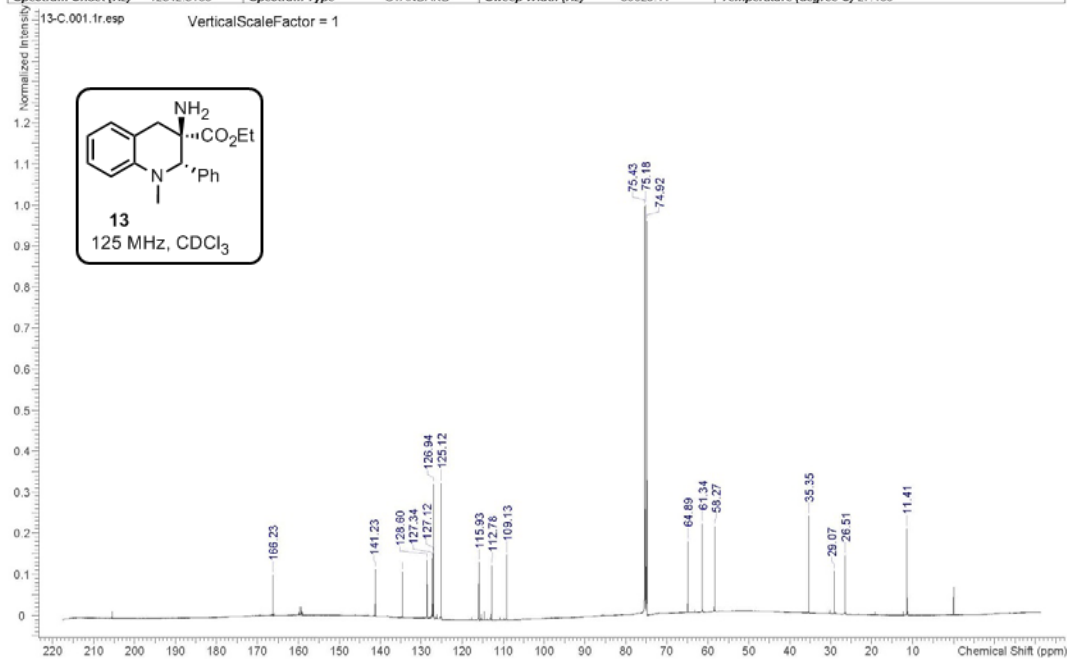

| OriginalDateForRelativeTime 2014-04-28T14:59:12 |                      | Multiplets Integrals Sum 18.55 |                                                  | Number of Nuclei 17 H's |                      |
|-------------------------------------------------|----------------------|--------------------------------|--------------------------------------------------|-------------------------|----------------------|
| Acquisition Time (sec)                          | 0.9961               | Comment                        | proton_QNP_128 DMSO [C:\u] fbriones 3            | Date                    | 28 Apr 2014 14:59:12 |
| Date Stamp                                      | 28 Apr 2014 14:59:12 | File Name                      | C:\Users\kwmk459\Desktop\OL-NMR\15-H\1\data\111r | Origin                  | spect                |
| Frequency (MHz)                                 | 400.13               | Nucleus                        | 1H                                               | Number of Transients    | 128                  |
| Original Points Count                           | 8192                 | Owner                          | usbodlab                                         | Points Count            | 32768                |
| Receiver Gain                                   | 128.00               | SW(cyclical) (Hz)              | 8223.68                                          | Solvent                 | DMSO-d6              |
| Spectrum Type                                   | STANDARD             | Sweep Width (Hz)               | 8223.43                                          | Temperature (degree C)  | 27.060               |
|                                                 |                      |                                |                                                  | Spectrum Offset (Hz)    | 2471.0088            |

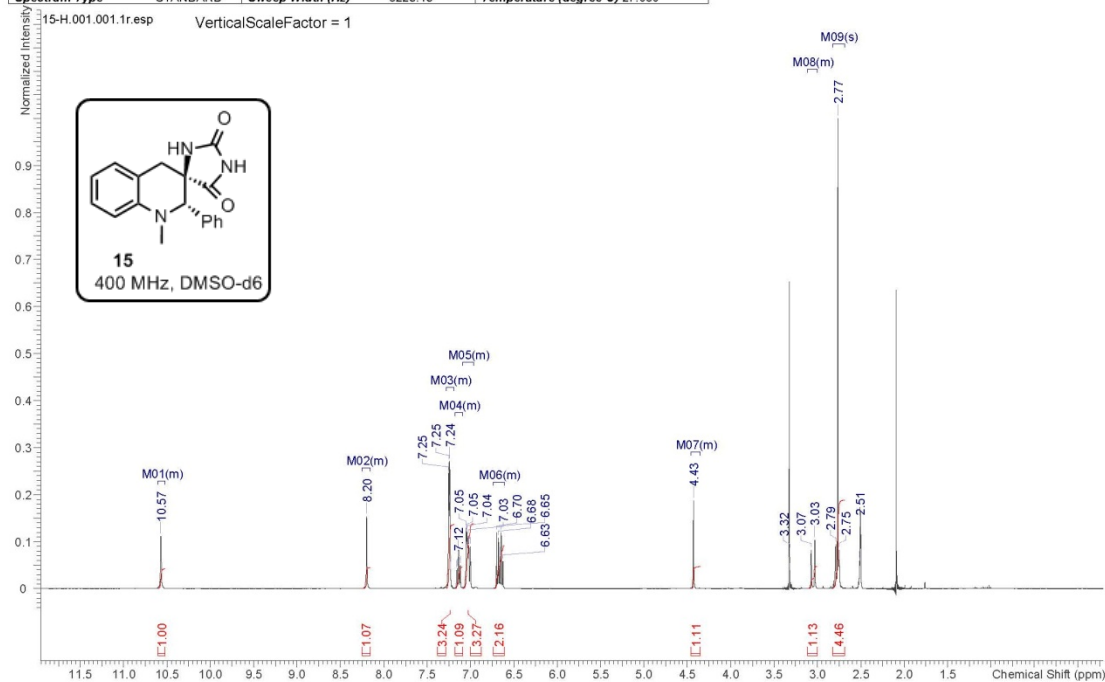

| OriginalDateForRelativeTime | 2014-07-12T07:01:20                                                             | Number of Nuclei       | 0 C's                                   |                      |           |
|-----------------------------|---------------------------------------------------------------------------------|------------------------|-----------------------------------------|----------------------|-----------|
| Acquisition Time (sec)      | 1.3664                                                                          | Comment                | carbon_QNP_8000 DMSO (C:u) fibriones 41 |                      |           |
| Date Stamp                  | 12 Jul 2014 07:01:20                                                            |                        | Date                                    | 12 Jul 2014 07:01:20 |           |
| File Name                   | V:\etapp2\nmr_archive\GHP_C3_400\data\fbriones\nmr\EN07375-98A-SPIRO2\data\111r |                        | Frequency (MHz)                         | 100.62               |           |
| Nucleus                     | 13C                                                                             | Number of Transients   | 8000                                    | Origin               | spect     |
| Owner                       | usbodlab                                                                        | Points Count           | 32768                                   | Pulse Sequence       | zgpg30    |
| SW(cyclical) (Hz)           | 23980.81                                                                        | Solvent                | DMSO-d6                                 | Receiver Gain        | 7298.20   |
| Sweep Width (Hz)            | 23980.08                                                                        | Temperature (degree C) | 29.660                                  | Spectrum Offset (Hz) | 9902.5947 |
|                             |                                                                                 |                        |                                         | Spectrum Type        | STANDARD  |

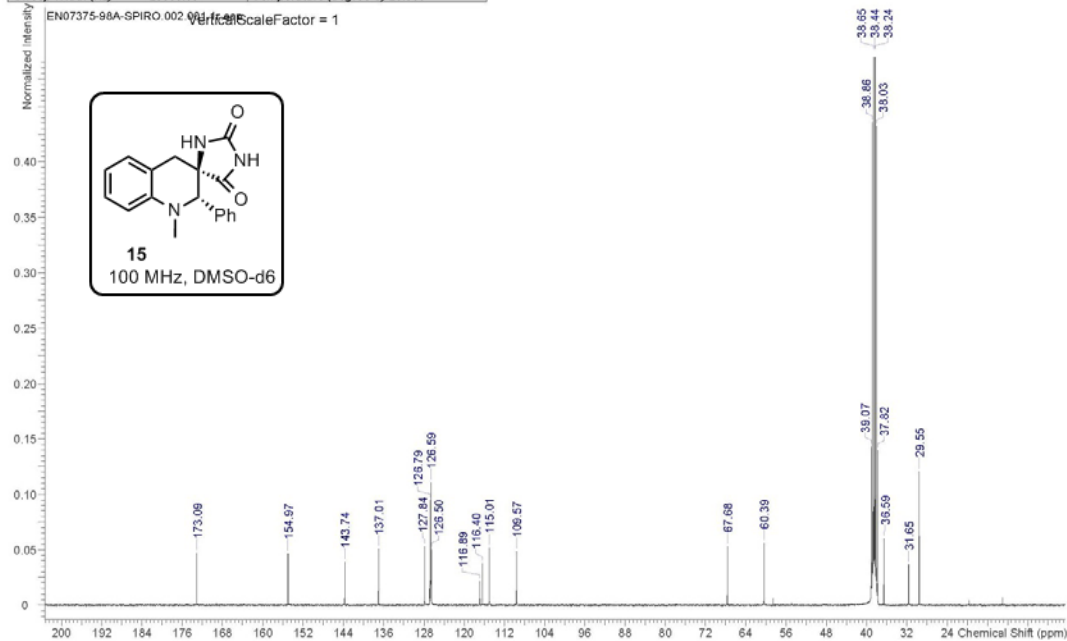

| OriginalDateForRelativeTime | 2014-04-28T14:35:44  | Multiplets Integrals Sum | 0.00                                                                   | Number of Nuclei       | 0 H's                |
|-----------------------------|----------------------|--------------------------|------------------------------------------------------------------------|------------------------|----------------------|
| Acquisition Time (sec)      | 0.9961               | Comment                  | proton_longdelay_QNP_16 Acetic (C:u) fibriones 30                      | Date                   | 28 Apr 2014 14:35:44 |
| Date Stamp                  | 28 Apr 2014 14:35:44 | File Name                | C:\Users\kwwk459\Desktop\OL-NMR\Table 3\amines\17b-amine-H12\data\111r |                        |                      |
| Frequency (MHz)             | 400.13               | Nucleus                  | 1H                                                                     | Number of Transients   | 16                   |
| Original Points Count       | 8192                 | Owner                    | usbodlab                                                               | Points Count           | 32768                |
| Receiver Gain               | 32.00                | SW(cyclical) (Hz)        | 8223.68                                                                | Solvent                | Acetic               |
| Spectrum Type               | STANDARD             | Sweep Width (Hz)         | 8223.43                                                                | Temperature (degree C) | 26.960               |
|                             |                      |                          |                                                                        | Spectrum Offset (Hz)   | 2471.0088            |

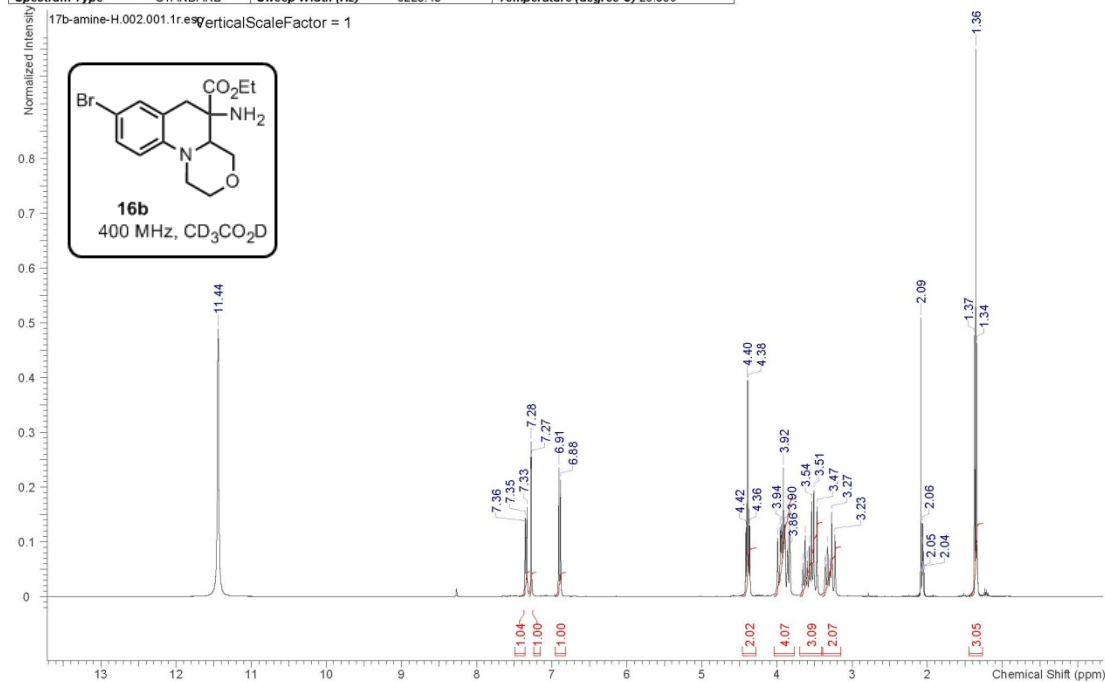



| OriginalDateForRelativeTime 2014-04-28T22:22:56 |                      | Number of Nuclei 0 C's |                                                                       |                        |                      |
|-------------------------------------------------|----------------------|------------------------|-----------------------------------------------------------------------|------------------------|----------------------|
| Acquisition Time (sec)                          | 1.3864               | Comment                | carbon_QNP_2500 Acetic (C:u) fbriones 30                              | Date                   | 28 Apr 2014 22:22:56 |
| Date Stamp                                      | 28 Apr 2014 22:22:56 | File Name              | C:\Users\kwmk459\Desktop\OL-NMR\Table 3\amines\17b-amine-C11\data\11r | Origin                 | spect                |
| Frequency (MHz)                                 | 100.62               | Nucleus                | 13C                                                                   | Number of Transients   | 2500                 |
| Original Points Count                           | 32768                | Owner                  | usbodlab                                                              | Points Count           | 32768                |
| Receiver Gain                                   | 16384.00             | SW(cyclical) (Hz)      | 23980.81                                                              | Solvent                | Acetic               |
| Spectrum Type                                   | STANDARD             | Sweep Width (Hz)       | 23980.08                                                              | Temperature (degree C) | 28.560               |
|                                                 |                      |                        |                                                                       | Pulse Sequence         | zgpg30               |
|                                                 |                      |                        |                                                                       | Spectrum Offset (Hz)   | 10062.3730           |

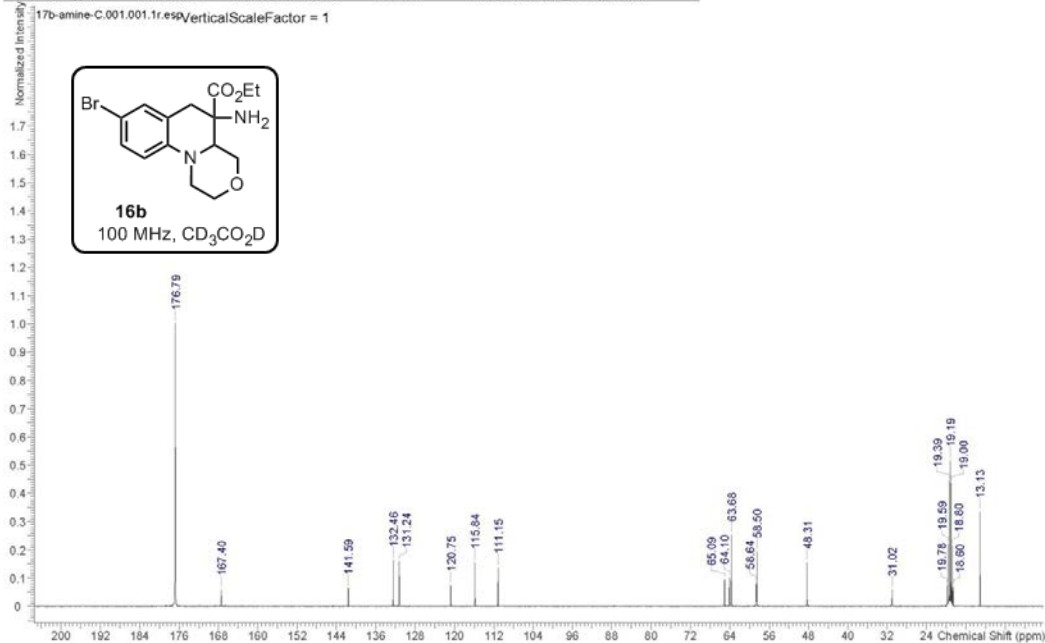

| OriginalDateForRelativeTime 2014-05-07T13:48:48 |                      | Multiplets Integrals Sum 0.00 |                                                                       | Number of Nuclei 0 H's |                      |
|-------------------------------------------------|----------------------|-------------------------------|-----------------------------------------------------------------------|------------------------|----------------------|
| Acquisition Time (sec)                          | 0.9961               | Comment                       | proton_longdelay_QNP_16 Acetic (C:u) fbriones 13                      | Date                   | 07 May 2014 13:48:48 |
| Date Stamp                                      | 07 May 2014 13:48:48 | File Name                     | C:\Users\kwmk459\Desktop\OL-NMR\Table 3\amines\17c-amine-H11\data\11r | Origin                 | spect                |
| Frequency (MHz)                                 | 400.13               | Nucleus                       | 1H                                                                    | Number of Transients   | 16                   |
| Original Points Count                           | 8192                 | Owner                         | usbodlab                                                              | Points Count           | 32768                |
| Receiver Gain                                   | 71.80                | SW(cyclical) (Hz)             | 8223.68                                                               | Solvent                | Acetic               |
| Spectrum Type                                   | STANDARD             | Sweep Width (Hz)              | 8223.43                                                               | Temperature (degree C) | 27.060               |
|                                                 |                      |                               |                                                                       | Pulse Sequence         | zg30                 |
|                                                 |                      |                               |                                                                       | Spectrum Offset (Hz)   | 2471.0088            |

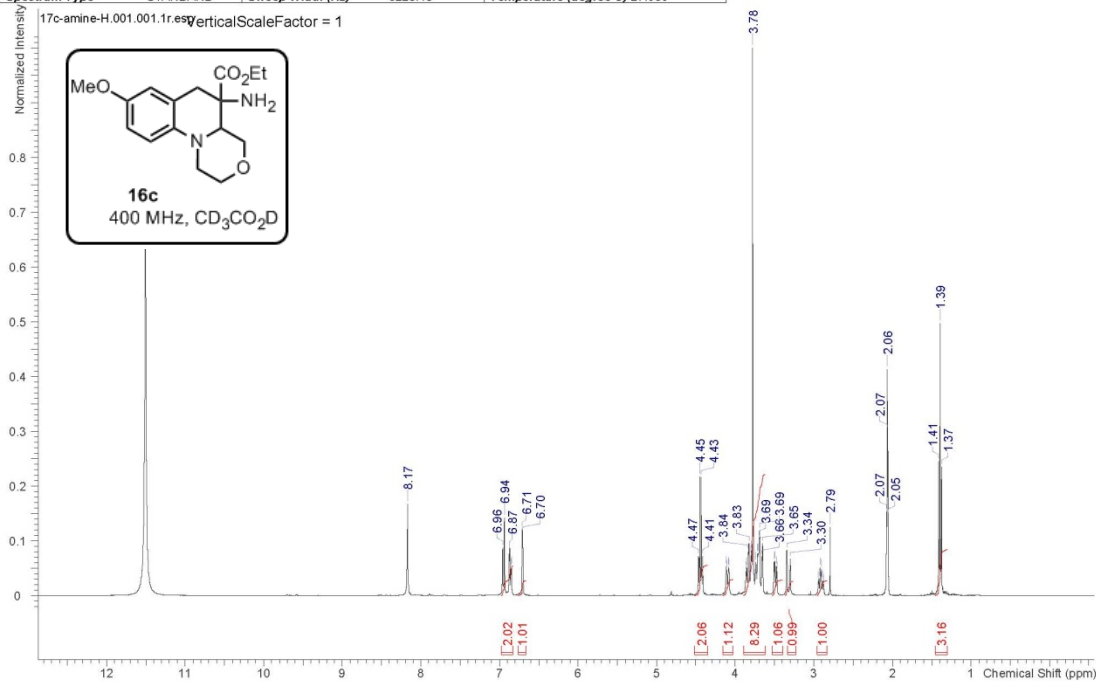

| OriginalDateForRelativeTime 2014-05-07T23:37:36 |                      | Number of Nuclei  |                                                                        | 0 C's                  |                      |
|-------------------------------------------------|----------------------|-------------------|------------------------------------------------------------------------|------------------------|----------------------|
| Acquisition Time (sec)                          | 1.3664               | Comment           | carbon_QNP_2500 Acetic (C:\u) fbriones 13                              | Date                   | 07 May 2014 23:37:36 |
| Date Stamp                                      | 07 May 2014 23:37:36 | File Name         | C:\Users\kwmk459\Desktop\OL-NMR\Table 3\amines\17c-amine-C1\pdata\1\1r |                        |                      |
| Frequency (MHz)                                 | 100.62               | Nucleus           | 13C                                                                    | Number of Transients   | 2500                 |
| Original Points Count                           | 32768                | Owner             | usbodlab                                                               | Points Count           | 32768                |
| Receiver Gain                                   | 14596.50             | SW(cyclical) (Hz) | 23980.81                                                               | Solvent                | Acetic               |
| Spectrum Type                                   | STANDARD             | Sweep Width (Hz)  | 23980.08                                                               | Temperature (degree C) | 29.060               |
|                                                 |                      |                   |                                                                        | Pulse Sequence         | zgpg30               |
|                                                 |                      |                   |                                                                        | Spectrum Offset (Hz)   | 10062.3730           |

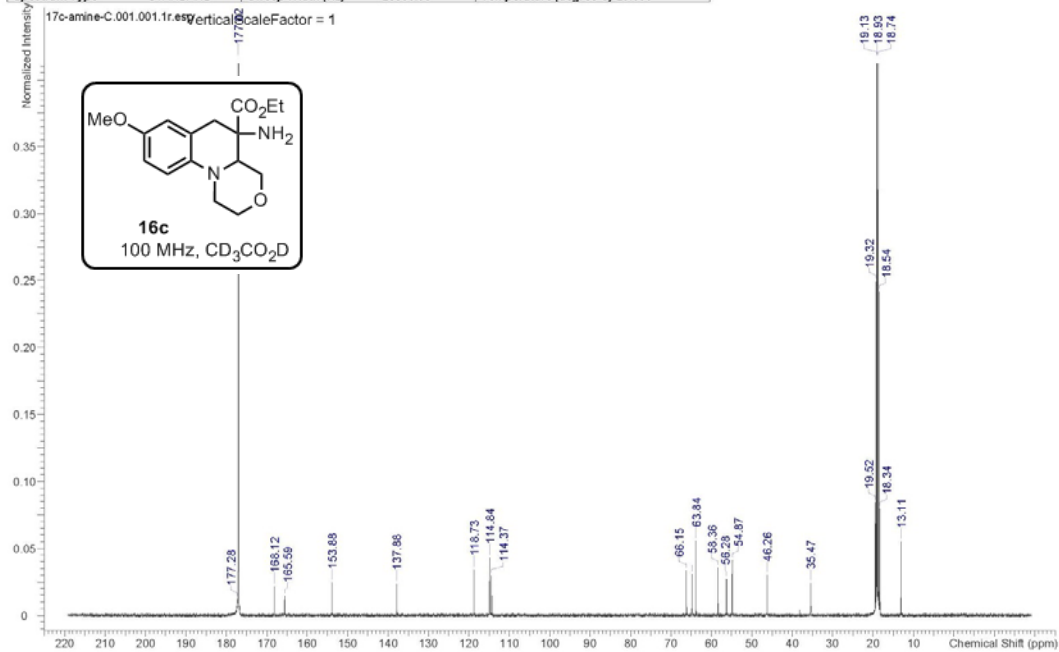

| OriginalDateForRelativeTime 2014-05-21T17:32:48 |                      | Multipliers Integrals Sum |                                                                       | 0.00                 |                      | Number of Nuclei       |        | 0 H's |  |
|-------------------------------------------------|----------------------|---------------------------|-----------------------------------------------------------------------|----------------------|----------------------|------------------------|--------|-------|--|
| Acquisition Time (sec)                          | 0.9961               | Comment                   | proton_QNP_128 CDCl3 (C:\u) fbriones 45                               | Date                 | 21 May 2014 17:32:48 |                        |        |       |  |
| Date Stamp                                      | 21 May 2014 17:32:48 | File Name                 | C:\Users\kwmk459\Desktop\OL-NMR\Table 3\amines\17d-amine\1\pdata\1\1r |                      |                      |                        |        |       |  |
| Frequency (MHz)                                 | 400.13               | Nucleus                   | 1H                                                                    | Number of Transients | 128                  | Origin                 | spect  |       |  |
| Original Points Count                           | 8192                 | Owner                     | usbodlab                                                              | Points Count         | 32768                | Pulse Sequence         | zg30   |       |  |
| Receiver Gain                                   | 45.30                | SW(cyclical) (Hz)         | 8223.68                                                               | Solvent              | CHLOROFORM-d         |                        |        |       |  |
| Spectrum Offset (Hz)                            | 2471.0088            | Spectrum Type             | STANDARD                                                              | Sweep Width (Hz)     | 8223.43              | Temperature (degree C) | 26.960 |       |  |

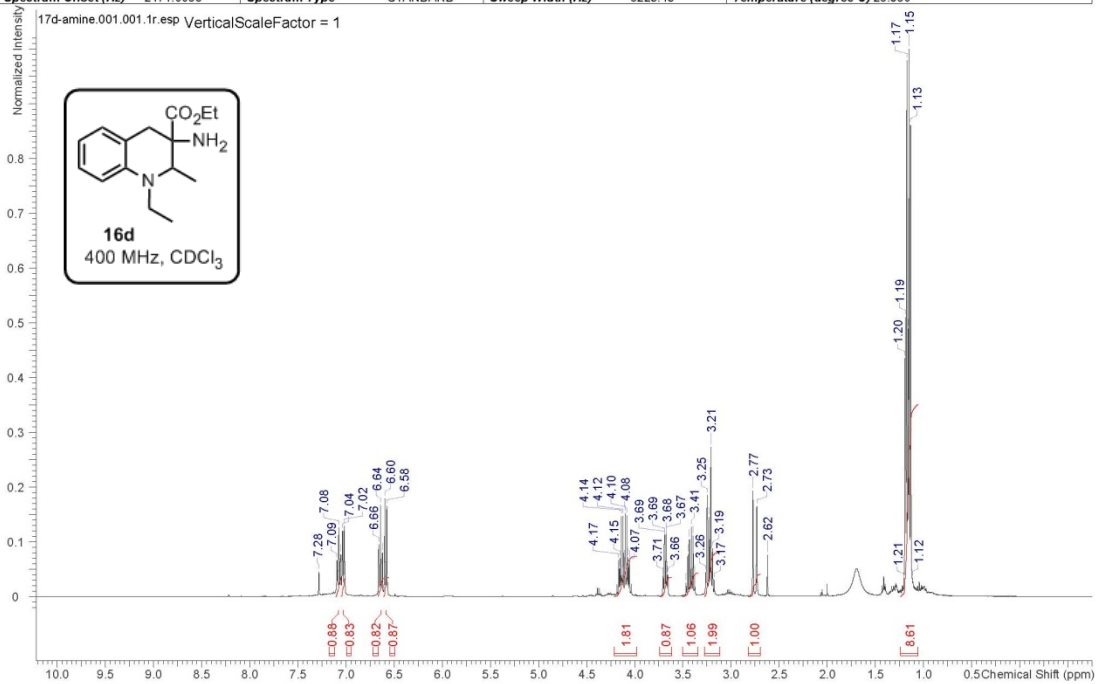

| OriginalDateForRelativeTime 2014-05-22T05:27:28 |                      | Number of Nuclei  |                                                                       | 0 C's                  |                      |
|-------------------------------------------------|----------------------|-------------------|-----------------------------------------------------------------------|------------------------|----------------------|
| Acquisition Time (sec)                          | 1.3664               | Comment           | carbon_QNP_2500 CDCl3 (C-13) fbriones 45                              | Date                   | 22 May 2014 05:27:28 |
| Date Stamp                                      | 22 May 2014 05:27:28 | File Name         | C:\Users\kmmw459\Desktop\OL-NMR\Table 3\amines\17d-amine\2\data\1\11r | Origin                 | spect                |
| Frequency (MHz)                                 | 100.62               | Nucleus           | 13C                                                                   | Number of Transients   | 2500                 |
| Original Points Count                           | 32768                | Owner             | usbodlab                                                              | Points Count           | 32768                |
| Receiver Gain                                   | 16384.00             | SW(cyclical) (Hz) | 23980.81                                                              | Solvent                | CHLOROFORM-d         |
| Spectrum Offset (Hz)                            | 10062.3730           | Spectrum Type     | STANDARD                                                              | Sweep Width (Hz)       | 23980.08             |
|                                                 |                      |                   |                                                                       | Temperature (degree C) | 29.080               |

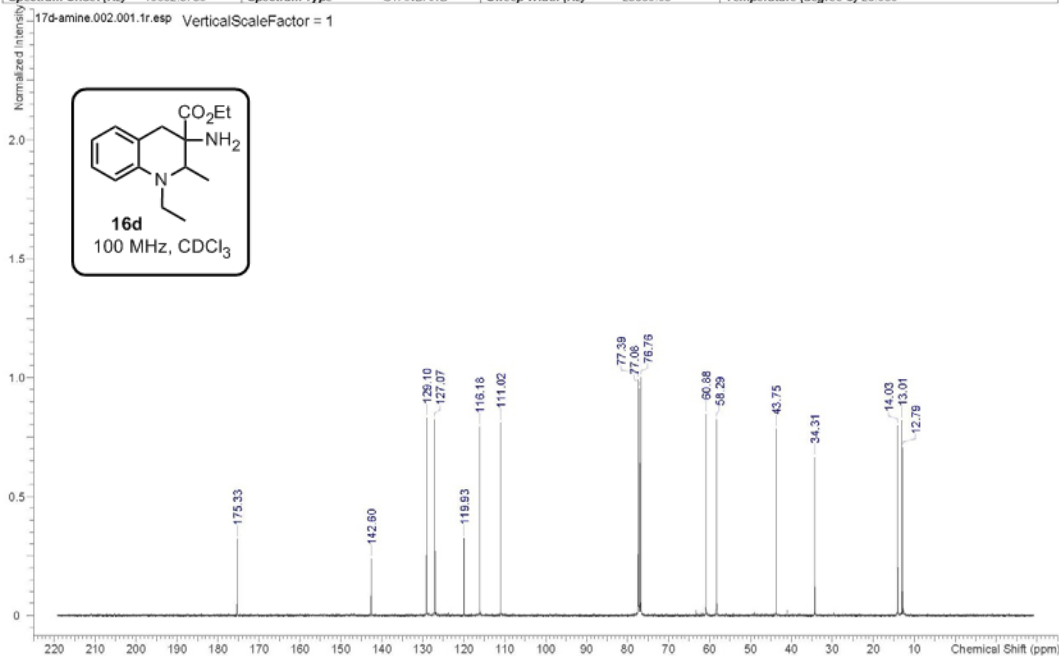

| OriginalDateForRelativeTime 2014-06-16T10:36:48 |                      | Multiplets Integrals Sum |                                                                         | Number of Nuclei       |                      |
|-------------------------------------------------|----------------------|--------------------------|-------------------------------------------------------------------------|------------------------|----------------------|
| Acquisition Time (sec)                          | 0.9961               | Comment                  | proton_QNP_128 CDCl3 (C-13) fbriones 36                                 | Date                   | 16 Jun 2014 10:36:48 |
| Date Stamp                                      | 16 Jun 2014 10:36:48 | File Name                | C:\Users\kmmw459\Desktop\OL-NMR\Table 3\amines\17g-amine-H\1\data\1\11r | Origin                 | spect                |
| Frequency (MHz)                                 | 400.13               | Nucleus                  | 1H                                                                      | Number of Transients   | 128                  |
| Original Points Count                           | 8192                 | Owner                    | usbodlab                                                                | Points Count           | 32768                |
| Receiver Gain                                   | 161.30               | SW(cyclical) (Hz)        | 8223.68                                                                 | Solvent                | CHLOROFORM-d         |
| Spectrum Offset (Hz)                            | 2433.1646            | Spectrum Type            | STANDARD                                                                | Sweep Width (Hz)       | 8223.43              |
|                                                 |                      |                          |                                                                         | Temperature (degree C) | 26.960               |

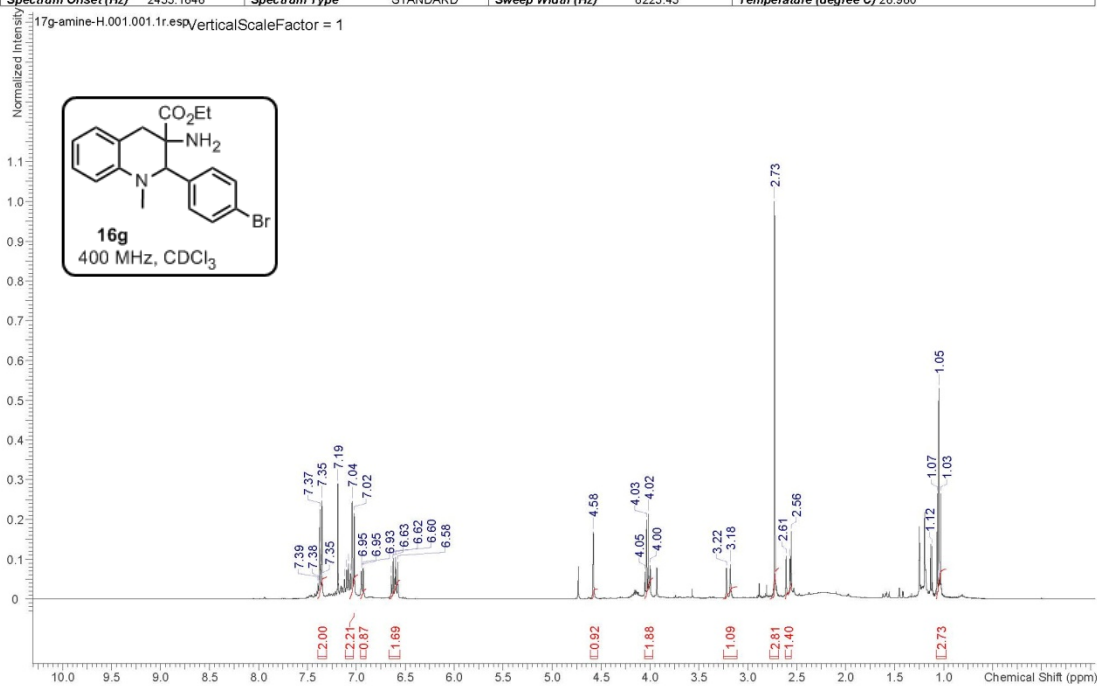

| OriginalDateForRelativeTime 2014-06-16T21:48:48 |                      | Number of Nuclei  |                                                                            | 0 C's                  |                      |
|-------------------------------------------------|----------------------|-------------------|----------------------------------------------------------------------------|------------------------|----------------------|
| Acquisition Time (sec)                          | 1.3664               | Comment           | carbon_QNP_2500 CDCB3 (C:u) fbriones 24                                    | Date                   | 16 Jun 2014 21:48:48 |
| Date Stamp                                      | 16 Jun 2014 21:48:48 | File Name         | C:\Users\kmmw459\Desktop\OL-NMR\Table 3\amines\17g-amine-carbon\data\11\fr |                        |                      |
| Frequency (MHz)                                 | 100.62               | Nucleus           | <sup>13</sup> C                                                            | Number of Transients   | 2500                 |
| Original Points Count                           | 32768                | Owner             | usbodlab                                                                   | Points Count           | 32768                |
| Receiver Gain                                   | 18390.40             | SW(cyclical) (Hz) | 23980.81                                                                   | Solvent                | CHLOROFORM-d         |
| Spectrum Offset (Hz)                            | 10062.3730           | Spectrum Type     | STANDARD                                                                   | Sweep Width (Hz)       | 23980.08             |
|                                                 |                      |                   |                                                                            | Temperature (degree C) | 30.360               |

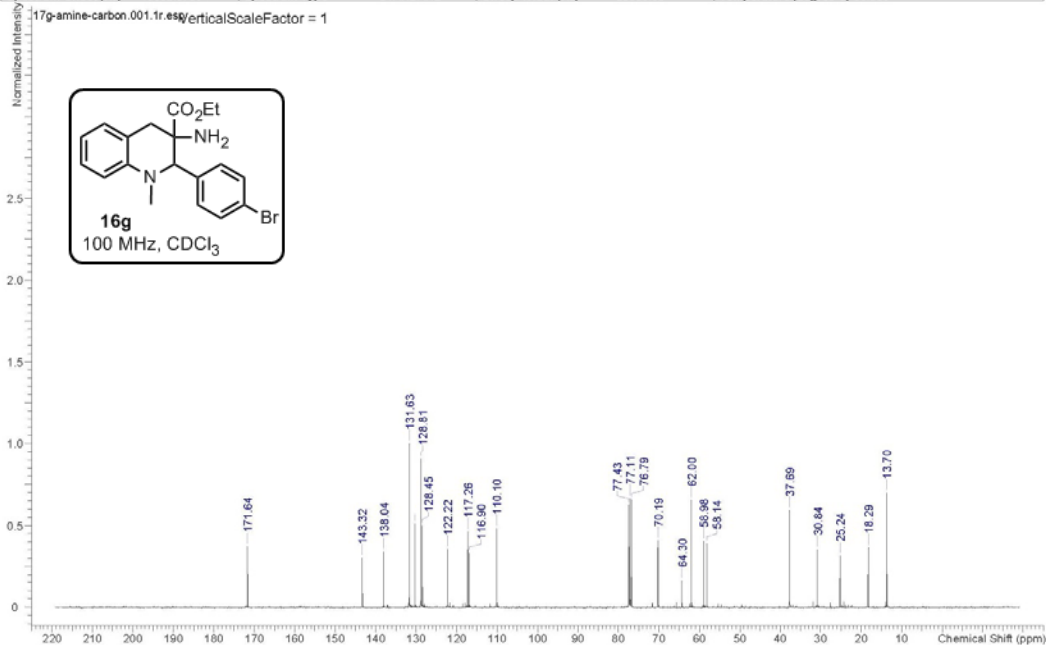

| OriginalDateForRelativeTime 2014-04-30T17:02:56 |                      | Multiplets Integrals Sum |                                                              | 0.00                   |                      | Number of Nuclei |  | 0 H's |  |
|-------------------------------------------------|----------------------|--------------------------|--------------------------------------------------------------|------------------------|----------------------|------------------|--|-------|--|
| Acquisition Time (sec)                          | 0.9961               | Comment                  | proton_QNP_128 DMSO (C:u) fbriones 43                        | Date                   | 30 Apr 2014 17:02:56 |                  |  |       |  |
| Date Stamp                                      | 30 Apr 2014 17:02:56 | File Name                | C:\Users\kmmw459\Desktop\OL-NMR\Table 3\17a-d1-H1\data\11\fr |                        |                      |                  |  |       |  |
| Frequency (MHz)                                 | 400.13               | Nucleus                  | <sup>1</sup> H                                               | Number of Transients   | 128                  |                  |  |       |  |
| Original Points Count                           | 8192                 | Owner                    | usbodlab                                                     | Points Count           | 32768                |                  |  |       |  |
| Receiver Gain                                   | 181.00               | SW(cyclical) (Hz)        | 8223.68                                                      | Solvent                | DMSO-d6              |                  |  |       |  |
| Spectrum Type                                   | STANDARD             | Spectrum Offset (Hz)     | 8223.43                                                      | Temperature (degree C) | 26.960               |                  |  |       |  |

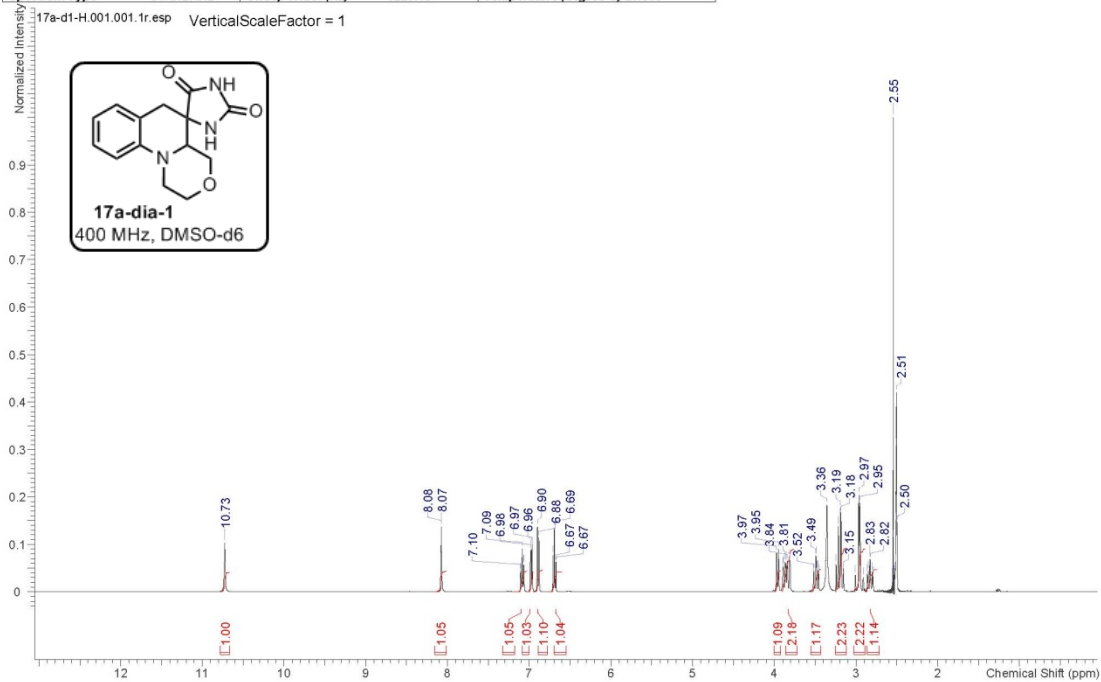

| OriginalDateForRelativeTime 2014-05-01T01:26:24 |                      | Number of Nucl    |                                                               | 0 C's                  |                      |
|-------------------------------------------------|----------------------|-------------------|---------------------------------------------------------------|------------------------|----------------------|
| Acquisition Time (sec)                          | 1.3664               | Comment           | carbon_QNP_2500 DMSO (C:u) fibriones 18                       | Date                   | 01 May 2014 01:26:24 |
| Date Stamp                                      | 01 May 2014 01:26:24 | File Name         | C:\Users\kwmk459\Desktop\OL-NMR\Table 3\17a-d1-C1\1p\data\11r | Original Points Count  | 32768                |
| Frequency (MHz)                                 | 100.62               | Nucleus           | 13C                                                           | Number of Transients   | 2500                 |
| Original Points Count                           | 32768                | Owner             | usbodlab                                                      | Points Count           | 32768                |
| Receiver Gain                                   | 8192.00              | SW(cyclical) (Hz) | 23980.81                                                      | Solvent                | DMSO-d6              |
| Spectrum Type                                   | STANDARD             | Sweep Width (Hz)  | 23980.08                                                      | Temperature (degree C) | 28.860               |
|                                                 |                      |                   |                                                               | Pulse Sequence         | zpgg30               |
|                                                 |                      |                   |                                                               | Spectrum Offset (Hz)   | 10012.0518           |

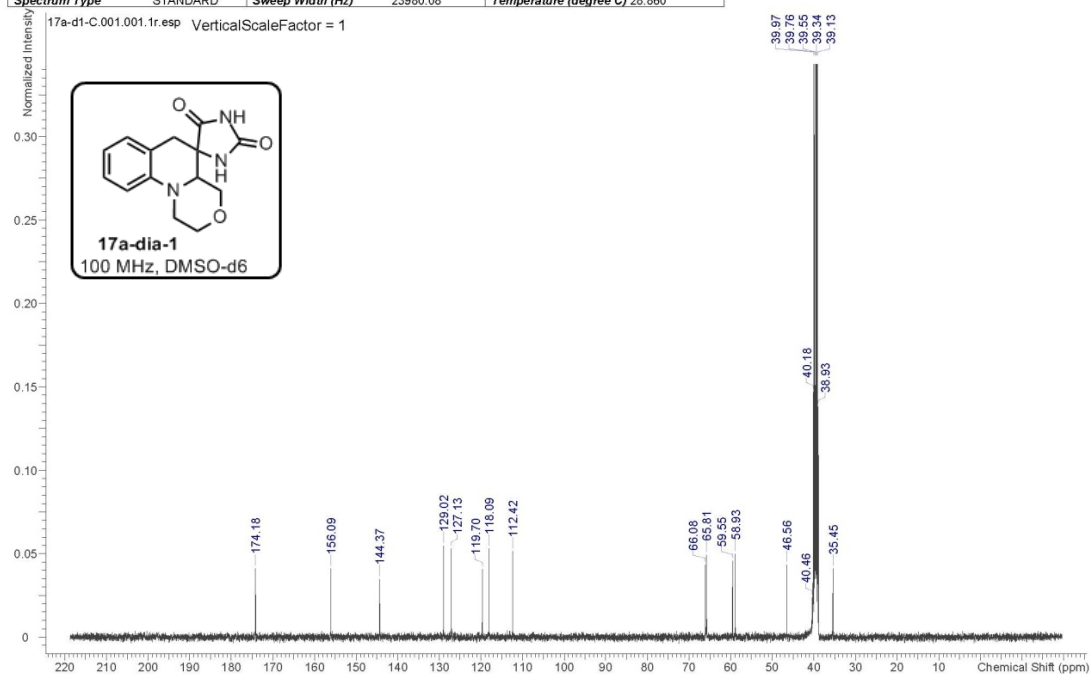

| OriginalDateForRelativeTime 2014-05-01T16:24:32 |                      | Multiplets Integrals Sum 0.00 |                                                              | Number of Nucl 0 H's   |                      |
|-------------------------------------------------|----------------------|-------------------------------|--------------------------------------------------------------|------------------------|----------------------|
| Acquisition Time (sec)                          | 0.9961               | Comment                       | proton_longdelay_QNP_16 DMSO (C:u) fibriones 52              | Date                   | 01 May 2014 16:24:32 |
| Date Stamp                                      | 01 May 2014 16:24:32 | File Name                     | C:\Users\kwmk459\Desktop\OL-NMR\Table 3\17a-d2-H\1p\data\11r | Original Points Count  | 8192                 |
| Frequency (MHz)                                 | 400.13               | Nucleus                       | 1H                                                           | Number of Transients   | 16                   |
| Original Points Count                           | 8192                 | Owner                         | usbodlab                                                     | Points Count           | 32768                |
| Receiver Gain                                   | 181.00               | SW(cyclical) (Hz)             | 8223.68                                                      | Solvent                | DMSO-d6              |
| Spectrum Type                                   | STANDARD             | Sweep Width (Hz)              | 8223.43                                                      | Temperature (degree C) | 26.960               |
|                                                 |                      |                               |                                                              | Pulse Sequence         | zg30                 |
|                                                 |                      |                               |                                                              | Spectrum Offset (Hz)   | 2471.0088            |

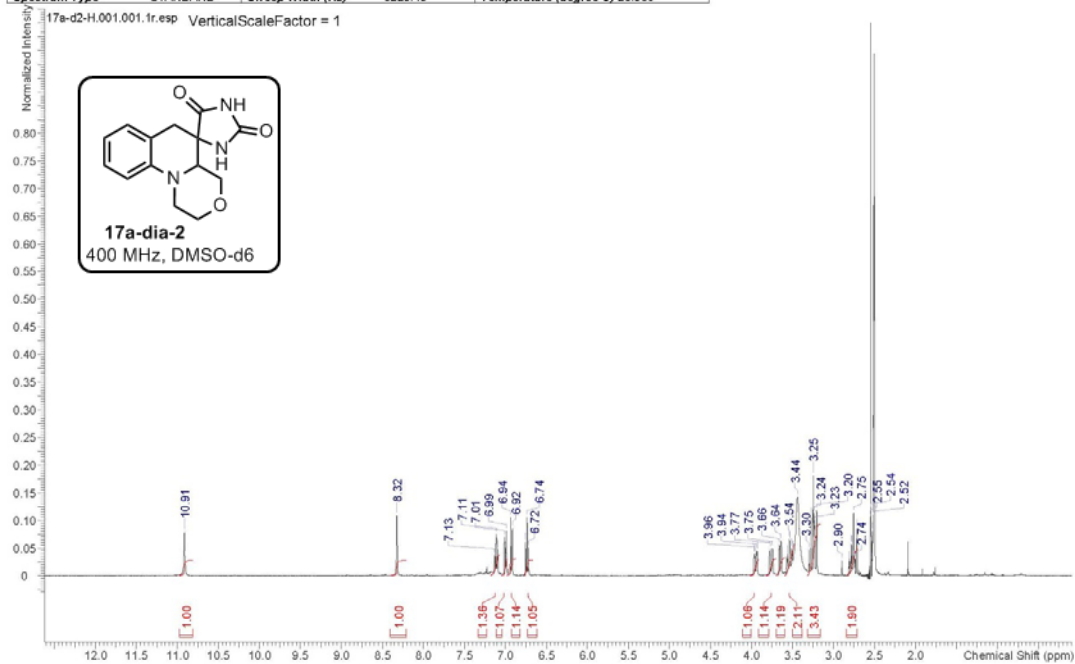

| OriginalDateForRelativeTime 2014-05-01T21:46:40 |                      | Number of Nuclei  |                                                              | 0 C's                  |                      |
|-------------------------------------------------|----------------------|-------------------|--------------------------------------------------------------|------------------------|----------------------|
| Acquisition Time (sec)                          | 1.3664               | Comment           | carbon_QNP_2500 DMSO (C-13) fibriones 52                     | Date                   | 01 May 2014 21:46:40 |
| Date Stamp                                      | 01 May 2014 21:46:40 | File Name         | C:\Users\kwmk459\Desktop\OL-NMR\Table 3\17a-d2-C1\pdata\1\1r |                        |                      |
| Frequency (MHz)                                 | 100.62               | Nucleus           | 13C                                                          | Number of Transients   | 2500                 |
| Original Points Count                           | 32768                | Owner             | usbodlab                                                     | Points Count           | 32768                |
| Receiver Gain                                   | 9195.20              | SW(cyclical) (Hz) | 23980.81                                                     | Solvent                | DMSO-d6              |
| Spectrum Type                                   | STANDARD             | Sweep Width (Hz)  | 23980.08                                                     | Temperature (degree C) | 29.060               |
|                                                 |                      |                   |                                                              | Spectrum Offset (Hz)   | 10012.0518           |

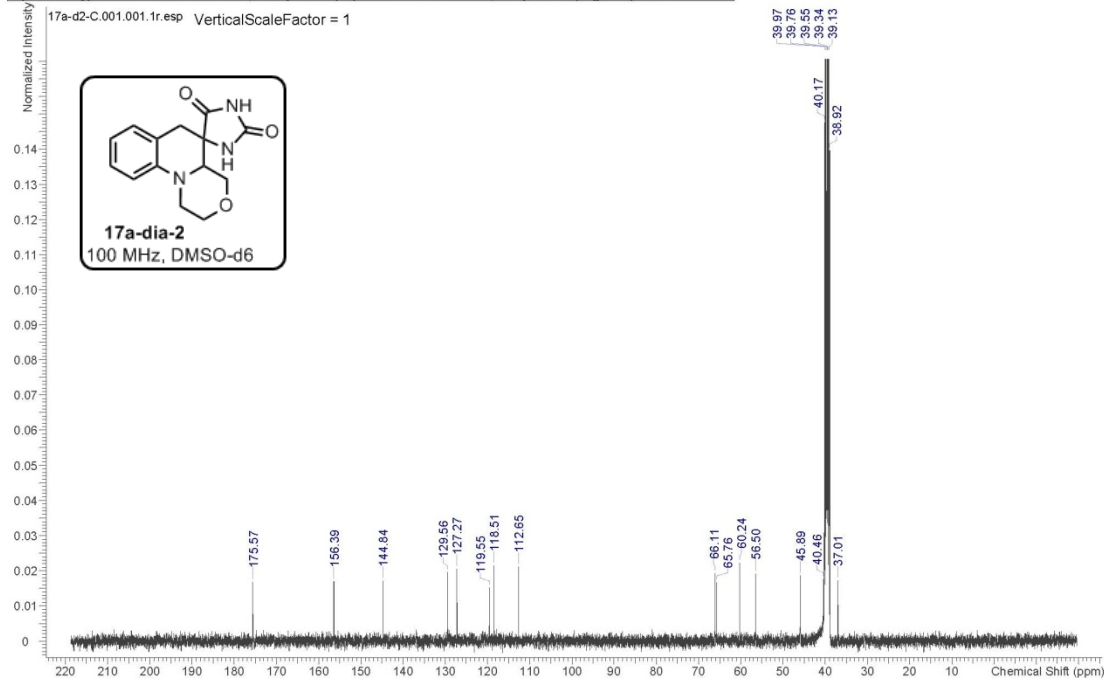

| OriginalDateForRelativeTime 2014-05-15T16:28:48 |                      | Multiplets Integrals Sum |                                                           | 0.00                   |                      | Number of Nuclei |  | 0 H's |  |
|-------------------------------------------------|----------------------|--------------------------|-----------------------------------------------------------|------------------------|----------------------|------------------|--|-------|--|
| Acquisition Time (sec)                          | 0.9961               | Comment                  | proton_QNP_128 DMSO (C-13) fibriones 43                   | Date                   | 15 May 2014 16:28:48 |                  |  |       |  |
| Date Stamp                                      | 15 May 2014 16:28:48 | File Name                | C:\Users\kwmk459\Desktop\OL-NMR\Table 3\17b-H2\pdata\1\1r |                        |                      |                  |  |       |  |
| Frequency (MHz)                                 | 400.13               | Nucleus                  | 1H                                                        | Number of Transients   | 128                  |                  |  |       |  |
| Original Points Count                           | 8192                 | Owner                    | usbodlab                                                  | Points Count           | 32768                |                  |  |       |  |
| Receiver Gain                                   | 161.30               | SW(cyclical) (Hz)        | 8223.68                                                   | Solvent                | DMSO-d6              |                  |  |       |  |
| Spectrum Type                                   | STANDARD             | Sweep Width (Hz)         | 8223.43                                                   | Temperature (degree C) | 26.960               |                  |  |       |  |
|                                                 |                      |                          |                                                           | Spectrum Offset (Hz)   | 2471.0088            |                  |  |       |  |

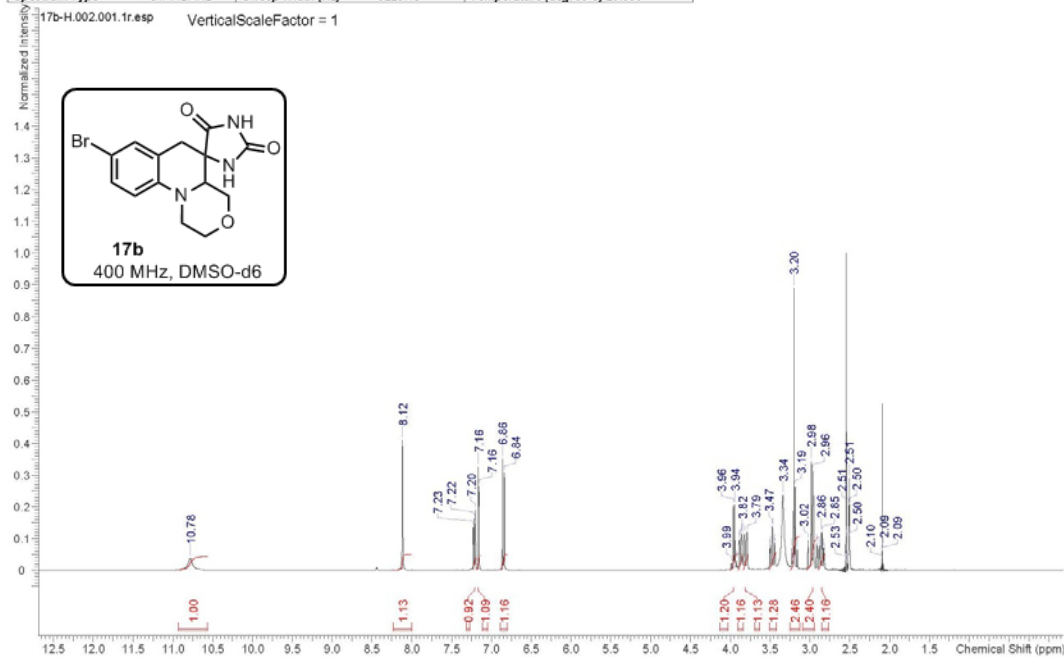

| OriginalDateForRelativeTime 2014-05-15T23:37:36 |                      | Number of Nuclei 0 C's |                                                           |
|-------------------------------------------------|----------------------|------------------------|-----------------------------------------------------------|
| Acquisition Time (sec)                          | 1.3664               | Comment                | carbon_QNP_2500 DMSO (C:u) fibriones 43                   |
| Date Stamp                                      | 15 May 2014 23:37:36 | File Name              | C:\Users\kmmw459\Desktop\OL-NMR\Table 3117b-C1\pdata1\11r |
| Frequency (MHz)                                 | 100.62               | Nucleus                | <sup>13</sup> C                                           |
| Original Points Count                           | 32768                | Owner                  | usbodlab                                                  |
| Receiver Gain                                   | 6502.00              | SW(cyclical) (Hz)      | 23980.81                                                  |
| Spectrum Type                                   | STANDARD             | Sweep Width (Hz)       | 23980.08                                                  |
|                                                 |                      | Temperature (degree C) | 28.860                                                    |
|                                                 |                      | Number of Transients   | 2500                                                      |
|                                                 |                      | Points Count           | 32768                                                     |
|                                                 |                      | Solvent                | DMSO-d6                                                   |
|                                                 |                      | Pulse Sequence         | zgpg30                                                    |
|                                                 |                      | Spectrum Offset (Hz)   | 10012.0518                                                |

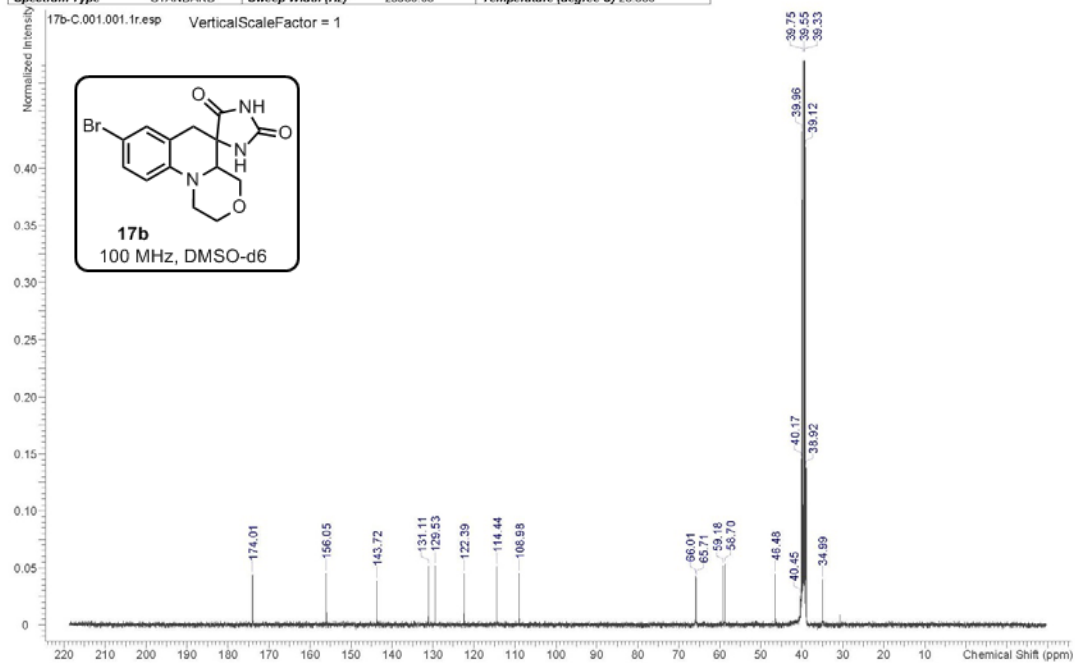

| OriginalDateForRelativeTime 2014-05-16T10:15:28 |                      | Multiplets Integrals Sum 0.00 |                                                           | Number of Nuclei 0 H's |                      |
|-------------------------------------------------|----------------------|-------------------------------|-----------------------------------------------------------|------------------------|----------------------|
| Acquisition Time (sec)                          | 0.9961               | Comment                       | proton_QNP_128 DMSO (C:u) fibriones 3                     | Date                   | 16 May 2014 10:15:28 |
| Date Stamp                                      | 16 May 2014 10:15:28 | File Name                     | C:\Users\kmmw459\Desktop\OL-NMR\Table 3117c-H1\pdata1\11r |                        |                      |
| Frequency (MHz)                                 | 400.13               | Nucleus                       | <sup>1</sup> H                                            | Number of Transients   | 128                  |
| Original Points Count                           | 8192                 | Owner                         | usbodlab                                                  | Points Count           | 32768                |
| Receiver Gain                                   | 181.00               | SW(cyclical) (Hz)             | 8223.68                                                   | Solvent                | DMSO-d6              |
| Spectrum Type                                   | STANDARD             | Sweep Width (Hz)              | 8223.43                                                   | Temperature (degree C) | 27.060               |
|                                                 |                      |                               |                                                           | Pulse Sequence         | zg30                 |
|                                                 |                      |                               |                                                           | Spectrum Offset (Hz)   | 2471.0088            |

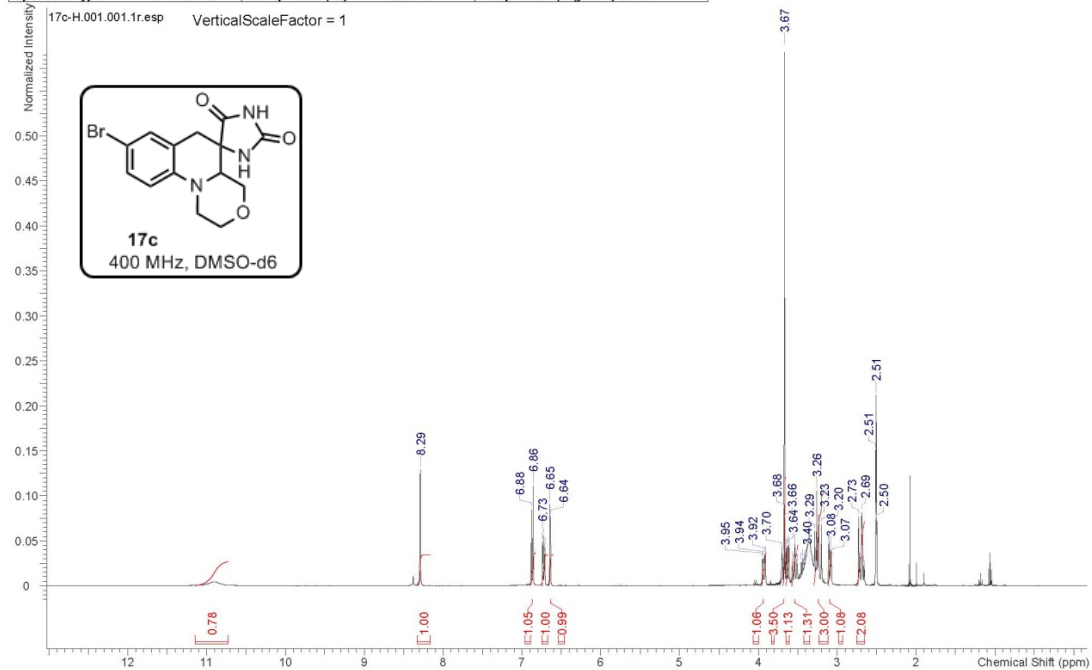

| OriginalDateForRelativeTime 2014-05-16T21:48:48 |                      | Number of Nuclei 0 C's |                                                           |                        |                      |
|-------------------------------------------------|----------------------|------------------------|-----------------------------------------------------------|------------------------|----------------------|
| Acquisition Time (sec)                          | 1.3664               | Comment                | carbon_QNP_2500 DMSO (C:u) fibriones 3                    | Date                   | 16 May 2014 21:48:48 |
| Date Stamp                                      | 16 May 2014 21:48:48 | File Name              | C:\Users\kmmk459\Desktop\OL-NMR\Table 3\17c-C1\pdata\1\1r |                        |                      |
| Frequency (MHz)                                 | 100.62               | Nucleus                | 13C                                                       | Number of Transients   | 2500                 |
| Original Points Count                           | 32768                | Owner                  | usbodlab                                                  | Points Count           | 32768                |
| Receiver Gain                                   | 13004.00             | SW(cyclical) (Hz)      | 23980.81                                                  | Solvent                | DMSO-d6              |
| Spectrum Type                                   | STANDARD             | Sweep Width (Hz)       | 23980.08                                                  | Temperature (degree C) | 28.860               |
|                                                 |                      |                        |                                                           | Origin                 | spect                |
|                                                 |                      |                        |                                                           | Pulse Sequence         | zgpg30               |
|                                                 |                      |                        |                                                           | Spectrum Offset (Hz)   | 10012.0518           |

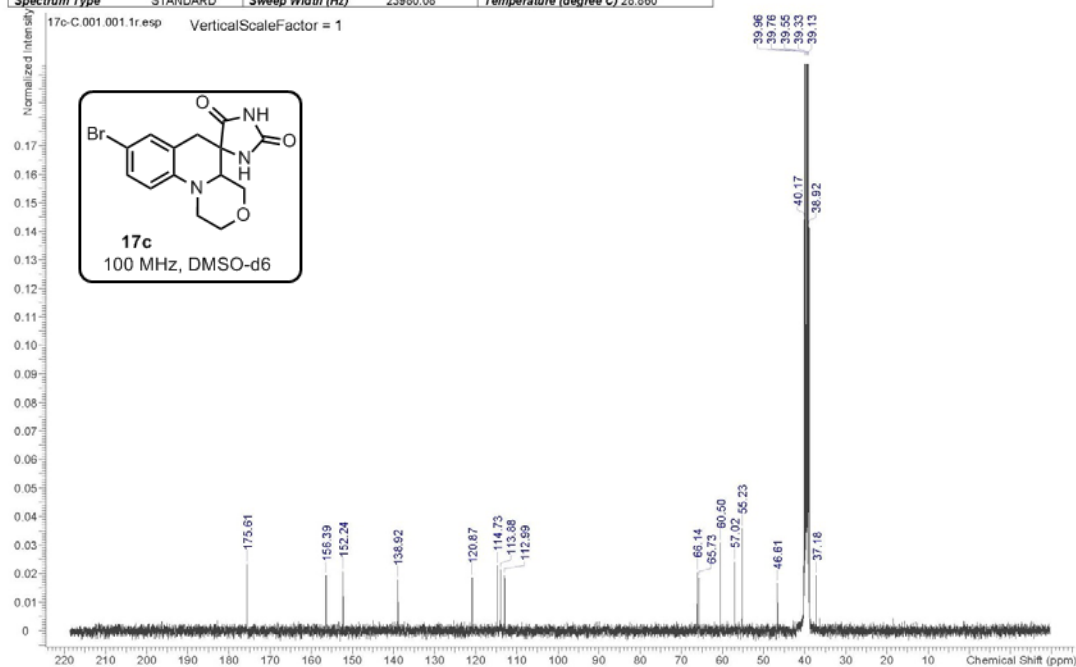

| OriginalDateForRelativeTime 2014-06-04T11:00:16 |                      | Multiplets Integrals Sum 0.00 |                                                                        | Number of Nuclei 0 H's |                      |
|-------------------------------------------------|----------------------|-------------------------------|------------------------------------------------------------------------|------------------------|----------------------|
| Acquisition Time (sec)                          | 0.9961               | Comment                       | proton_QNP_128 DMSO (C:u) fibriones 40                                 | Date                   | 04 Jun 2014 11:00:16 |
| Date Stamp                                      | 04 Jun 2014 11:00:16 | File Name                     | C:\Users\kmmk459\Desktop\OL-NMR\Table 3\EN07375-48A-SPIRO\1\pdata\1\1r |                        |                      |
| Frequency (MHz)                                 | 400.13               | Nucleus                       | 1H                                                                     | Number of Transients   | 128                  |
| Original Points Count                           | 8192                 | Owner                         | usbodlab                                                               | Points Count           | 32768                |
| Receiver Gain                                   | 90.50                | SW(cyclical) (Hz)             | 8223.68                                                                | Solvent                | DMSO-d6              |
| Spectrum Type                                   | STANDARD             | Sweep Width (Hz)              | 8223.43                                                                | Temperature (degree C) | 27.060               |
|                                                 |                      |                               |                                                                        | Origin                 | spect                |
|                                                 |                      |                               |                                                                        | Pulse Sequence         | zg30                 |
|                                                 |                      |                               |                                                                        | Spectrum Offset (Hz)   | 2471.0088            |

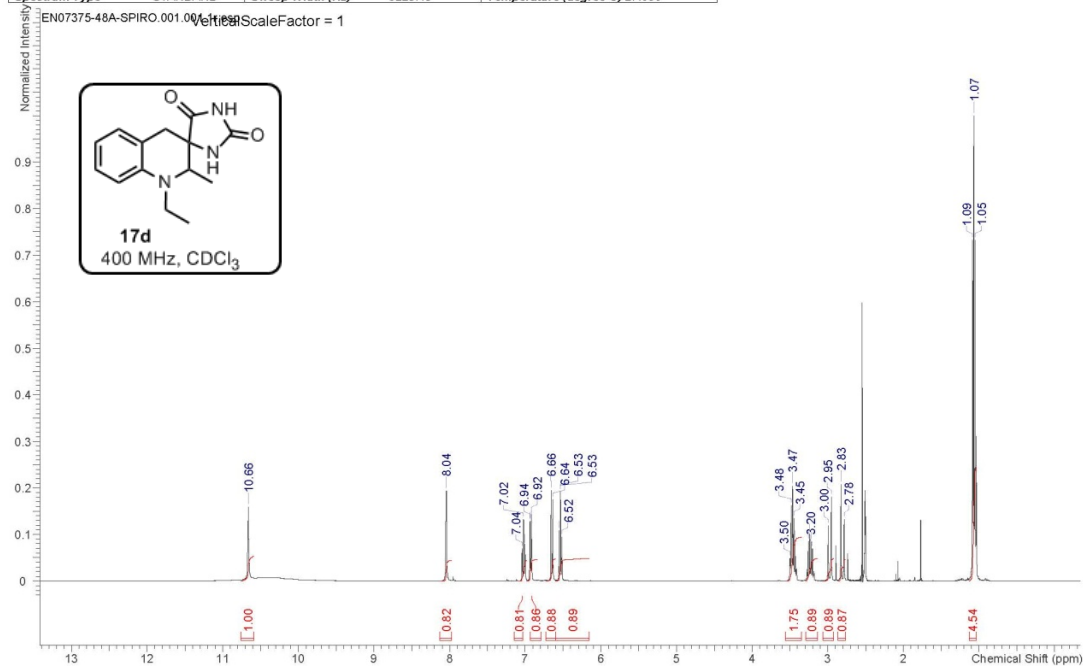



| OriginalDateForRelativeTime 2014-06-04T21:48:48 |                      | Number of Nuclei  |                                                                         | 0 C's                  |                      |
|-------------------------------------------------|----------------------|-------------------|-------------------------------------------------------------------------|------------------------|----------------------|
| Acquisition Time (sec)                          | 1.3884               | Comment           | carbon_QNP_2500 CDCl3 (C:u) fibriones 42                                | Date                   | 04 Jun 2014 21:48:48 |
| Date Stamp                                      | 04 Jun 2014 21:48:48 | File Name         | C:\Users\krmwk459\Desktop\OL-NMR\TTable 3\EN07375-48B-SPIRO\2\data\111r |                        |                      |
| Frequency (MHz)                                 | 100.62               | Nucleus           | 13C                                                                     | Number of Transients   | 2500                 |
| Original Points Count                           | 32768                | Owner             | usbodlab                                                                | Points Count           | 32768                |
| Receiver Gain                                   | 16384.00             | SW(cyclical) (Hz) | 23980.81                                                                | Solvent                | CHLOROFORM-d         |
| Spectrum Offset (Hz)                            | 10062.3730           | Spectrum Type     | STANDARD                                                                | Sweep Width (Hz)       | 23980.08             |
|                                                 |                      |                   |                                                                         | Temperature (degree C) | 29.060               |

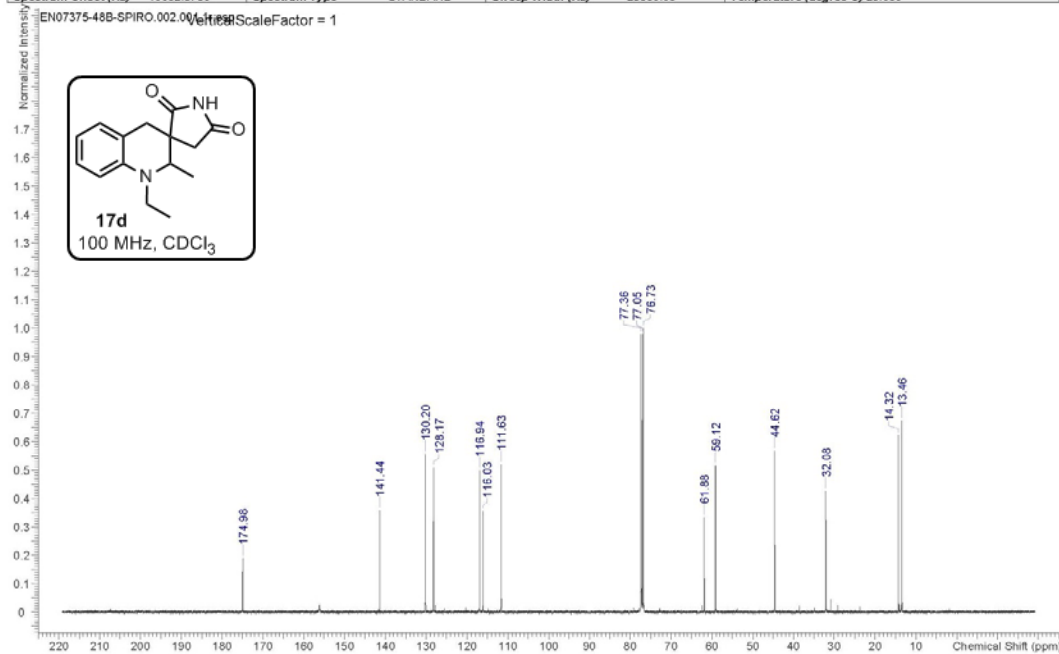

| OriginalDateForRelativeTime 2015-02-20T09:53:52 |                      | Multiplets Integrals Sum |                                                              | 0.00                   |                      | Number of Nuclei |  | 0 H's |  |
|-------------------------------------------------|----------------------|--------------------------|--------------------------------------------------------------|------------------------|----------------------|------------------|--|-------|--|
| Acquisition Time (sec)                          | 0.9961               | Comment                  | proton_longdelay_QNP_16 DMSO (C:u) fibriones 1               | Date                   | 20 Feb 2015 09:53:52 |                  |  |       |  |
| Date Stamp                                      | 20 Feb 2015 09:53:52 | File Name                | C:\Users\krmwk459\Desktop\OL-NMR\TTable 3\17e-d1\2\data\111r |                        |                      |                  |  |       |  |
| Frequency (MHz)                                 | 400.13               | Nucleus                  | 1H                                                           | Number of Transients   | 16                   |                  |  |       |  |
| Original Points Count                           | 8192                 | Owner                    | usbodlab                                                     | Points Count           | 32768                |                  |  |       |  |
| Receiver Gain                                   | 181.00               | SW(cyclical) (Hz)        | 8223.68                                                      | Solvent                | DMSO-d6              |                  |  |       |  |
| Spectrum Type                                   | STANDARD             | Sweep Width (Hz)         | 8223.43                                                      | Temperature (degree C) | 26.960               |                  |  |       |  |
|                                                 |                      |                          |                                                              | Spectrum Offset (Hz)   | 2471.0088            |                  |  |       |  |

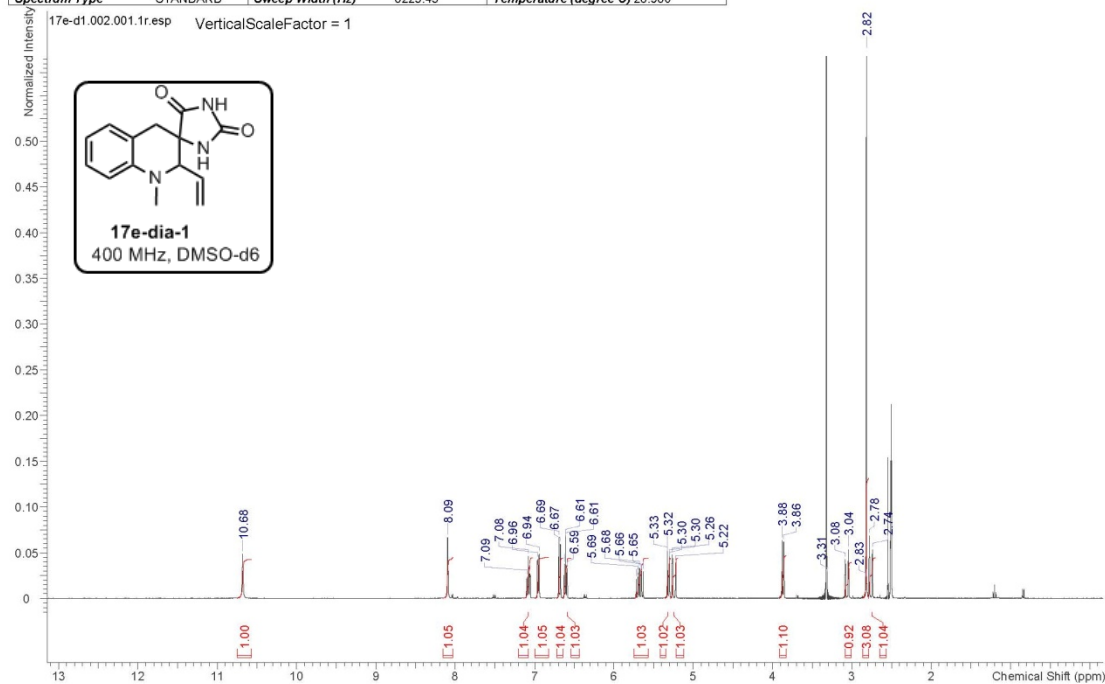

| OriginalDateForRelativeTime 2015-02-21T01:30:24 |                      | Number of Nuclei 0 C's |                                                             |
|-------------------------------------------------|----------------------|------------------------|-------------------------------------------------------------|
| Acquisition Time (sec)                          | 1.3664               | Comment                | carbon_QNP_8000 DMSO (C:\u) fibriones 1                     |
| Date Stamp                                      | 21 Feb 2015 01:30:24 | File Name              | C:\Users\krmwk459\Desktop\OL-NMR\Table 3\17e-d1\3\data\111r |
| Frequency (MHz)                                 | 100.62               | Nucleus                | 13C                                                         |
| Original Points Count                           | 32768                | Owner                  | usbodlab                                                    |
| Receiver Gain                                   | 13004.00             | SW(cyclical) (Hz)      | 23980.81                                                    |
| Spectrum Type                                   | STANDARD             | Sweep Width (Hz)       | 23980.08                                                    |
|                                                 |                      | Solvent                | DMSO-d6                                                     |
|                                                 |                      | Temperature (degree C) | 28.360                                                      |
|                                                 |                      | Origin                 | spect                                                       |
|                                                 |                      | Pulse Sequence         | zgpg30                                                      |
|                                                 |                      | Spectrum Offset (Hz)   | 10012.0518                                                  |

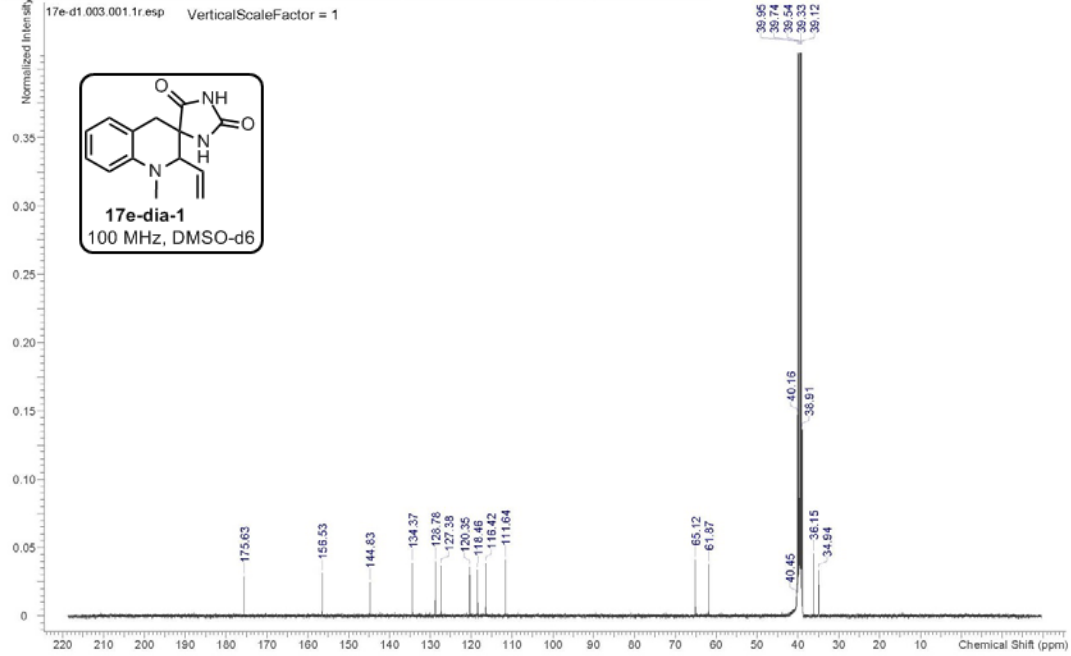

| OriginalDateForRelativeTime 2015-02-23T15:56:32 |                      | Multiplets Integrals Sum 0.00 |                                                             | Number of Nuclei 0 H's |                      |
|-------------------------------------------------|----------------------|-------------------------------|-------------------------------------------------------------|------------------------|----------------------|
| Acquisition Time (sec)                          | 0.9981               | Comment                       | proton_longdelay_QNP_18 DMSO (C:\u) fibriones 20            | Date                   | 23 Feb 2015 15:56:32 |
| Date Stamp                                      | 23 Feb 2015 15:56:32 | File Name                     | C:\Users\krmwk459\Desktop\OL-NMR\Table 3\17e-d2\3\data\111r | Origin                 | spect                |
| Frequency (MHz)                                 | 400.13               | Nucleus                       | 1H                                                          | Points Count           | 32768                |
| Original Points Count                           | 8192                 | Owner                         | usbodlab                                                    | Solvent                | DMSO-d6              |
| Receiver Gain                                   | 161.30               | SW(cyclical) (Hz)             | 8223.68                                                     | Temperature (degree C) | 26.960               |
| Spectrum Type                                   | STANDARD             | Sweep Width (Hz)              | 8223.43                                                     | Spectrum Offset (Hz)   | 2471.0088            |

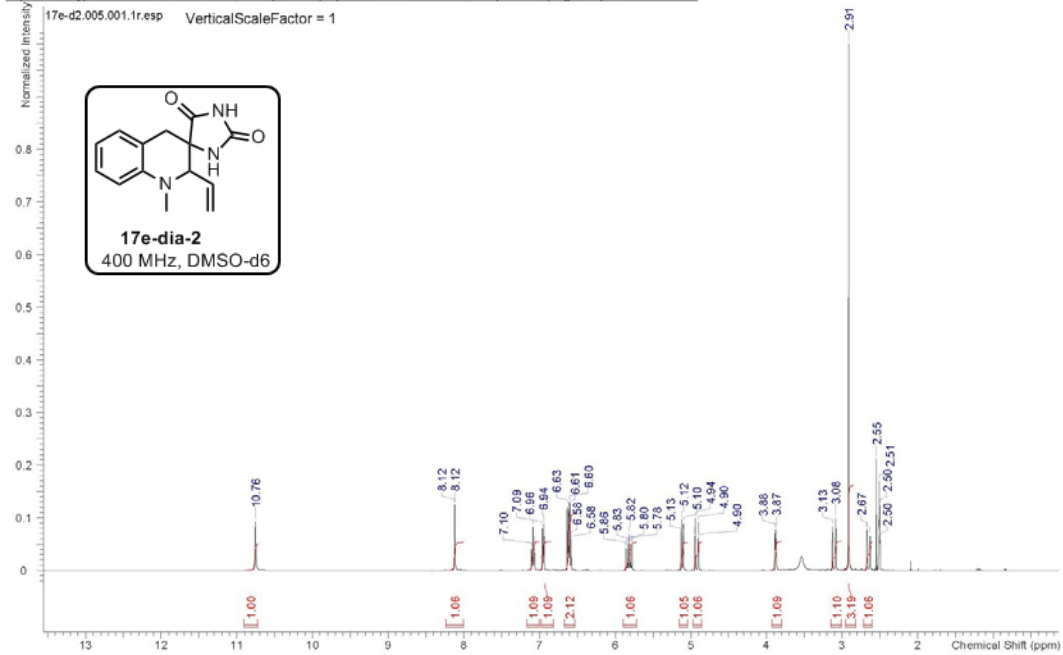

| OriginalDateForRelativeTime 2015-02-23T21:48:32 |                      | Number of Nuclei 0 C's |                                                            |
|-------------------------------------------------|----------------------|------------------------|------------------------------------------------------------|
| Acquisition Time (sec)                          | 1.3664               | Comment                | carbon_QNP_2500 DMSO (C <sub>10</sub> ) fbriones 20        |
| Date Stamp                                      | 23 Feb 2015 21:48:32 | File Name              | C:\Users\kmmw459\Desktop\OL-NMR\Table 3\17e-d2\6\data\111r |
| Frequency (MHz)                                 | 100.62               | Nucleus                | <sup>13</sup> C                                            |
| Original Points Count                           | 32768                | Owner                  | usbodlab                                                   |
| Receiver Gain                                   | 9195.20              | SW(cyclical) (Hz)      | 23980.81                                                   |
| Spectrum Type                                   | STANDARD             | Sweep Width (Hz)       | 23980.08                                                   |
|                                                 |                      | Solvent                | DMSO-d <sub>6</sub>                                        |
|                                                 |                      | Temperature (degree C) | 28.460                                                     |
|                                                 |                      | Origin                 | spect                                                      |
|                                                 |                      | Pulse Sequence         | zgpg30                                                     |
|                                                 |                      | Spectrum Offset (Hz)   | 10012.0518                                                 |

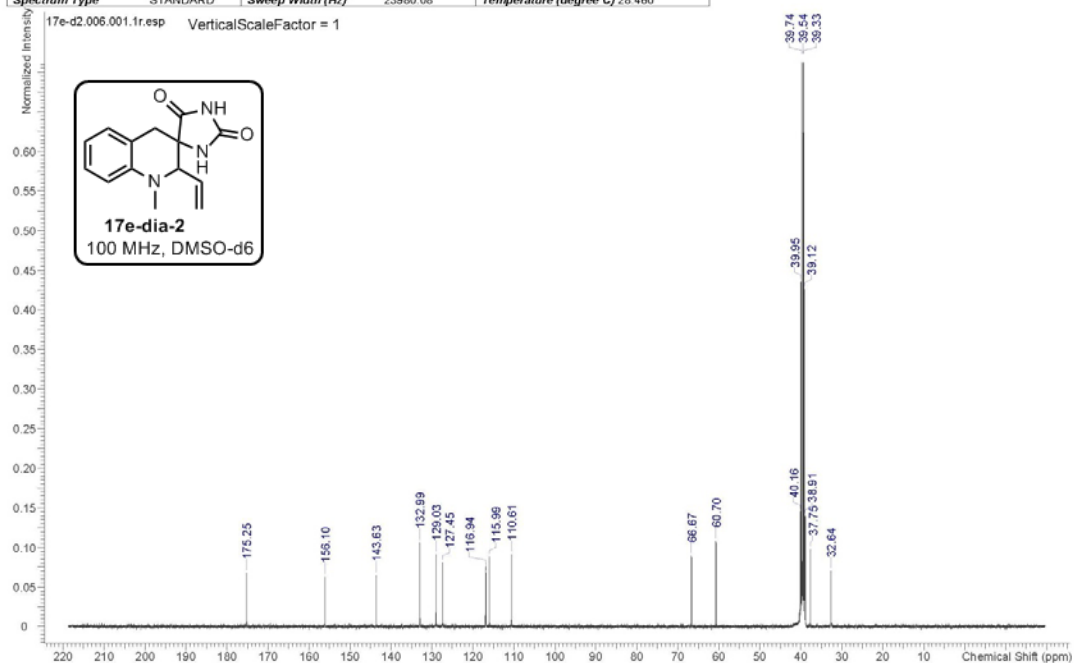

| OriginalDateForRelativeTime 2014-07-11T13:55:12 |                      | Multiplets Integrals Sum 0.00 |                                                               | Number of Nuclei 0 H's |                      |
|-------------------------------------------------|----------------------|-------------------------------|---------------------------------------------------------------|------------------------|----------------------|
| Acquisition Time (sec)                          | 0.9961               | Comment                       | proton_longdelay_QNP_16 DMSO (C <sub>10</sub> ) fbriones 5    | Date                   | 11 Jul 2014 13:55:12 |
| Date Stamp                                      | 11 Jul 2014 13:55:12 | File Name                     | C:\Users\kmmw459\Desktop\OL-NMR\EN07375-98B-SPIRO\1\data\111r | Origin                 | spect                |
| Frequency (MHz)                                 | 400.13               | Nucleus                       | <sup>1</sup> H                                                | Points Count           | 32768                |
| Original Points Count                           | 8192                 | Owner                         | usbodlab                                                      | Solvent                | DMSO-d <sub>6</sub>  |
| Receiver Gain                                   | 128.00               | SW(cyclical) (Hz)             | 8223.68                                                       | Spectrum Offset (Hz)   | 2471.0088            |
| Spectrum Type                                   | STANDARD             | Sweep Width (Hz)              | 8223.43                                                       | Temperature (degree C) | 27.060               |

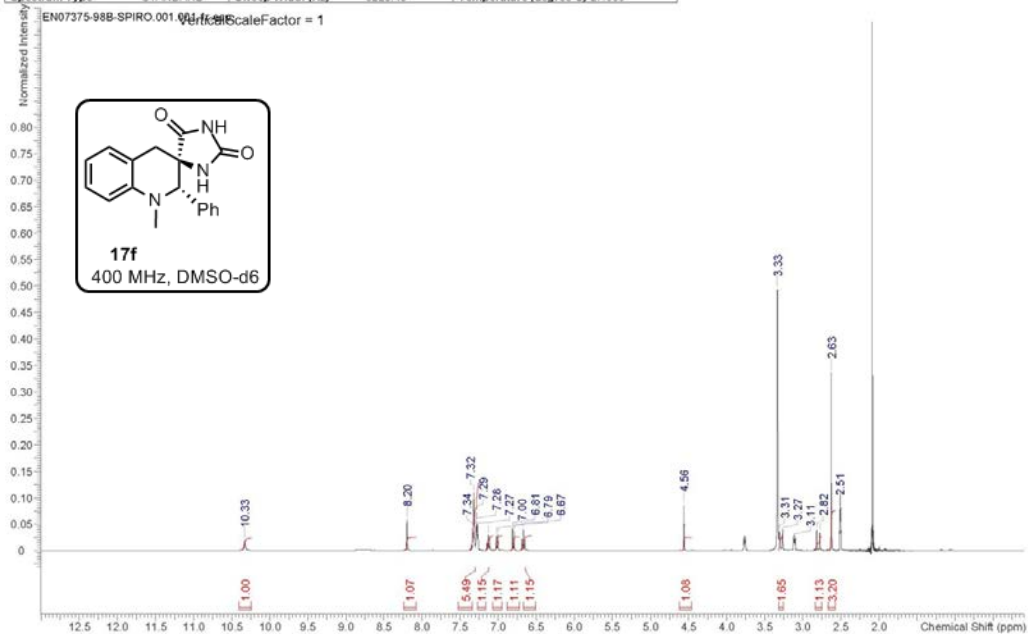

| OriginalDateForRelativeTime 2014-07-12T12:34:08 |                      | Number of Nuclei 0 C's |                                                              |                        |                      |
|-------------------------------------------------|----------------------|------------------------|--------------------------------------------------------------|------------------------|----------------------|
| Acquisition Time (sec)                          | 1.3664               | Comment                | carbon_0NP_8000 DMSO (C:u) fbriones 5                        | Date                   | 12 Jul 2014 12:34:08 |
| Date Stamp                                      | 12 Jul 2014 12:34:08 | File Name              | C:\Users\kme459\Desktop\OL-NMR\EN07375-98B-SPIRO\2\data\1\1r |                        |                      |
| Frequency (MHz)                                 | 100.62               | Nucleus                | <sup>13</sup> C                                              | Number of Transients   | 8000                 |
| Original Points Count                           | 32768                | Owner                  | usbodlab                                                     | Points Count           | 32768                |
| Receiver Gain                                   | 14596.50             | SW(cyclical) (Hz)      | 23980.81                                                     | Solvent                | DMSO-d6              |
| Spectrum Type                                   | STANDARD             | Sweep Width (Hz)       | 23980.08                                                     | Temperature (degree C) | 29.760               |
|                                                 |                      |                        |                                                              | Spectrum Offset (Hz)   | 9901.6484            |

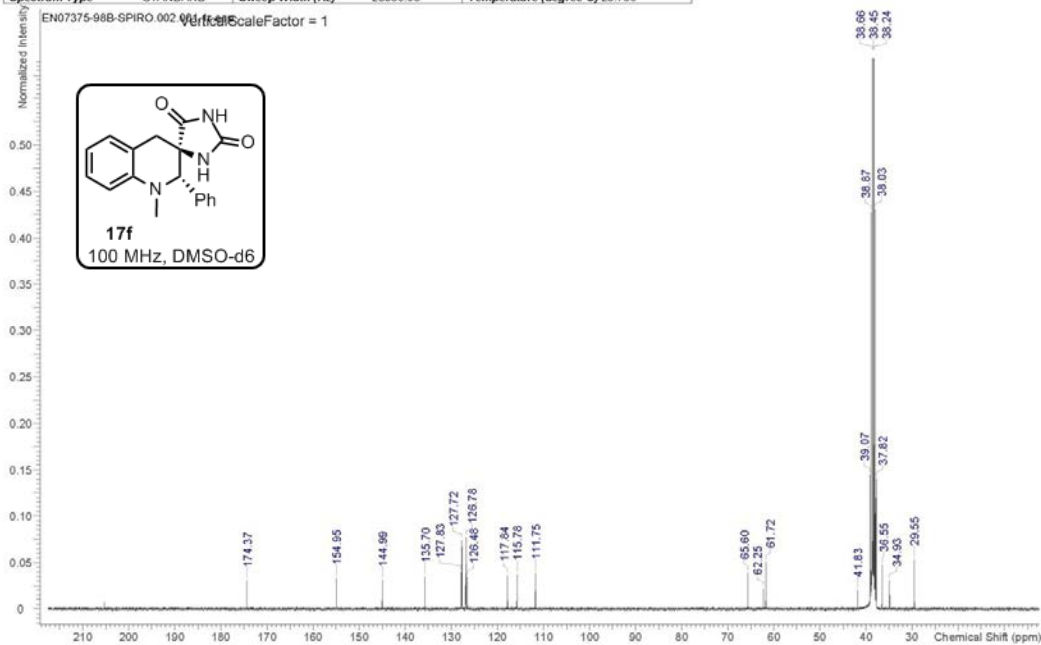

| OriginalDateForRelativeTime 2014-06-20T14:35:44 |                      | Multiplets Integrals Sum 0.00 |                                                        | Number of Nuclei 0 H's |                      |
|-------------------------------------------------|----------------------|-------------------------------|--------------------------------------------------------|------------------------|----------------------|
| Acquisition Time (sec)                          | 0.9961               | Comment                       | proton_longdelay_0NP_16 DMSO (C:u) fbriones 22         | Date                   | 20 Jun 2014 14:35:44 |
| Date Stamp                                      | 20 Jun 2014 14:35:44 | File Name                     | C:\Users\kme459\Desktop\OL-NMR\Table 3\17g\1\data\1\1r |                        |                      |
| Frequency (MHz)                                 | 400.13               | Nucleus                       | <sup>1</sup> H                                         | Number of Transients   | 16                   |
| Original Points Count                           | 8192                 | Owner                         | usbodlab                                               | Points Count           | 32768                |
| Receiver Gain                                   | 161.30               | SW(cyclical) (Hz)             | 8223.68                                                | Solvent                | DMSO-d6              |
| Spectrum Type                                   | STANDARD             | Sweep Width (Hz)              | 8223.43                                                | Temperature (degree C) | 26.960               |
|                                                 |                      |                               |                                                        | Spectrum Offset (Hz)   | 2471.0088            |

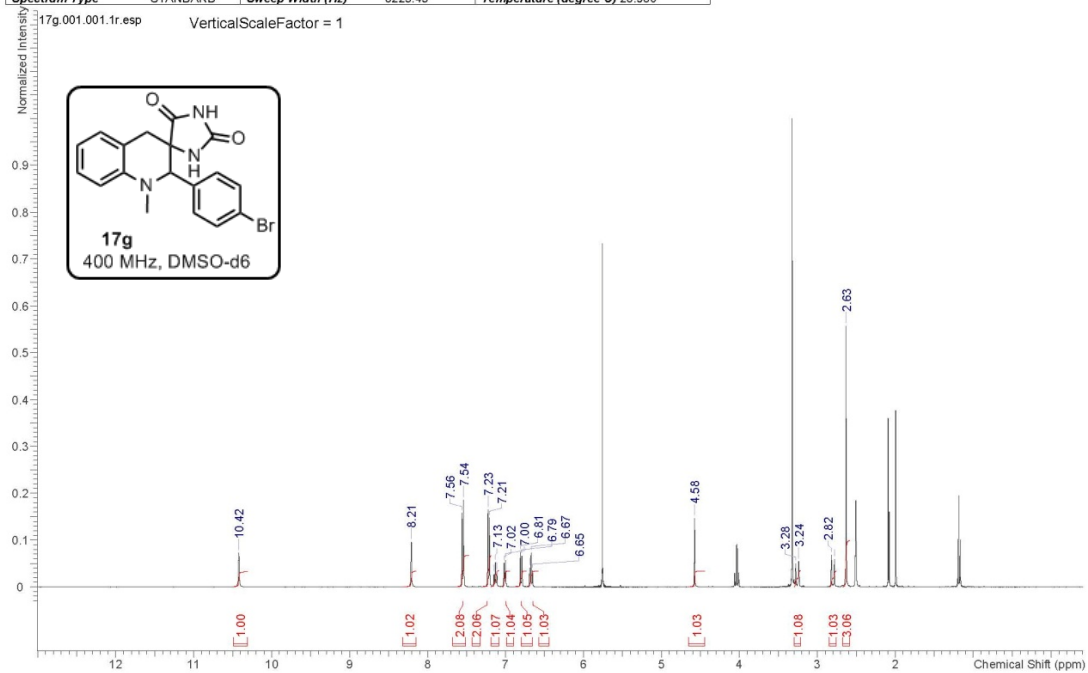

| OriginalDateForRelativeTime 2014-06-21T03:21:36 |                      | Number of Nuclei  |                                        | 0 C's                  |                                                        |
|-------------------------------------------------|----------------------|-------------------|----------------------------------------|------------------------|--------------------------------------------------------|
| Acquisition Time (sec)                          | 1.3664               | Comment           | carbon_QNP_2500 DMSO (C:u) fbriones 22 | Date                   | 21 Jun 2014 03:21:36                                   |
| Date Stamp                                      | 21 Jun 2014 03:21:36 |                   |                                        | File Name              | C:\Users\kmmk459\Desktop\OL-NMR\Table 3\17g\2\data\11r |
| Frequency (MHz)                                 | 100.62               | Nucleus           | 13C                                    | Number of Transients   | 2500                                                   |
| Original Points Count                           | 32768                | Owner             | usbodlab                               | Points Count           | 32768                                                  |
| Receiver Gain                                   | 9195.20              | SW(cyclical) (Hz) | 23980.81                               | Solvent                | DMSO-d6                                                |
| Spectrum Type                                   | STANDARD             | Sweep Width (Hz)  | 23980.08                               | Temperature (degree C) | 29.560                                                 |
|                                                 |                      |                   |                                        | Pulse Sequence         | zgpg30                                                 |
|                                                 |                      |                   |                                        | Spectrum Offset (Hz)   | 10012.0518                                             |

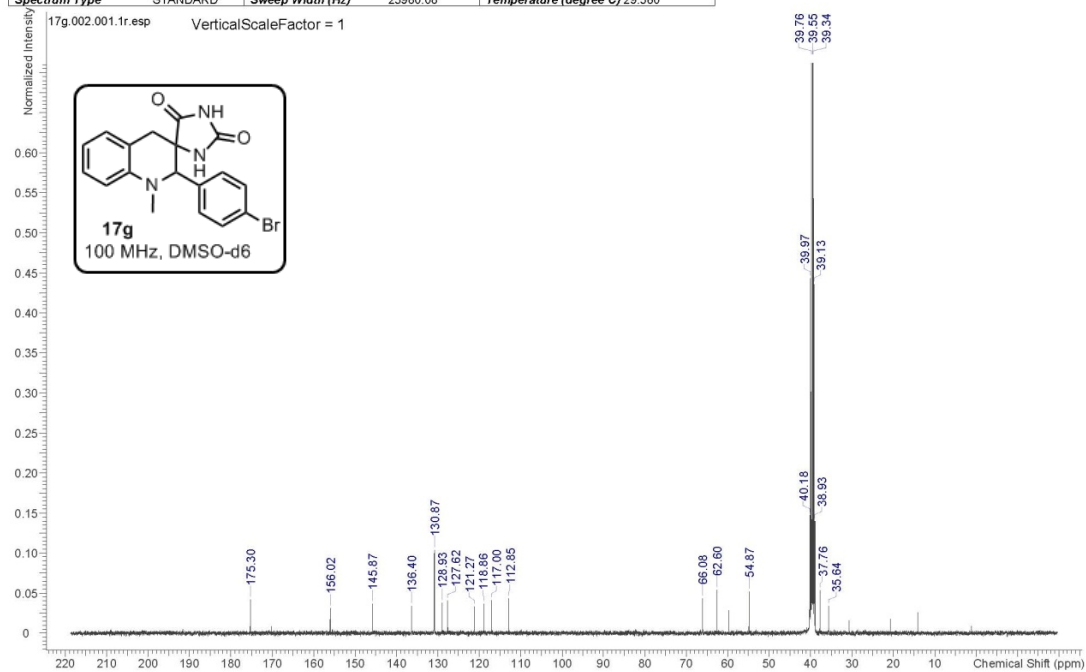

| OriginalDateForRelativeTime 2015-08-31T12:00:00 |                      | Multiplets Integrals Sum |                                                | 0.00                   |                                                                   | Number of Nuclei |  | 0 H's |  |
|-------------------------------------------------|----------------------|--------------------------|------------------------------------------------|------------------------|-------------------------------------------------------------------|------------------|--|-------|--|
| Acquisition Time (sec)                          | 3.1719               | Comment                  | PROTON DMSO (C:\Bruker\TOPSPIN1.3) fbriones 50 | Date                   | 31 Aug 2015 12:00:00                                              |                  |  |       |  |
| Date Stamp                                      | 31 Aug 2015 12:00:00 |                          |                                                | File Name              | C:\Users\kmmk459\Desktop\OL-NMR\Table 3\EN07630-21-MAJ\1\data\11r |                  |  |       |  |
| Frequency (MHz)                                 | 500.13               | Nucleus                  | 1H                                             | Number of Transients   | 32                                                                |                  |  |       |  |
| Original Points Count                           | 32768                | Owner                    | usbodlab                                       | Points Count           | 32768                                                             |                  |  |       |  |
| Receiver Gain                                   | 287.40               | SW(cyclical) (Hz)        | 10330.58                                       | Solvent                | DMSO-d6                                                           |                  |  |       |  |
| Spectrum Type                                   | STANDARD             | Sweep Width (Hz)         | 10330.26                                       | Temperature (degree C) | 27.160                                                            |                  |  |       |  |
|                                                 |                      |                          |                                                | Pulse Sequence         | zg30                                                              |                  |  |       |  |
|                                                 |                      |                          |                                                | Spectrum Offset (Hz)   | 3088.5571                                                         |                  |  |       |  |

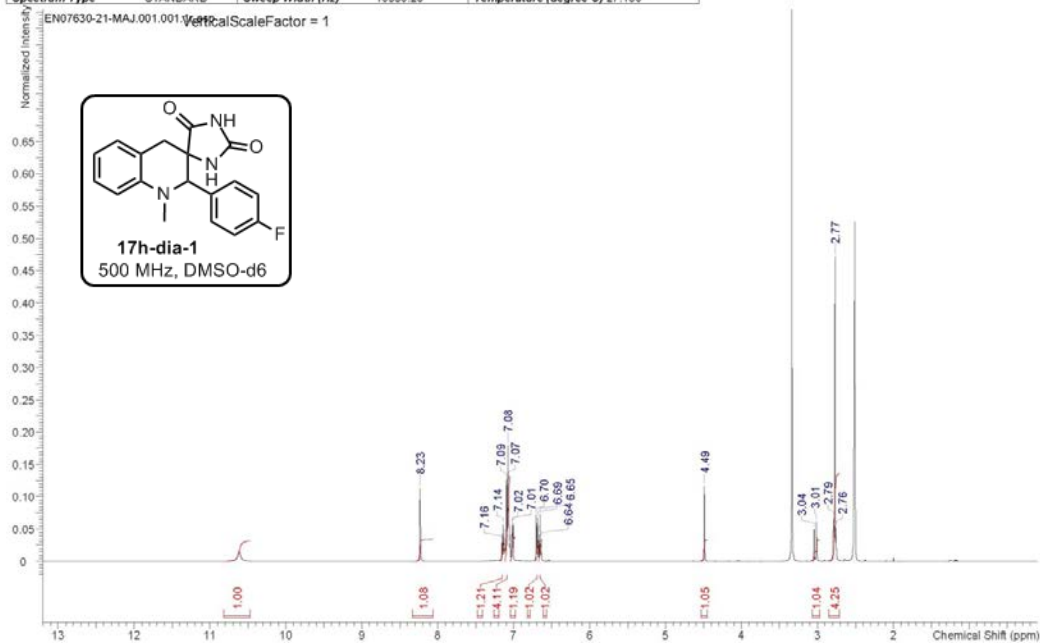

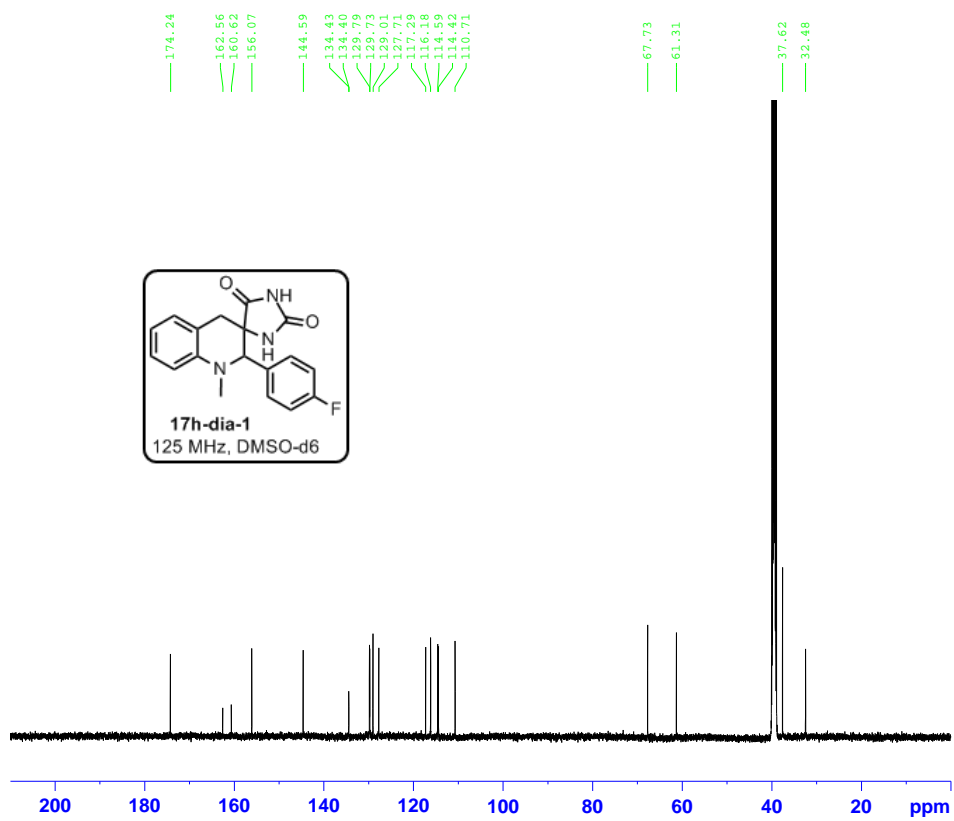

```

NAME      EN07630-21-MAJ
EXPNO     4
PROCNO    1
Date_     20150831
Time      14.03
INSTRUM   spect
PROBHD    5 mm CPQNP 1H/
PULPROG   zgpg30
TD         65418
SOLVENT   DMSO
NS         512
DS         4
SWH        30030.029 Hz
FIDRES     0.459048 Hz
AQ         1.0892597 sec
RG         2896.3
DW         16.650 usec
DE         35.00 usec
TE         300.2 K
D1         2.00000000 sec
d11        0.03000000 sec
DELTA     1.89999998 sec
TD0        1

===== CHANNEL f1 =====
NUC1       13C
P1         12.00 usec
PL1        2.20 dB
SFO1       125.7703643 MHz

===== CHANNEL f2 =====
CPDPRG2   waltz16
NUC2       1H
PCPD2      80.00 usec
PL2        1.20 dB
PL12       15.74 dB
PL13       15.89 dB
SFO2       500.1320005 MHz
SI         32768
SF         125.7578519 MHz
WDW        EM
SSB        0
LB         1.00 Hz
GB         0
PC         1.40

```

9/3/2015 2:03:21 PM

| OriginalDateForRelativeTime 2015-08-31T12:19:12 |                      | Number of Nuclei 0 F's |                                                                    |
|-------------------------------------------------|----------------------|------------------------|--------------------------------------------------------------------|
| Acquisition Time (sec)                          | 0.6554               | Comment                | F19CPD DMSO (C:\Bruker\TOPSPIN1.3)\fbriones 50                     |
| Date Stamp                                      | 31 Aug 2015 12:19:12 | Date                   | 31 Aug 2015 12:19:12                                               |
| Frequency (MHz)                                 | 470.59               | File Name              | C:\Users\kwmk459\Desktop\OL-NMR\Table 3\EN07630-21-MAJ\2\data\1\1r |
| Original Points Count                           | 65536                | Nucleus                | 19F                                                                |
| Receiver Gain                                   | 4096.00              | Number of Transients   | 8                                                                  |
| Spectrum Type                                   | STANDARD             | Owner                  | usbodlab                                                           |
|                                                 |                      | Points Count           | 65536                                                              |
|                                                 |                      | Solvent                | DMSO-d6                                                            |
|                                                 |                      | Sweep Width (Hz)       | 99998.48                                                           |
|                                                 |                      | Temperature (degree C) | 27.160                                                             |
|                                                 |                      | Pulse Sequence         | zgfhgqn                                                            |
|                                                 |                      | Spectrum Offset (Hz)   | 0.0164                                                             |

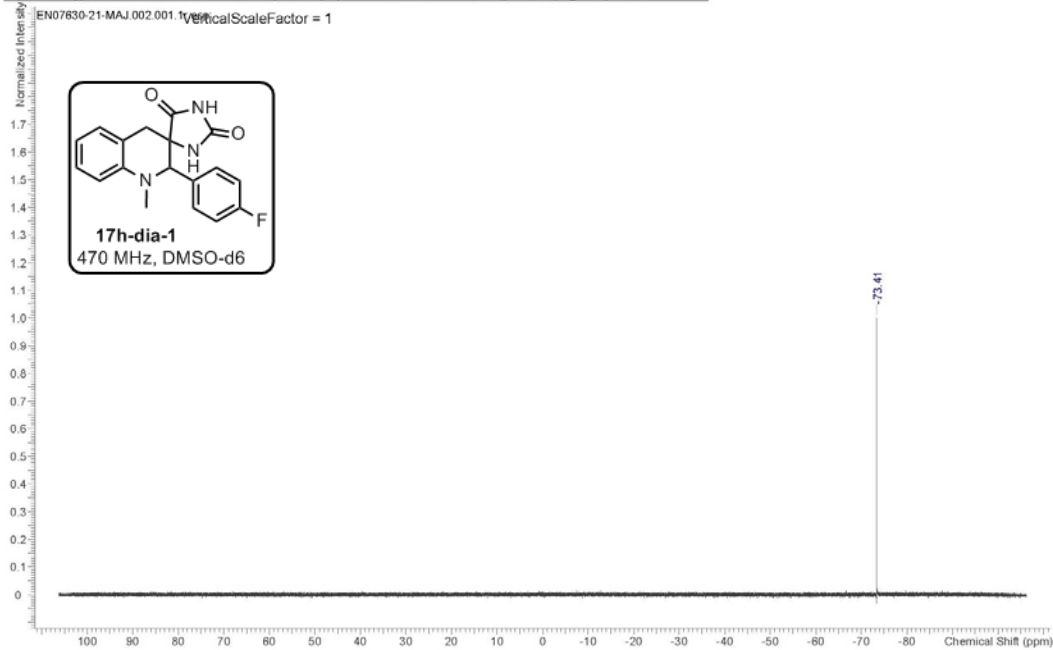

|                             |                      |                          |                                                                      |                        |                      |
|-----------------------------|----------------------|--------------------------|----------------------------------------------------------------------|------------------------|----------------------|
| OriginalDateForRelativeTime | 2015-08-31T12:08:32  | Multiplies Integrals Sum | 0.00                                                                 | Number of Nuclei       | 0 H's                |
| Acquisition Time (sec)      | 3.1719               | Comment                  | PROTON DMSO (C:\Bruker\TOPSPIN1.3) fbriones 51                       | Date                   | 31 Aug 2015 12:08:32 |
| Date Stamp                  | 31 Aug 2015 12:08:32 | File Name                | C:\Users\kmmk459\Desktop\OL-NMR\Table 3\EN07630-21-MIN\1\update\1\1r |                        |                      |
| Frequency (MHz)             | 500.13               | Nucleus                  | 1H                                                                   | Number of Transients   | 32                   |
| Original Points Count       | 32768                | Owner                    | usbodlab                                                             | Points Count           | 32768                |
| Receiver Gain               | 143.70               | SW(cyclical) (Hz)        | 10330.58                                                             | Solvent                | DMSO-d6              |
| Spectrum Type               | STANDARD             | Sweep Width (Hz)         | 10330.26                                                             | Temperature (degree C) | 27.160               |
|                             |                      |                          |                                                                      | Pulse Sequence         | zg30                 |
|                             |                      |                          |                                                                      | Spectrum Offset (Hz)   | 3152.1794            |

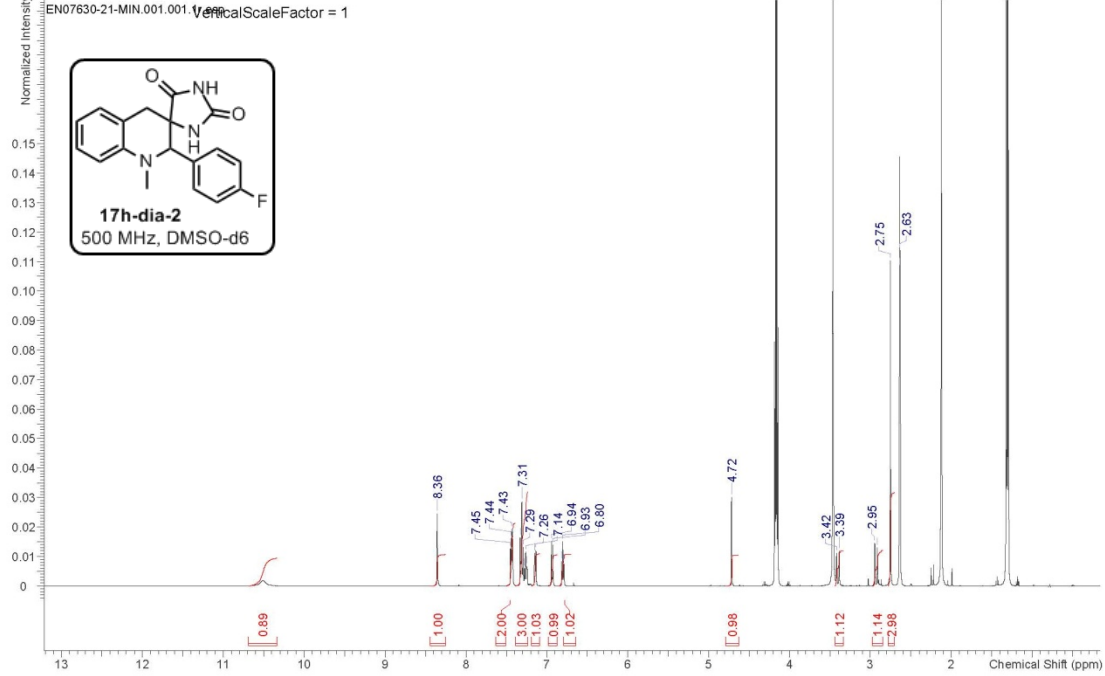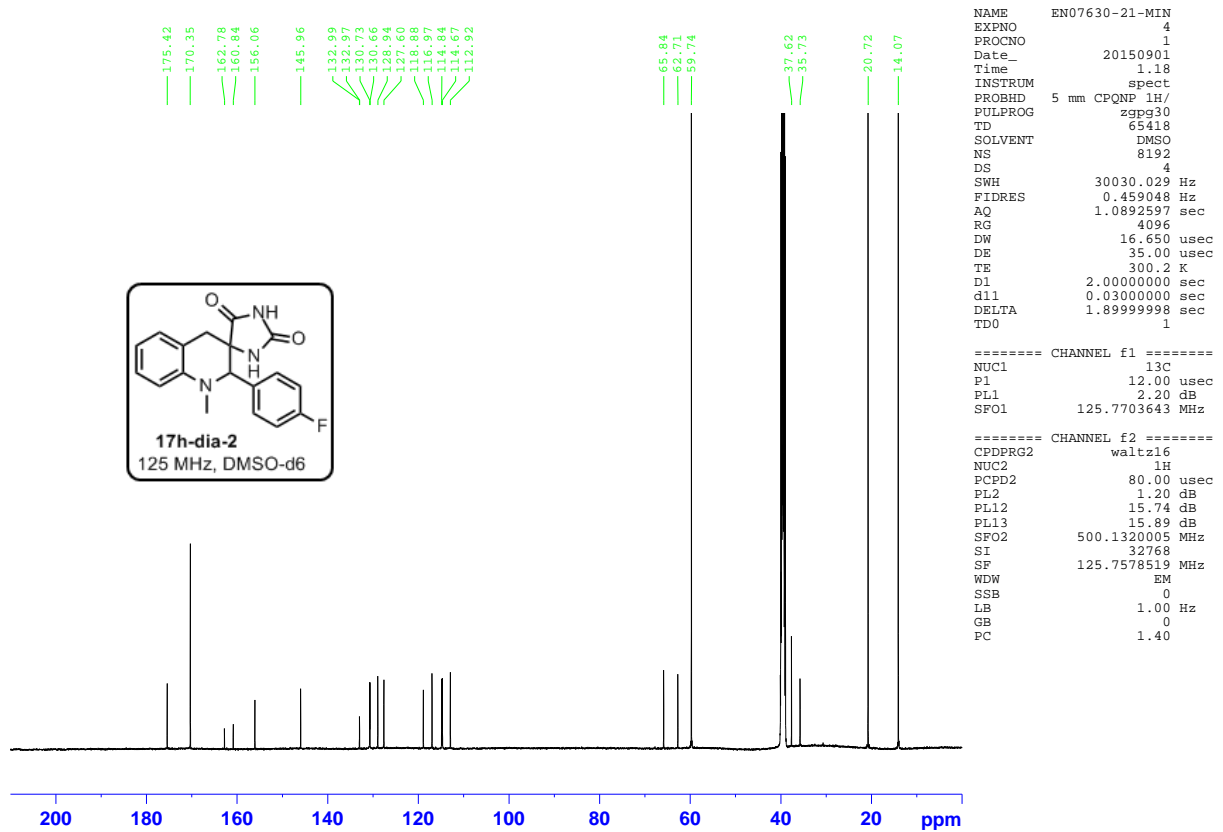

| OriginalDateForRelativeTime 2015-08-31T12:25:36 |                      | Number of Nuclei  |                                                                   | 0 F's                  |                      |
|-------------------------------------------------|----------------------|-------------------|-------------------------------------------------------------------|------------------------|----------------------|
| Acquisition Time (sec)                          | 0.6554               | Comment           | F19CPD DMSO [C:\Bruker\TOPSPIN1.3] fbriones 51                    | Date                   | 31 Aug 2015 12:25:36 |
| Date Stamp                                      | 31 Aug 2015 12:25:36 | File Name         | C:\Users\kwmk459\Desktop\OL-NMR\Table 3\EN07630-21-MIN2\pdata1\1r | Origin                 | spect                |
| Frequency (MHz)                                 | 470.59               | Nucleus           | 19F                                                               | Points Count           | 85536                |
| Original Points Count                           | 85536                | Owner             | usbodlab                                                          | Solvent                | DMSO-d6              |
| Receiver Gain                                   | 7298.20              | SW(cyclical) (Hz) | 100000.00                                                         | Temperature (degree C) | 27.160               |
| Spectrum Type                                   | STANDARD             | Sweep Width (Hz)  | 99998.48                                                          | Pulse Sequence         | zgthighn             |
|                                                 |                      |                   |                                                                   | Spectrum Offset (Hz)   | 0.0164               |

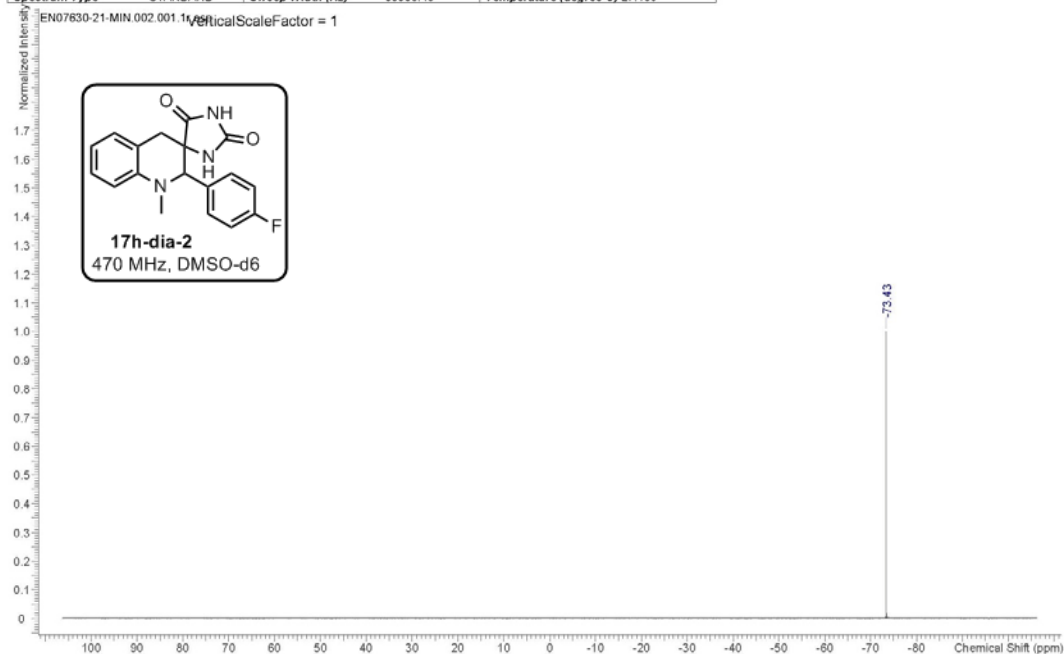

| OriginalDateForRelativeTime 2015-08-24T11:06:40 |                      | Multiplets Integrals Sum |                                                             | 0.00                   |                      | Number of Nuclei |  | 0 H's |  |
|-------------------------------------------------|----------------------|--------------------------|-------------------------------------------------------------|------------------------|----------------------|------------------|--|-------|--|
| Acquisition Time (sec)                          | 3.1719               | Comment                  | PROTON DMSO [C:\Bruker\TOPSPIN1.3] fbriones 58              | Date                   | 24 Aug 2015 11:06:40 |                  |  |       |  |
| Date Stamp                                      | 24 Aug 2015 11:06:40 | File Name                | C:\Users\kwmk459\Desktop\OL-NMR\Table 3\17i-d1-H\1pdata1\1r | Origin                 | spect                |                  |  |       |  |
| Frequency (MHz)                                 | 500.13               | Nucleus                  | 1H                                                          | Points Count           | 32768                |                  |  |       |  |
| Original Points Count                           | 32768                | Owner                    | usbodlab                                                    | Solvent                | DMSO-d6              |                  |  |       |  |
| Receiver Gain                                   | 143.70               | SW(cyclical) (Hz)        | 10330.58                                                    | Temperature (degree C) | 27.160               |                  |  |       |  |
| Spectrum Type                                   | STANDARD             | Sweep Width (Hz)         | 10330.26                                                    | Pulse Sequence         | zg30                 |                  |  |       |  |
|                                                 |                      |                          |                                                             | Spectrum Offset (Hz)   | 3188.8694            |                  |  |       |  |

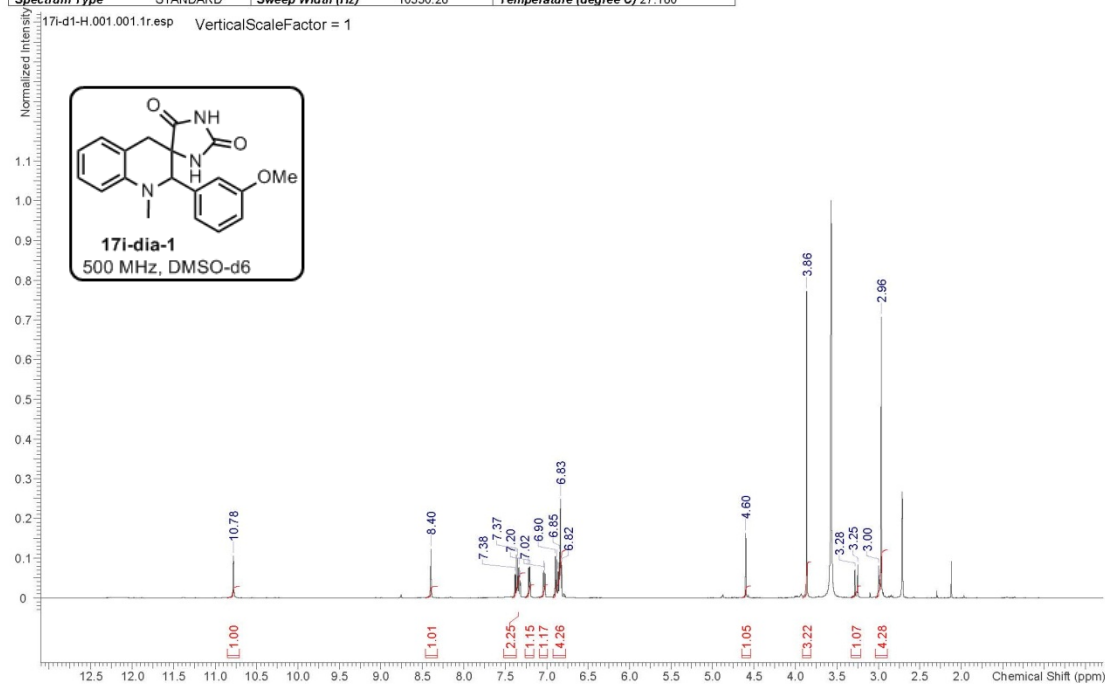



| OriginalDateForRelativeTime 2014-05-29T21:48:48 |                      | Number of Nuclei  |                                                             | 0 C's                  |                      |
|-------------------------------------------------|----------------------|-------------------|-------------------------------------------------------------|------------------------|----------------------|
| Acquisition Time (sec)                          | 1.3664               | Comment           | carbon_QNP_2500 DMSO (C-13) fbriones 33                     | Date                   | 29 May 2014 21:48:48 |
| Date Stamp                                      | 29 May 2014 21:48:48 | File Name         | C:\Users\kmmw459\Desktop\OL-NMR\Table 3\17i-d1\2\pdata\1\1r | Origin                 | spect                |
| Frequency (MHz)                                 | 100.62               | Nucleus           | <sup>13</sup> C                                             | Number of Transients   | 2500                 |
| Original Points Count                           | 32768                | Owner             | usbodlab                                                    | Points Count           | 32768                |
| Receiver Gain                                   | 11585.20             | SW(cyclical) (Hz) | 23980.81                                                    | Solvent                | DMSO-d6              |
| Spectrum Type                                   | STANDARD             | Sweep Width (Hz)  | 23980.08                                                    | Temperature (degree C) | 29.160               |
|                                                 |                      |                   |                                                             | Pulse Sequence         | zgpg30               |
|                                                 |                      |                   |                                                             | Spectrum Offset (Hz)   | 10012.0518           |

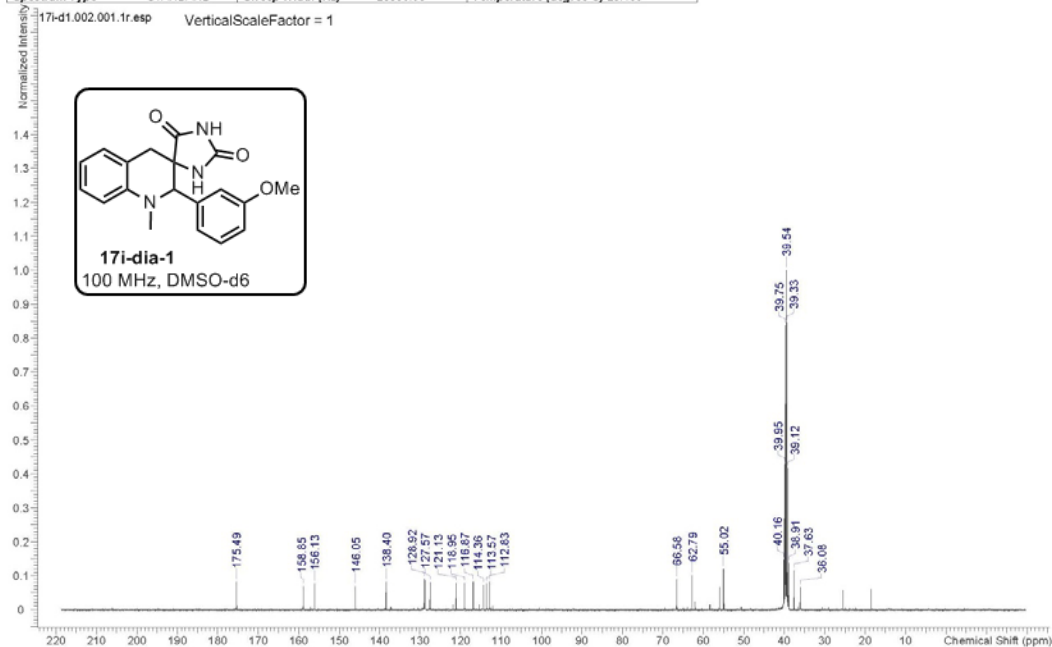

| OriginalDateForRelativeTime 2014-05-29T16:41:36 |                      | Multiplets Integrals Sum |                                                             | 0.00                   |                      | Number of Nuclei |  | 0 H's |  |
|-------------------------------------------------|----------------------|--------------------------|-------------------------------------------------------------|------------------------|----------------------|------------------|--|-------|--|
| Acquisition Time (sec)                          | 0.9961               | Comment                  | proton_QNP_128 DMSO (C-13) fbriones 37                      | Date                   | 29 May 2014 16:41:36 |                  |  |       |  |
| Date Stamp                                      | 29 May 2014 16:41:36 | File Name                | C:\Users\kmmw459\Desktop\OL-NMR\Table 3\17i-d2\1\pdata\1\1r | Origin                 | spect                |                  |  |       |  |
| Frequency (MHz)                                 | 400.13               | Nucleus                  | <sup>1</sup> H                                              | Number of Transients   | 128                  |                  |  |       |  |
| Original Points Count                           | 8192                 | Owner                    | usbodlab                                                    | Points Count           | 32768                |                  |  |       |  |
| Receiver Gain                                   | 40.30                | SW(cyclical) (Hz)        | 8223.68                                                     | Solvent                | DMSO-d6              |                  |  |       |  |
| Spectrum Type                                   | STANDARD             | Sweep Width (Hz)         | 8223.43                                                     | Temperature (degree C) | 26.960               |                  |  |       |  |
|                                                 |                      |                          |                                                             | Pulse Sequence         | zg30                 |                  |  |       |  |
|                                                 |                      |                          |                                                             | Spectrum Offset (Hz)   | 2471.0088            |                  |  |       |  |

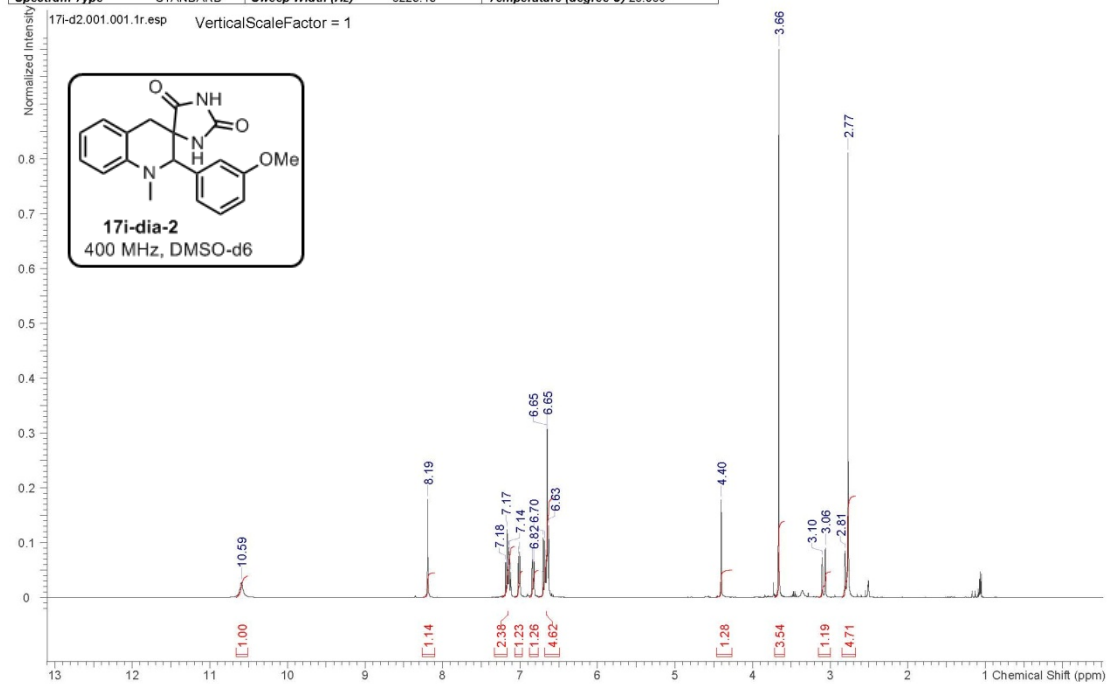

|                                                 |                                                 |                                                                     |                                 |
|-------------------------------------------------|-------------------------------------------------|---------------------------------------------------------------------|---------------------------------|
| OriginalDateForRelativeTime 2014-05-29T23:35:28 |                                                 | Number of Nuclei 0 C's                                              |                                 |
| Acquisition Time (sec) 1.3864                   | Comment carbon_QNP_2500 DMSO (C.u) fibriones 37 | Date 29 May 2014 23:35:28                                           |                                 |
| Date Stamp 29 May 2014 23:35:28                 |                                                 | File Name C:\Users\kmmw459\Desktop\OL-NMRTable 3\17i-d2\p\data\111r |                                 |
| Frequency (MHz) 100.62                          | Nucleus 13C                                     | Number of Transients 2500                                           | Origin spect                    |
| Original Points Count 32768                     | Owner usbodlab                                  | Points Count 32768                                                  | Pulse Sequence zgpg30           |
| Receiver Gain 9195.20                           | SW(cyclical) (Hz) 23980.81                      | Solvent DMSO-d6                                                     | Spectrum Offset (Hz) 10012.0518 |
| Spectrum Type STANDARD                          | Sweep Width (Hz) 23980.08                       | Temperature (degree C) 28.960                                       |                                 |

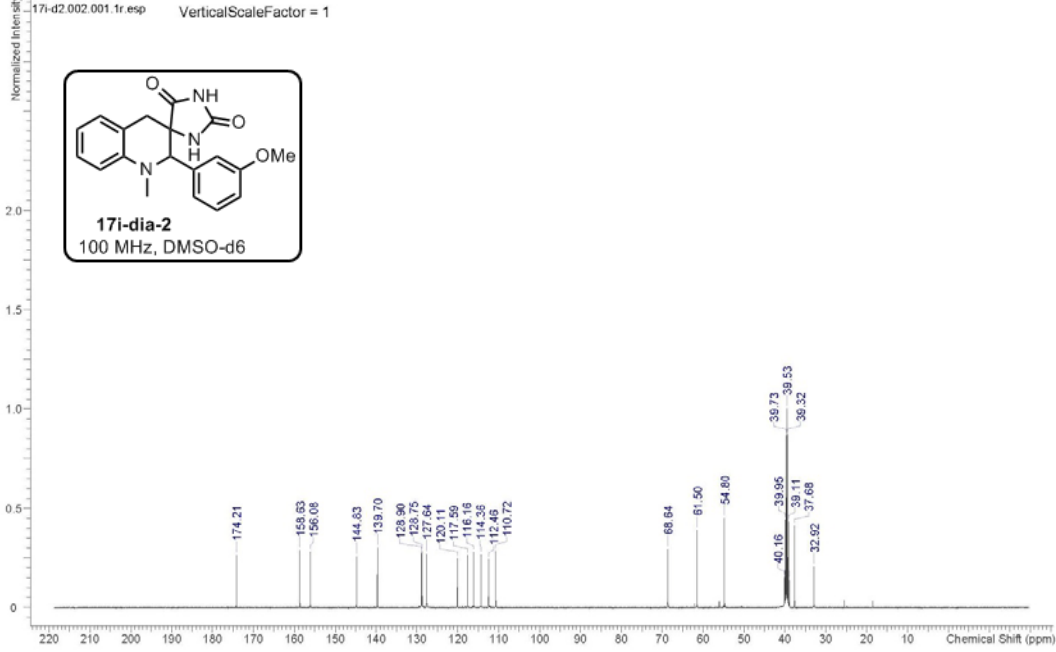

|                                                 |                                                         |                                                                                    |                                |                        |  |
|-------------------------------------------------|---------------------------------------------------------|------------------------------------------------------------------------------------|--------------------------------|------------------------|--|
| OriginalDateForRelativeTime 2015-08-25T11:10:56 |                                                         | Multiplets Integrals Sum 0.00                                                      |                                | Number of Nuclei 0 H's |  |
| Acquisition Time (sec) 3.1719                   | Comment PROTON DMSO (C:\Bruker\TOPSPIN1.3) fibriones 34 | Date 25 Aug 2015 11:10:56                                                          |                                |                        |  |
| Date Stamp 25 Aug 2015 11:10:56                 |                                                         | File Name C:\Users\kmmw459\Desktop\OL-NMRTable 3\EN07375-76-A-17j-d2\1\p\data\111r |                                |                        |  |
| Frequency (MHz) 500.13                          | Nucleus 1H                                              | Number of Transients 64                                                            | Origin spect                   |                        |  |
| Original Points Count 32768                     | Owner usbodlab                                          | Points Count 32768                                                                 | Pulse Sequence zg30            |                        |  |
| Receiver Gain 287.40                            | SW(cyclical) (Hz) 10330.58                              | Solvent DMSO-d6                                                                    | Spectrum Offset (Hz) 3088.5571 |                        |  |
| Spectrum Type STANDARD                          | Sweep Width (Hz) 10330.26                               | Temperature (degree C) 27.160                                                      |                                |                        |  |

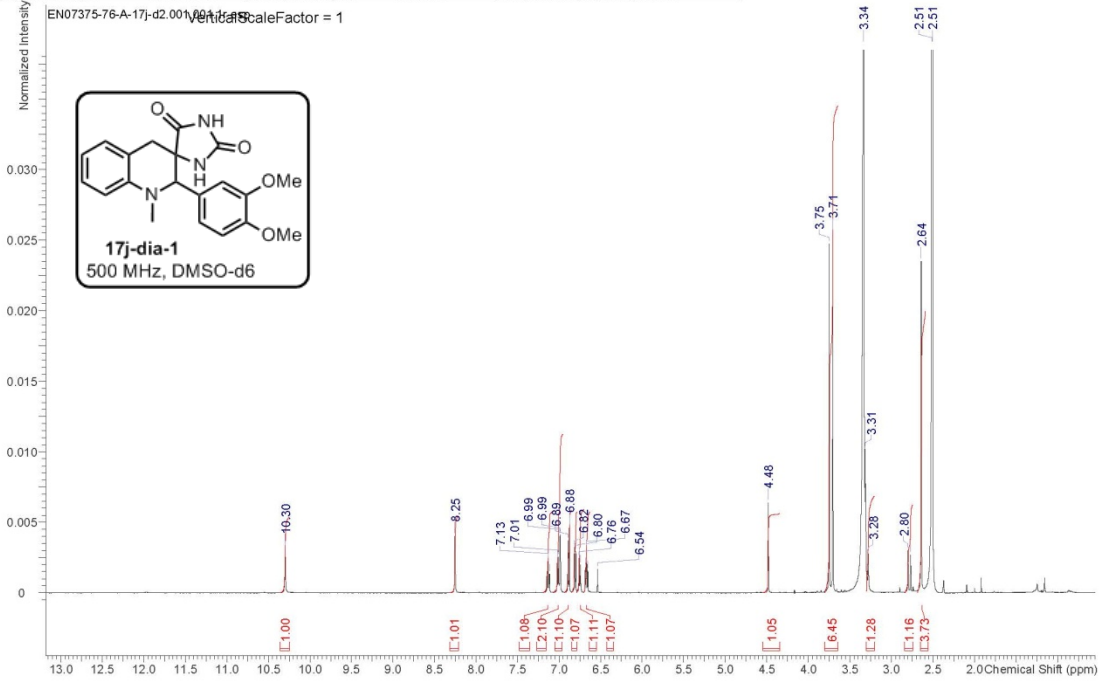

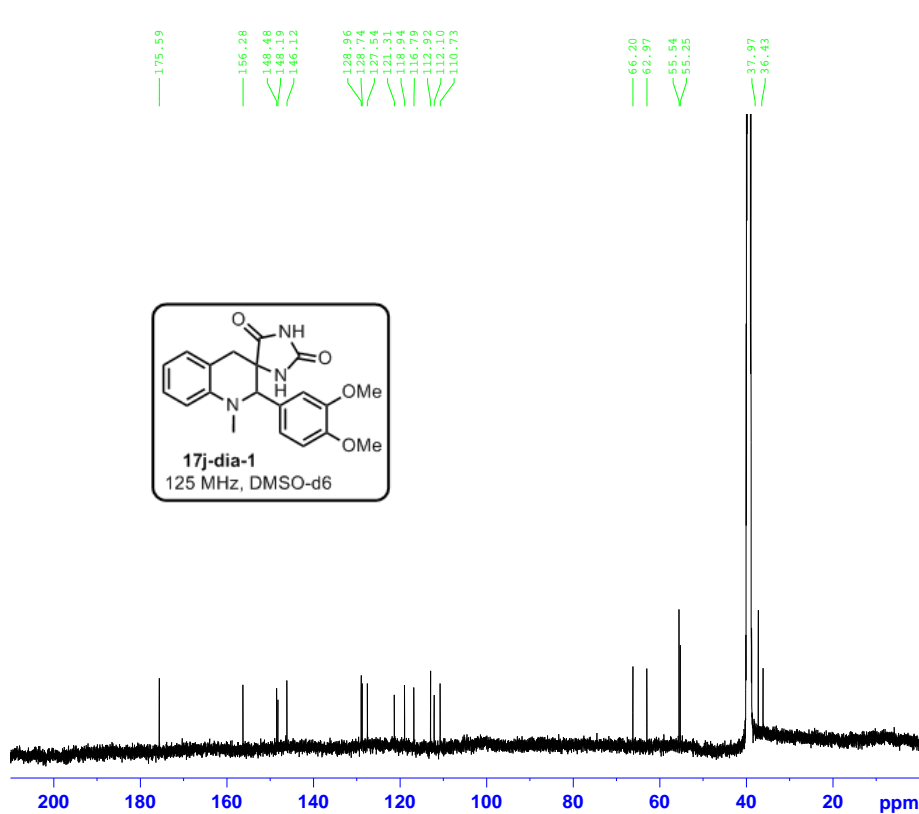

```

NAME      EN07754-17J-76A
EXPNO     3
PROCNO    1
Date_     20150904
Time      1.18
INSTRUM   spect
PROBHD    5 mm CPQNP 1H/
PULPROG   zgpg30
TD         65418
SOLVENT   DMSO
NS         8192
DS         4
SWH        30030.029 Hz
FIDRES     0.459048 Hz
AQ         1.0892597 sec
RG         2896.3
DW         16.650 usec
DE         35.00 usec
TE         300.2 K
D1         2.00000000 sec
d11        0.03000000 sec
DELTA     1.89999998 sec
TD0        1

===== CHANNEL f1 =====
NUC1       13C
P1         12.00 usec
PL1        2.20 dB
SFO1       125.7703643 MHz

===== CHANNEL f2 =====
CPDPRG2    waltz16
NUC2        1H
PCPD2       80.00 usec
PL2         1.20 dB
PL12        15.74 dB
PL13        15.89 dB
SFO2        500.1320005 MHz
SI          32768
SF          125.7578519 MHz
WDW         EM
SSB         0
LB          1.00 Hz
GB          0
PC          1.40
  
```

| OriginalDateForRelativeTime 2015-08-25T11:23:44 |                      | Multiplets Integrals Sum | 0.00                                                                   |                                 | Number of Nuclei | 0 H's                |           |
|-------------------------------------------------|----------------------|--------------------------|------------------------------------------------------------------------|---------------------------------|------------------|----------------------|-----------|
| Acquisition Time (sec)                          | 3.1719               | Comment                  | PROTON DMSO                                                            | C:\Bruker\TOPSPIN1.3\fbrioes 35 | Date             | 25 Aug 2015 11:23:44 |           |
| Date Stamp                                      | 25 Aug 2015 11:23:44 | File Name                | C:\Users\kmmw459\Desktop\OL-NMR\Table 3\EN07375-76-B-17j-d1\1\data1\1r |                                 |                  |                      |           |
| Frequency (MHz)                                 | 500.13               | Nucleus                  | 1H                                                                     | Number of Transients            | 64               | Origin               | spect     |
| Original Points Count                           | 32768                | Owner                    | usbodlab                                                               | Points Count                    | 32768            | Pulse Sequence       | zg30      |
| Receiver Gain                                   | 90.50                | SIW(cyclical) (Hz)       | 10330.58                                                               | Solvent                         | DMSO-d6          | Spectrum Offset (Hz) | 3088.5571 |
| Spectrum Type                                   | STANDARD             | Sweep Width (Hz)         | 10330.26                                                               | Temperature (degree C)          | 27.160           |                      |           |

9/3/2015 2:25:42 PM

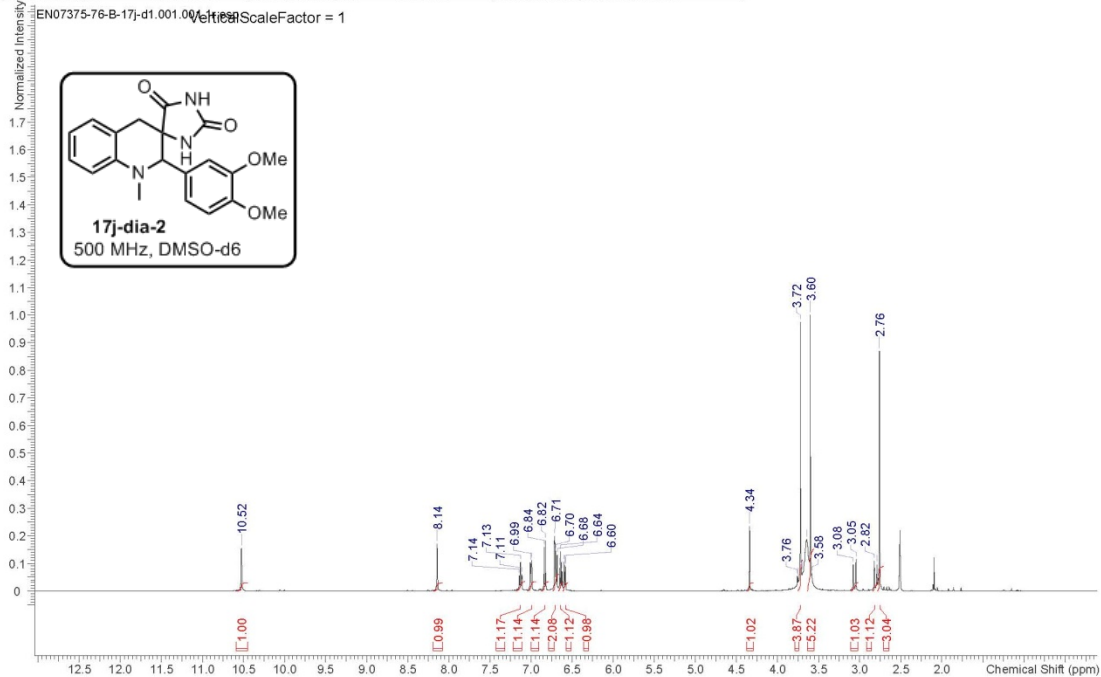

9/4/2015 11:54:04 AM

| OriginalDateForRelativeTime 2015-09-04T11:32:16 |                                                                                 | Multiplets Integrals Sum 0.00 |                                                | Number of Nuclei 0 C's |                      |
|-------------------------------------------------|---------------------------------------------------------------------------------|-------------------------------|------------------------------------------------|------------------------|----------------------|
| Acquisition Time (sec)                          | 1.0912                                                                          | Comment                       | C13CPD DMSO (C:\Bruker\TOPSPIN1.3)\fbriones 18 | Date                   | 04 Sep 2015 11:32:16 |
| Date Stamp                                      | 04 Sep 2015 11:32:16                                                            |                               |                                                |                        |                      |
| File Name                                       | Vinetapp2nmr_archive\GHP_B00_500cryo\data\friones\nmr\EN07375-76-B\3\pdata\1\1r |                               |                                                | Frequency (MHz)        | 125.77               |
| Nucleus                                         | <sup>13</sup> C                                                                 | Number of Transients          | 512                                            | Origin                 | spect                |
| Owner                                           | usbodlab                                                                        | Points Count                  | 32768                                          | Pulse Sequence         | zgpg30               |
| SW(cyclical) (Hz)                               | 30030.03                                                                        | Solvent                       | DMSO-d6                                        | Spectrum Offset (Hz)   | 12515.1611           |
| Sweep Width (Hz)                                | 30029.11                                                                        | Temperature (degree C)        | 27.160                                         | Spectrum Type          | STANDARD             |

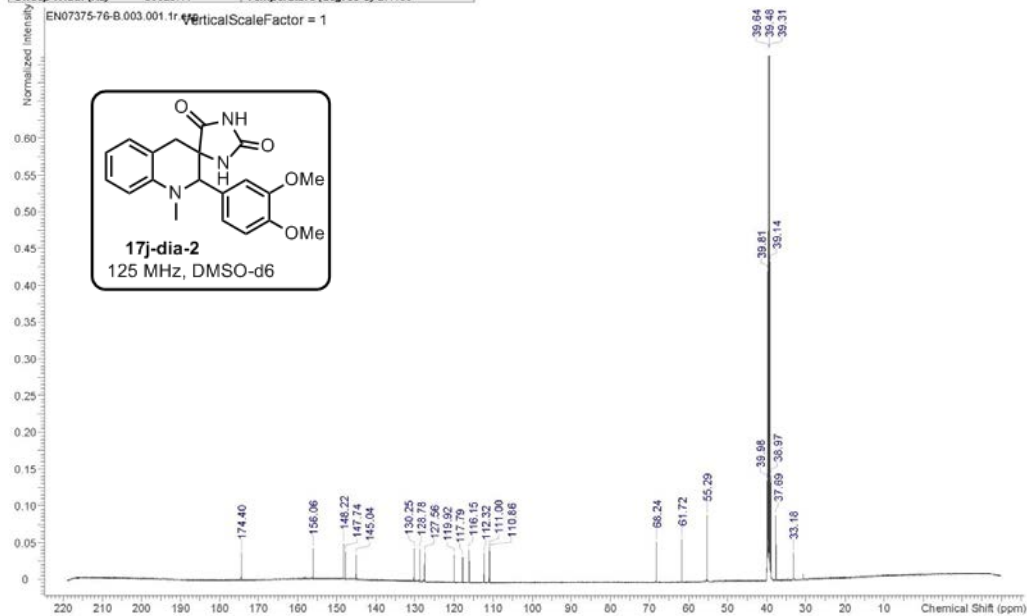

9/3/2015 4:38:09 PM

| OriginalDateForRelativeTime 2015-08-20T16:16:00 |                                                                       | Multiplets Integrals Sum 0.00 |                                               | Number of Nuclei 0 H's |                      |
|-------------------------------------------------|-----------------------------------------------------------------------|-------------------------------|-----------------------------------------------|------------------------|----------------------|
| Acquisition Time (sec)                          | 3.1719                                                                | Comment                       | PROTON DMSO (C:\Bruker\TOPSPIN1.3)\fbriones 2 | Date                   | 20 Aug 2015 16:16:00 |
| Date Stamp                                      | 20 Aug 2015 16:16:00                                                  |                               |                                               |                        |                      |
| File Name                                       | C:\Users\vmwk459\Desktop\OL-NMR\Table 3\EN07630-41-MAJOR\1\pdata\1\1r |                               |                                               | Frequency (MHz)        | 500.13               |
| Nucleus                                         | <sup>1</sup> H                                                        | Number of Transients          | 16                                            | Origin                 | spect                |
| Owner                                           | usbodlab                                                              | Points Count                  | 32768                                         | Pulse Sequence         | zg30                 |
| SW(cyclical) (Hz)                               | 10330.58                                                              | Solvent                       | DMSO-d6                                       | Spectrum Offset (Hz)   | 3088.5571            |
| Sweep Width (Hz)                                | 10330.26                                                              | Temperature (degree C)        | 27.160                                        | Spectrum Type          | STANDARD             |

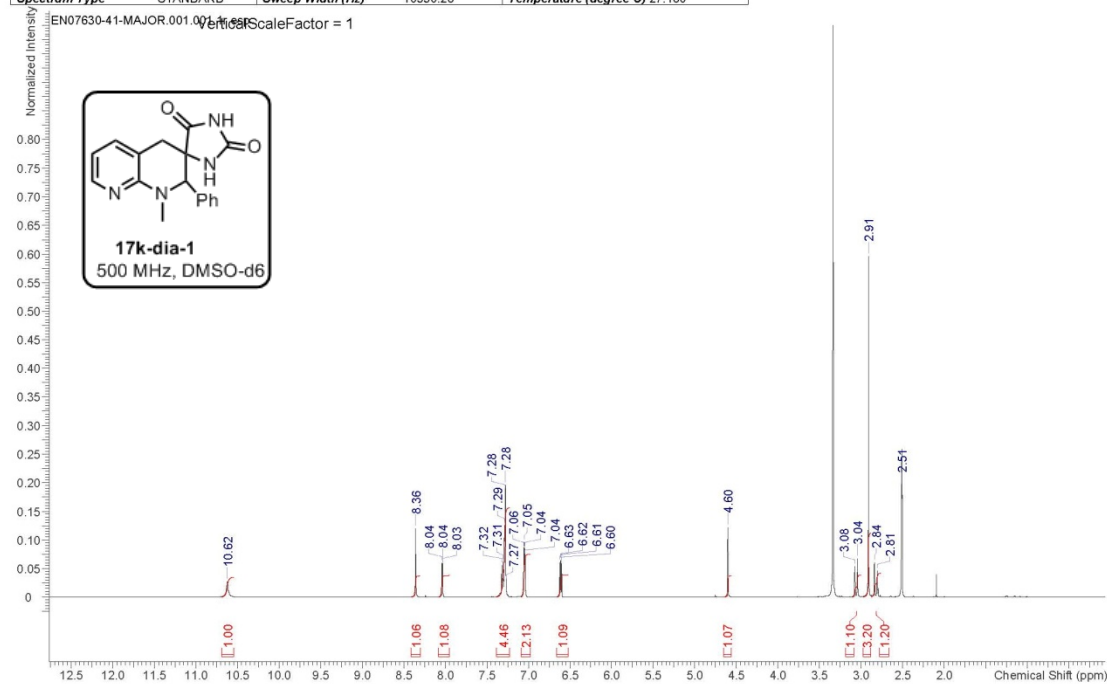

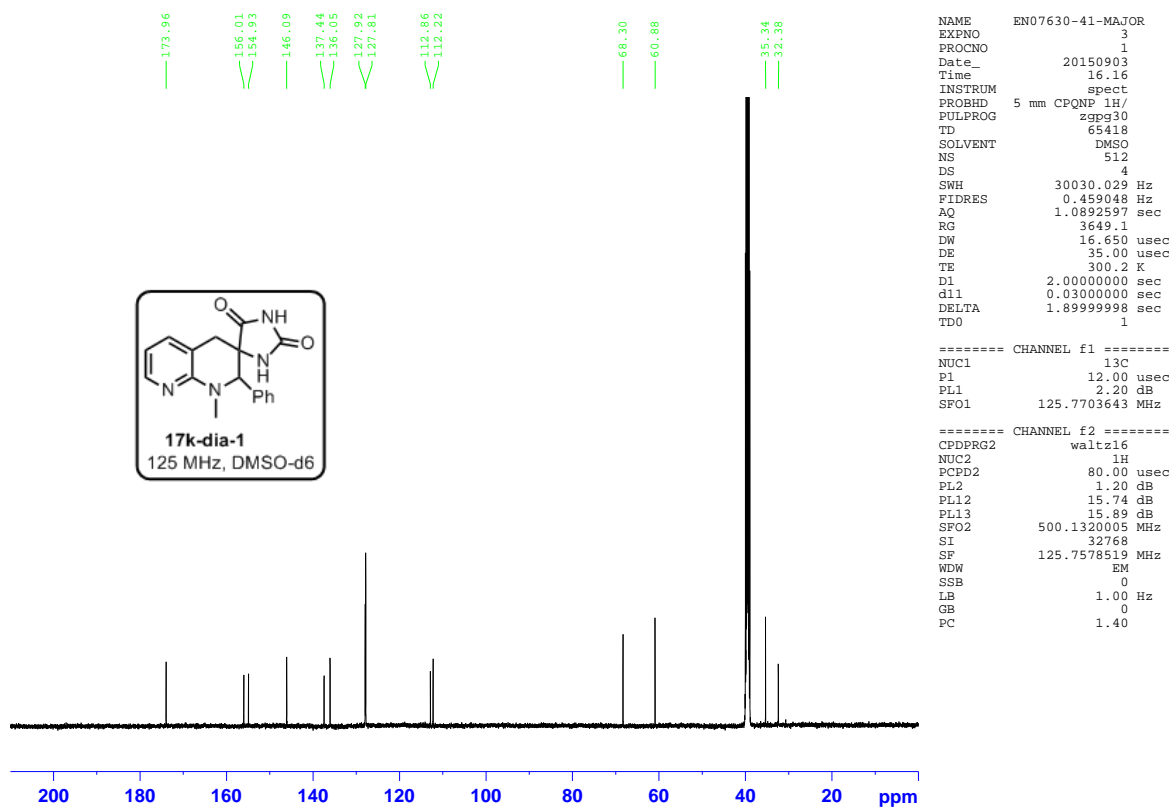

9/3/2015 4:40:48 PM

| OriginalDateForRelativeTime 2015-08-20T15:50:24 |                      | Multiplets Integrals Sum 0.00 |                                                                      | Number of Nuclei 0 H's |                      |
|-------------------------------------------------|----------------------|-------------------------------|----------------------------------------------------------------------|------------------------|----------------------|
| Acquisition Time (sec)                          | 3.1719               | Comment                       | PROTON DMSO (C:\Bruker\TOPSPIN1.3)\fbriones 1                        | Date                   | 20 Aug 2015 15:50:24 |
| Date Stamp                                      | 20 Aug 2015 15:50:24 | File Name                     | C:\Users\kmmw459\Desktop\OL-NMR\Table 3\EN07630-41-MINOR\1\data\1\1r | Origin                 | spect                |
| Frequency (MHz)                                 | 500.13               | Nucleus                       | 1H                                                                   | Number of Transients   | 16                   |
| Original Points Count                           | 32768                | Owner                         | usbodlab                                                             | Points Count           | 32768                |
| Receiver Gain                                   | 128.00               | SW(cyclical) (Hz)             | 10330.58                                                             | Solvent                | DMSO-d6              |
| Spectrum Type                                   | STANDARD             | Sweep Width (Hz)              | 10330.26                                                             | Temperature (degree C) | 27.160               |
|                                                 |                      |                               |                                                                      | Pulse Sequence         | zg30                 |
|                                                 |                      |                               |                                                                      | Spectrum Offset (Hz)   | 3088.5571            |

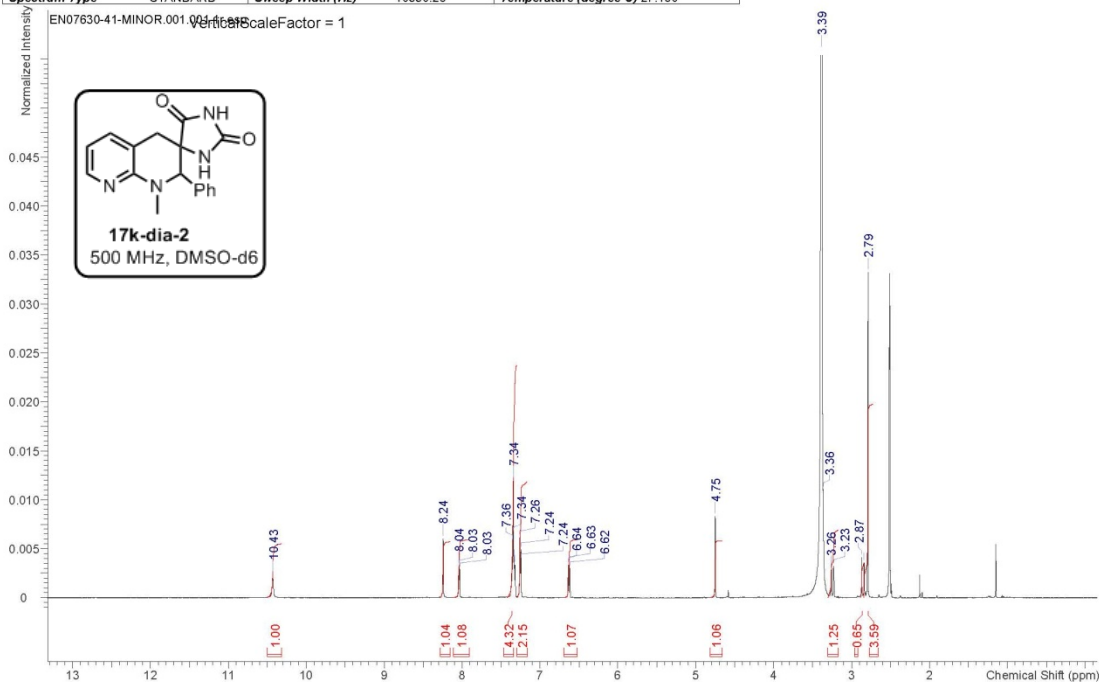

| OriginalDateForRelativeTime 2014-12-11T01:30:24 |                      | Number of Nuclei  |                                                                   | 0 C's                  |                      |
|-------------------------------------------------|----------------------|-------------------|-------------------------------------------------------------------|------------------------|----------------------|
| Acquisition Time (sec)                          | 1.3664               | Comment           | carbon_QNP_8000 DMSO (C:u) fbriones 11                            | Date                   | 11 Dec 2014 01:30:24 |
| Date Stamp                                      | 11 Dec 2014 01:30:24 | File Name         | C:\Users\kwmk459\Desktop\OL-NMR\Table 3\EN07630-41-D2\2\data\11fr | Origin                 | spect                |
| Frequency (MHz)                                 | 100.62               | Nucleus           | <sup>13</sup> C                                                   | Number of Transients   | 8000                 |
| Original Points Count                           | 32768                | Owner             | usbodlab                                                          | Points Count           | 32768                |
| Receiver Gain                                   | 18390.40             | SW(cyclical) (Hz) | 23980.81                                                          | Solvent                | DMSO-d6              |
| Spectrum Type                                   | STANDARD             | Sweep Width (Hz)  | 23980.08                                                          | Temperature (degree C) | 28.060               |
|                                                 |                      |                   |                                                                   | Spectrum Offset (Hz)   | 10012.0518           |

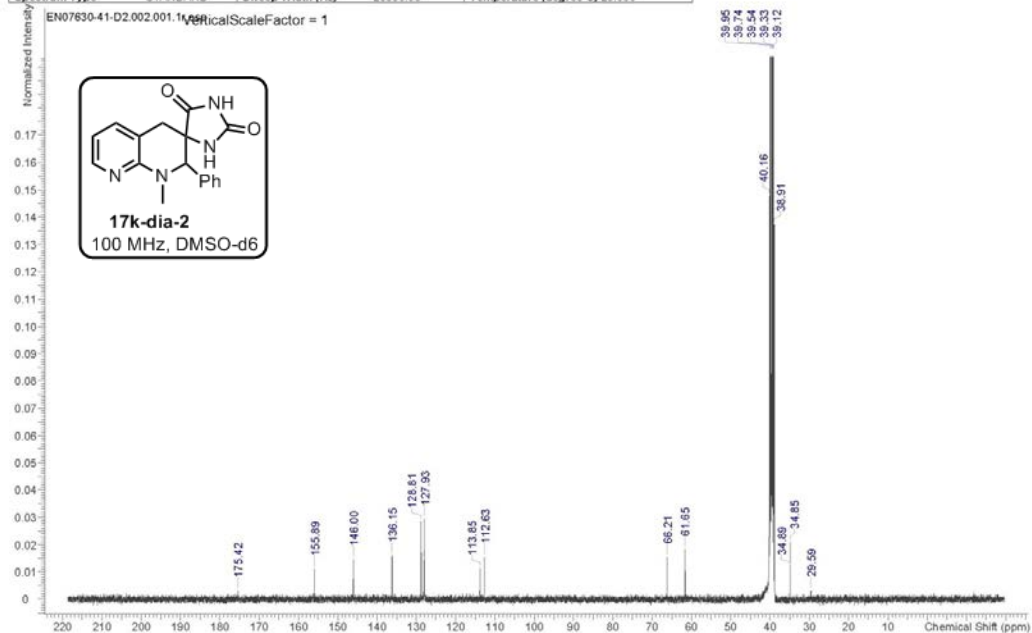

| OriginalDateForRelativeTime 2015-07-17T14:08:00 |                      | Multiplets Integrals Sum |                                                         | 0.00                  |                      | Number of Nuclei  |                                                | 0 H's           |             |
|-------------------------------------------------|----------------------|--------------------------|---------------------------------------------------------|-----------------------|----------------------|-------------------|------------------------------------------------|-----------------|-------------|
| Acquisition Time (sec)                          | 2.6542               | Comment                  | A3 300MHz proton longdelay_QNP_16 MeOD (C:u) fbriones 9 | Date                  | 17 Jul 2015 14:08:00 | File Name         | C:\Users\kwmk459\Desktop\OL-NMR\22\1\data\11fr | Frequency (MHz) | 300.13      |
| Date                                            | 17 Jul 2015 14:08:00 | Origin                   | spect                                                   | Original Points Count | 16384                | Owner             | usbodlab                                       | Points Count    | 32768       |
| Number of Transients                            | 16                   | Pulse Sequence           | zg30                                                    | Receiver Gain         | 228.10               | SW(cyclical) (Hz) | 6172.84                                        | Solvent         | METHANOL-d4 |
| Temperature (degree C)                          | 27.160               | Spectrum Offset (Hz)     | 1853.4569                                               | Spectrum Type         | STANDARD             | Sweep Width (Hz)  | 6172.65                                        |                 |             |

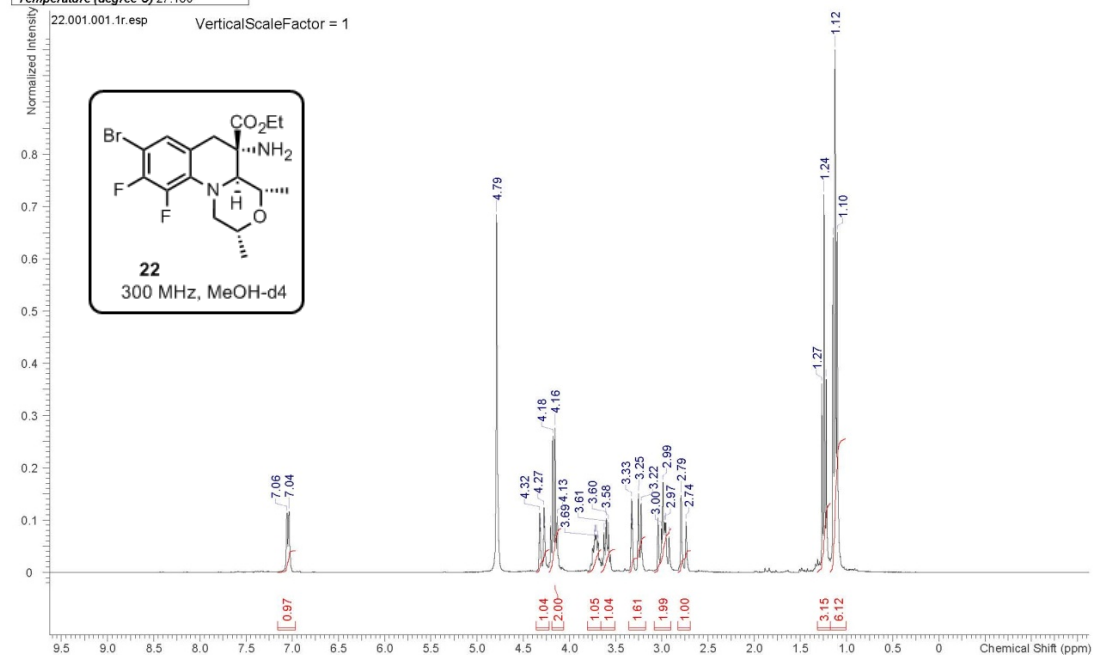

| OriginalDateForRelativeTime 2015-07-18T01:07:12 |                      | Number of Nuclei  |                                                 | 0 C's                  |                      |
|-------------------------------------------------|----------------------|-------------------|-------------------------------------------------|------------------------|----------------------|
| Acquisition Time (sec)                          | 1.8612               | Comment           | A3 300MHz carbon QNP_8000 MeOD (C:w) fbriones 9 | Date                   | 18 Jul 2015 01:07:12 |
| Date Stamp                                      | 18 Jul 2015 01:07:12 | File Name         | C:\Users\kmmw459\Desktop\OL-NMR\22\pdata\1\1r   | Origin                 | spect                |
| Frequency (MHz)                                 | 75.48                | Nucleus           | <sup>13</sup> C                                 | Number of Transients   | 8000                 |
| Original Points Count                           | 32768                | Owner             | usbodlab                                        | Points Count           | 32768                |
| Receiver Gain                                   | 2048.00              | SW(cyclical) (Hz) | 17605.63                                        | Solvent                | METHANOL-d4          |
| Spectrum Type                                   | STANDARD             | Sweep Width (Hz)  | 17605.10                                        | Temperature (degree C) | 26.960               |
|                                                 |                      |                   |                                                 | Pulse Sequence         | zgpg30               |
|                                                 |                      |                   |                                                 | Spectrum Offset (Hz)   | 7655.1299            |

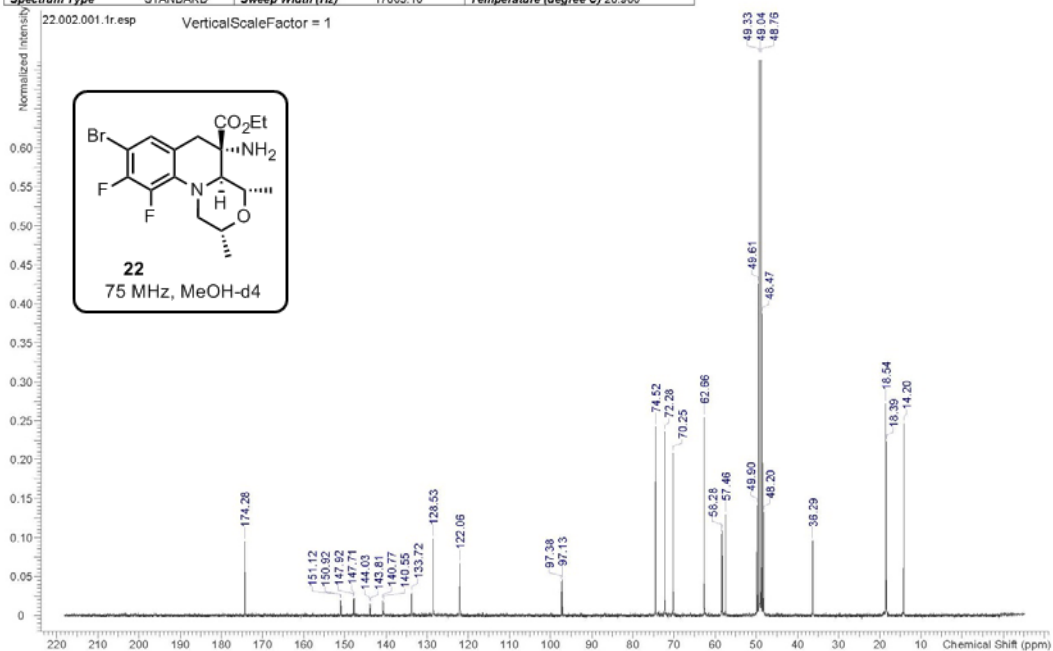

| OriginalDateForRelativeTime 2015-07-18T10:06:56 |                      | Number of Nuclei  |                                               | 0 C's                  |                      |
|-------------------------------------------------|----------------------|-------------------|-----------------------------------------------|------------------------|----------------------|
| Acquisition Time (sec)                          | 1.8219               | Comment           | A3 300MHz dept_QNP_2000 MeOD (C:w) fbriones 9 | Date                   | 18 Jul 2015 10:06:56 |
| Date Stamp                                      | 18 Jul 2015 10:06:56 | File Name         | C:\Users\kmmw459\Desktop\OL-NMR\22\pdata\1\1r | Origin                 | spect                |
| Frequency (MHz)                                 | 75.48                | Nucleus           | <sup>13</sup> C                               | Number of Transients   | 2000                 |
| Original Points Count                           | 32768                | Owner             | usbodlab                                      | Points Count           | 32768                |
| Receiver Gain                                   | 16384.00             | SW(cyclical) (Hz) | 17985.61                                      | Solvent                | METHANOL-d4          |
| Spectrum Type                                   | DEPT135              | Sweep Width (Hz)  | 17985.06                                      | Temperature (degree C) | 26.960               |
|                                                 |                      |                   |                                               | Pulse Sequence         | dept135              |
|                                                 |                      |                   |                                               | Spectrum Offset (Hz)   | 7655.1504            |

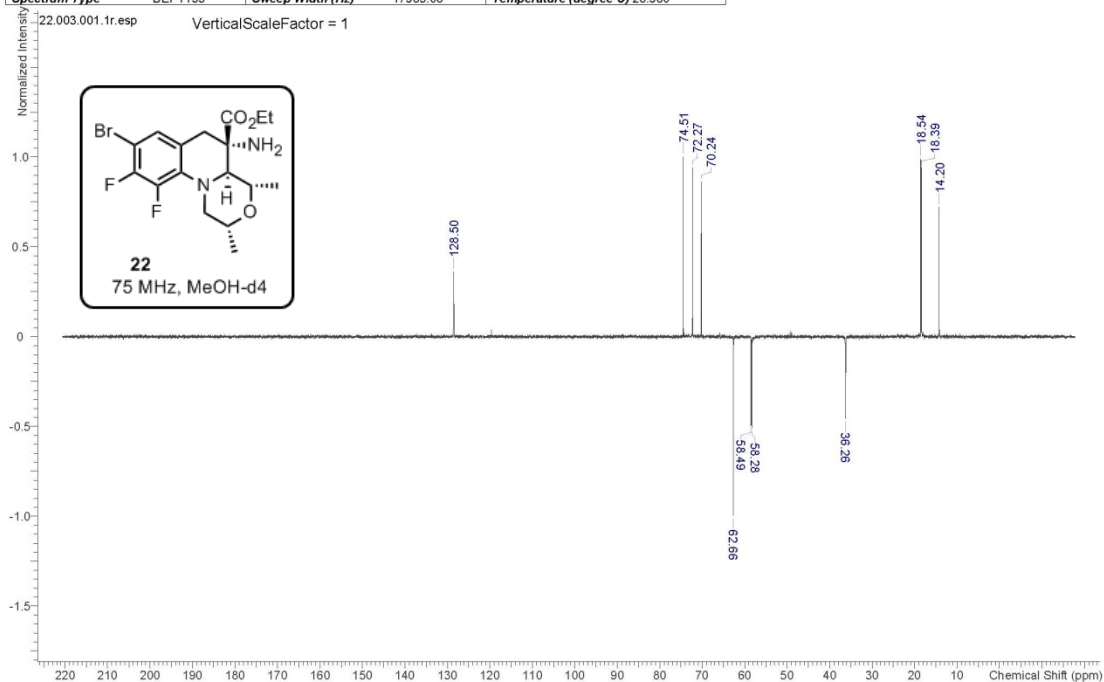

| OriginalDateForRelativeTime 2015-07-18T10:09:04 |                      | Number of Nuclei  |                                                      | 0 F's                  |                      |
|-------------------------------------------------|----------------------|-------------------|------------------------------------------------------|------------------------|----------------------|
| Acquisition Time (sec)                          | 0.8716               | Comment           | A3 300MHz fluorine_dec_QNP_64 MeOD (C:\u) fbriones 9 | Date                   | 18 Jul 2015 10:09:04 |
| Date Stamp                                      | 18 Jul 2015 10:09:04 | File Name         | C:\Users\kwwk459\Desktop\OL-NMR\22\pdata\1\1r        | Origin                 | spect                |
| Frequency (MHz)                                 | 282.38               | Nucleus           | 19F                                                  | Number of Transients   | 64                   |
| Original Points Count                           | 65536                | Owner             | usbodlab                                             | Points Count           | 65536                |
| Receiver Gain                                   | 4597.60              | SW(cyclical) (Hz) | 75187.97                                             | Solvent                | METHANOL-d4          |
| Spectrum Type                                   | STANDARD             | Sweep Width (Hz)  | 75186.82                                             | Temperature (degree C) | 26.860               |
|                                                 |                      |                   |                                                      | Pulse Sequence         | zgfhgqn              |
|                                                 |                      |                   |                                                      | Spectrum Offset (Hz)   | -19789.5508          |

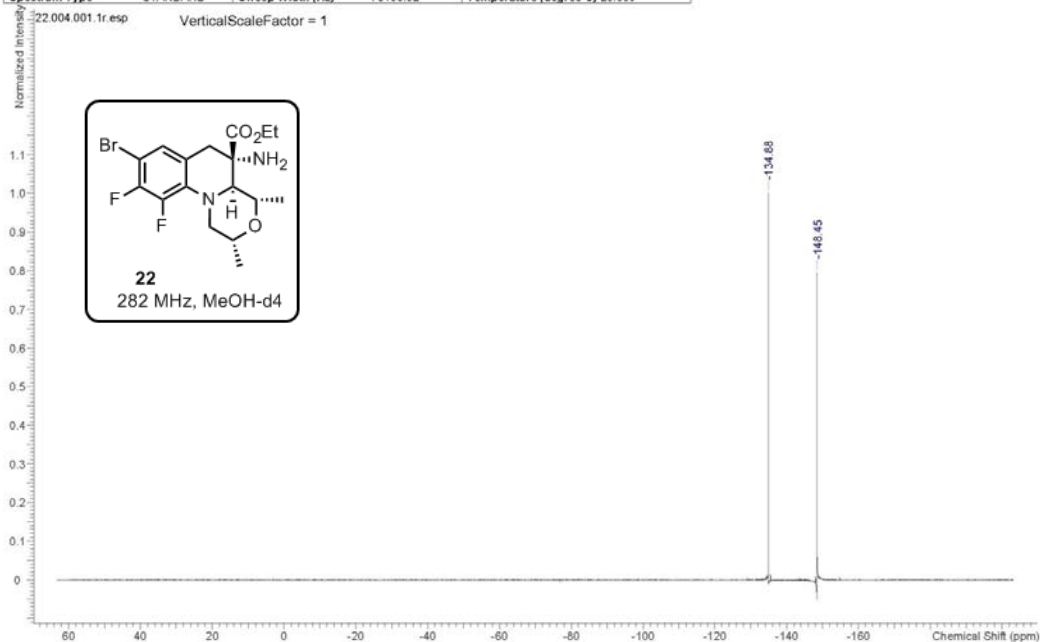

| OriginalDateForRelativeTime 2015-07-17T14:18:40 |                      | Multiplets Integrals Sum |                                                           | 0.00             |                      | Number of Nuclei       |         | 0 H's         |          |
|-------------------------------------------------|----------------------|--------------------------|-----------------------------------------------------------|------------------|----------------------|------------------------|---------|---------------|----------|
| Acquisition Time (sec)                          | 2.6542               | Comment                  | A3 300MHz proton_longdelay_QNP_16 MeOD (C:\u) fbriones 10 | Date Stamp       | 17 Jul 2015 14:18:40 | Frequency (MHz)        | 300.13  | Nucleus       | 1H       |
| Date                                            | 17 Jul 2015 14:18:40 | File Name                | C:\Users\kwwk459\Desktop\OL-NMR\22-epi-c3\1pdata\1\1r     | Origin           | spect                | Original Points Count  | 16384   | Owner         | usbodlab |
| Number of Transients                            | 16                   | Pulse Sequence           | zg30                                                      | Receiver Gain    | 228.10               | SW(cyclical) (Hz)      | 6172.84 | Spectrum Type | STANDARD |
| Points Count                                    | 32768                | Spectrum Offset (Hz)     | 1853.4569                                                 | Sweep Width (Hz) | 6172.65              | Temperature (degree C) | 27.060  |               |          |

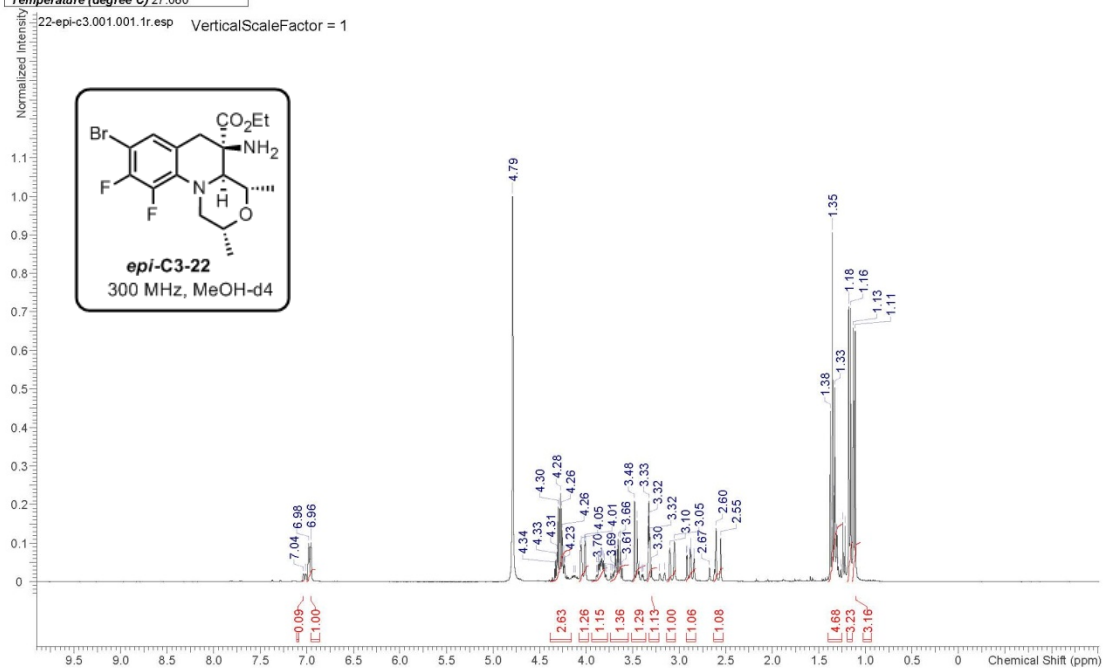



| OriginalDateForRelativeTime 2015-07-18T07:50:24 |                      | Number of Nuclei  |                                                      | 0 C's                  |                      |
|-------------------------------------------------|----------------------|-------------------|------------------------------------------------------|------------------------|----------------------|
| Acquisition Time (sec)                          | 1.8612               | Comment           | A3 300MHz carbon_QNP_8000 MeOD (C:u) fbriones 10     | Date                   | 18 Jul 2015 07:50:24 |
| Date Stamp                                      | 18 Jul 2015 07:50:24 | File Name         | C:\Users\kmmk459\Desktop\OL-NMR\2-epi-c3\3\data\1\1r |                        |                      |
| Frequency (MHz)                                 | 75.48                | Nucleus           | 13C                                                  | Number of Transients   | 8000                 |
| Original Points Count                           | 32768                | Owner             | usbodlab                                             | Points Count           | 32768                |
| Receiver Gain                                   | 3251.00              | SW(cyclical) (Hz) | 17605.63                                             | Solvent                | METHANOL-d4          |
| Spectrum Type                                   | STANDARD             | Sweep Width (Hz)  | 17605.10                                             | Temperature (degree C) | 26.960               |
|                                                 |                      |                   |                                                      | Pulse Sequence         | zgpg30               |
|                                                 |                      |                   |                                                      | Spectrum Offset (Hz)   | 7655.1299            |

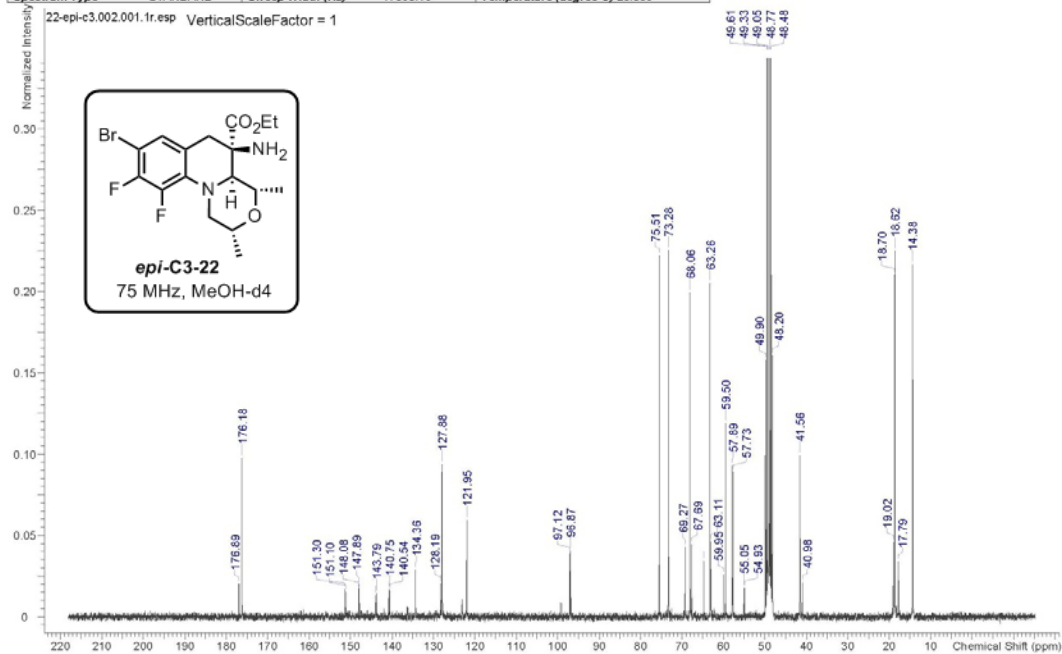

| OriginalDateForRelativeTime 2015-07-18T10:19:44 |                      | Multiplets Integrals Sum |                                                      | Number of Nuclei       |                      |
|-------------------------------------------------|----------------------|--------------------------|------------------------------------------------------|------------------------|----------------------|
| Acquisition Time (sec)                          | 0.8716               | Comment                  | A3 300MHz fluorine_dec_QNP_64 MeOD (C:u) fbriones 10 | Date                   | 18 Jul 2015 10:19:44 |
| Date Stamp                                      | 18 Jul 2015 10:19:44 | File Name                | C:\Users\kmmk459\Desktop\OL-NMR\2-epi-c3\3\data\1\1r |                        |                      |
| Frequency (MHz)                                 | 282.38               | Nucleus                  | 19F                                                  | Number of Transients   | 64                   |
| Original Points Count                           | 65536                | Owner                    | usbodlab                                             | Points Count           | 65536                |
| Receiver Gain                                   | 5792.60              | SW(cyclical) (Hz)        | 75187.97                                             | Solvent                | METHANOL-d4          |
| Spectrum Type                                   | STANDARD             | Sweep Width (Hz)         | 75186.82                                             | Temperature (degree C) | 26.960               |
|                                                 |                      |                          |                                                      | Pulse Sequence         | zgfhigqn             |
|                                                 |                      |                          |                                                      | Spectrum Offset (Hz)   | -19769.5508          |

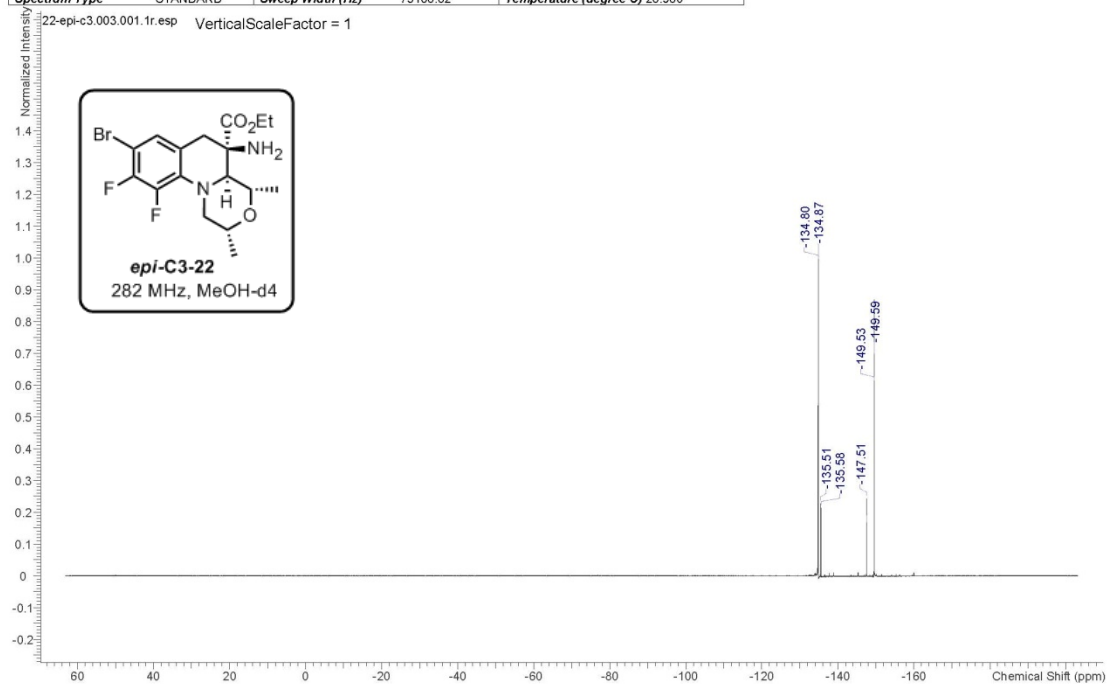

|                                                 |                      |                               |                                                |                        |                      |
|-------------------------------------------------|----------------------|-------------------------------|------------------------------------------------|------------------------|----------------------|
| OriginalDateForRelativeTime 2015-07-31T16:16:00 |                      | Multiplets Integrals Sum 0.00 |                                                | Number of Nuclei 0 H's |                      |
| Acquisition Time (sec)                          | 3.1719               | Comment                       | PROTON DMSO (C:\Bruker\TOPSPIN1.3) fbriones 30 | Date                   | 31 Jul 2015 16:16:00 |
| Date Stamp                                      | 31 Jul 2015 16:16:00 | File Name                     | C:\Users\kmmw459\Desktop\OL-NMR\23\1\data\1\1r |                        |                      |
| Frequency (MHz)                                 | 500.13               | Nucleus                       | 1H                                             | Number of Transients   | 32                   |
| Original Points Count                           | 32768                | Owner                         | usbodlab                                       | Points Count           | 32768                |
| Receiver Gain                                   | 161.30               | SW(cyclical) (Hz)             | 10330.58                                       | Solvent                | DMSO-d6              |
| Spectrum Type                                   | STANDARD             | Sweep Width (Hz)              | 10330.26                                       | Temperature (degree C) | 27.160               |
|                                                 |                      |                               |                                                | Pulse Sequence         | zg30                 |
|                                                 |                      |                               |                                                | Spectrum Offset (Hz)   | 3088.5571            |

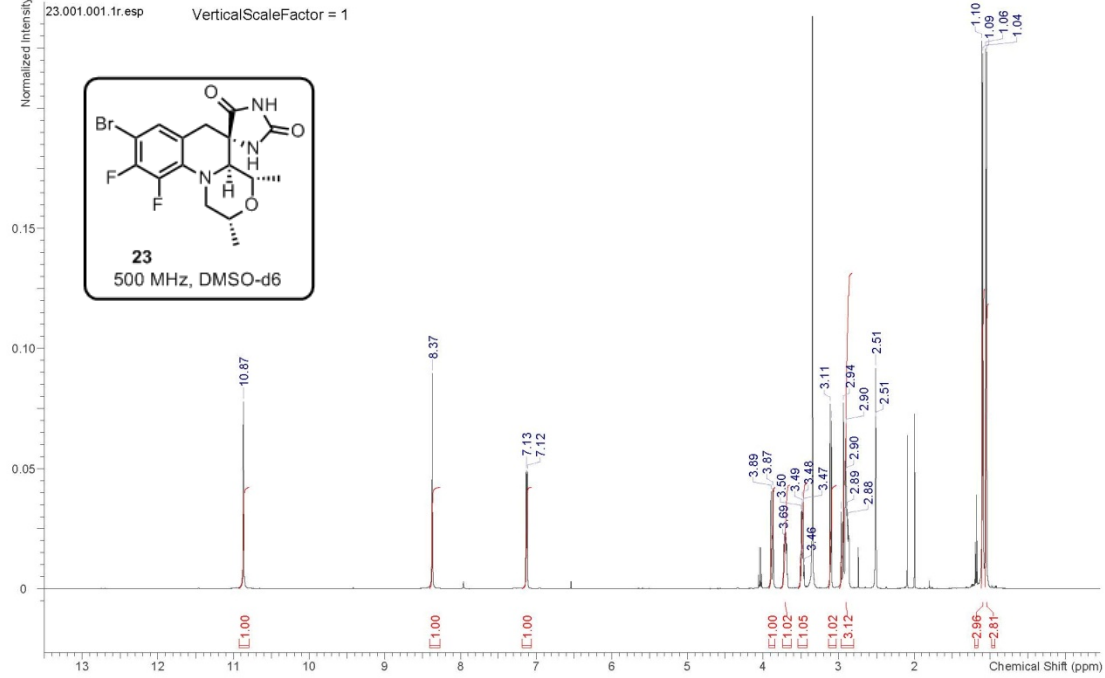

- 173.55
- 155.60
- 148.14
- 146.35
- 146.23
- 140.65
- 138.71
- 138.14
- 133.14
- 125.49
- 121.84
- 94.92
- 94.78
- 72.60
- 71.14
- 66.25
- 62.56
- 55.83
- 55.76
- 37.19
- 36.18
- 24.25
- 23.66
- 18.28
- 18.09

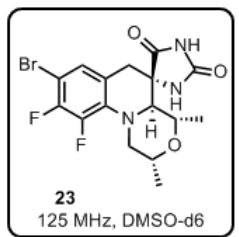

```

NAME EN07754-6534
EXPNO 4
PROCNO 1
Date_ 20150903
Time 10.35
INSTRUM spect
PROBHD 5 mm CPQNP 1H/
PULPROG zgpg30
TD 65418
SOLVENT DMSO
NS 1024
DS 4
SWH 30030.029 Hz
FIDRES 0.459048 Hz
AQ 1.0892597 sec
RG 3649.1
DW 16.650 usec
DE 35.00 usec
TE 300.2 K
D1 2.00000000 sec
d11 0.03000000 sec
DELTA 1.89999998 sec
TD0 1

===== CHANNEL f1 =====
NUC1 13C
P1 12.00 usec
PL1 2.20 dB
SFO1 125.7703643 MHz

===== CHANNEL f2 =====
CPDPRG2 waltz16
NUC2 1H
PCPD2 80.00 usec
PL2 1.20 dB
PL12 15.74 dB
PL13 15.89 dB
SFO2 500.1320005 MHz
SI 32768
SF 125.7578519 MHz
WDW EM
SSB 0
LB 1.00 Hz
GB 0
PC 1.40
    
```

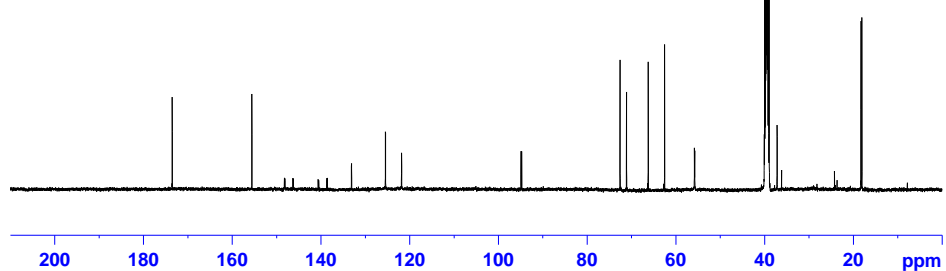

| OriginalDateForRelativeTime 2015-08-01T01:05:04 |                      | Number of Nuclei  |                                               | 0 F's                  |                      |
|-------------------------------------------------|----------------------|-------------------|-----------------------------------------------|------------------------|----------------------|
| Acquisition Time (sec)                          | 0.6554               | Comment           | F19CPD DMSO (C:\Bruker\TOPSPIN1.3)\friones 30 | Date                   | 01 Aug 2015 01:05:04 |
| Date Stamp                                      | 01 Aug 2015 01:05:04 | File Name         | C:\Users\kmmw459\Desktop\OL-NMR\23\pdata\11r  |                        |                      |
| Frequency (MHz)                                 | 470.59               | Nucleus           | 19F                                           | Number of Transients   | 8                    |
| Original Points Count                           | 65536                | Owner             | usbodlab                                      | Points Count           | 65536                |
| Receiver Gain                                   | 3649.10              | SW(cyclical) (Hz) | 100000.00                                     | Solvent                | DMSO-d6              |
| Spectrum Type                                   | STANDARD             | Sweep Width (Hz)  | 99998.48                                      | Temperature (degree C) | 27.160               |
|                                                 |                      |                   |                                               | Pulse Sequence         | zgf1gqn              |
|                                                 |                      |                   |                                               | Spectrum Offset (Hz)   | 0.0164               |

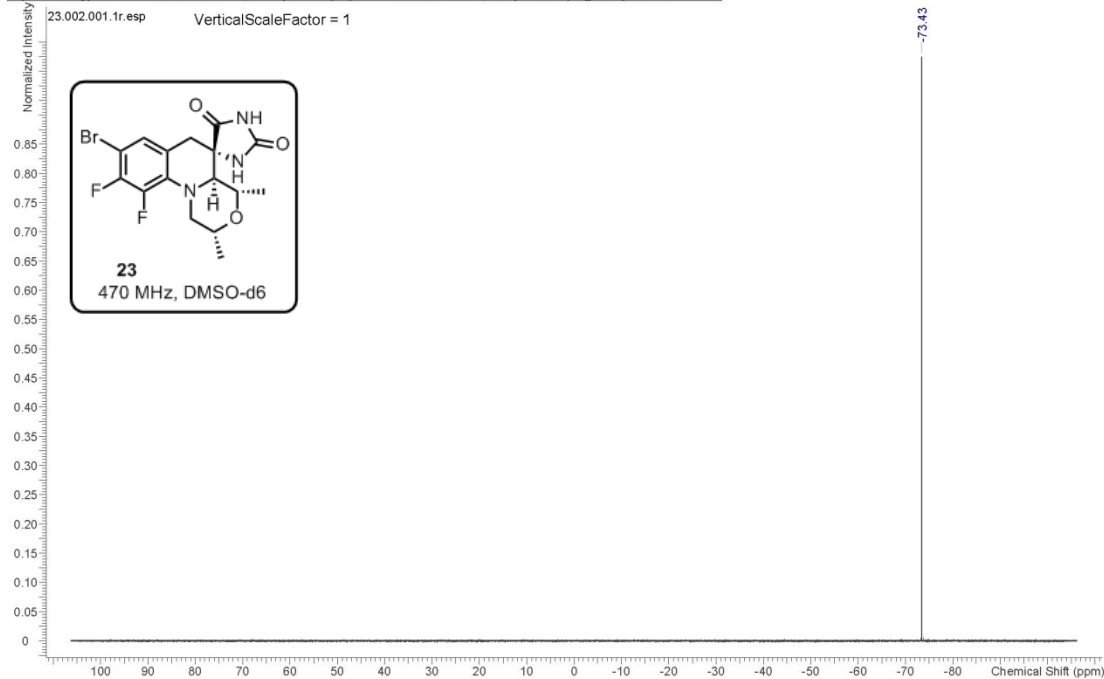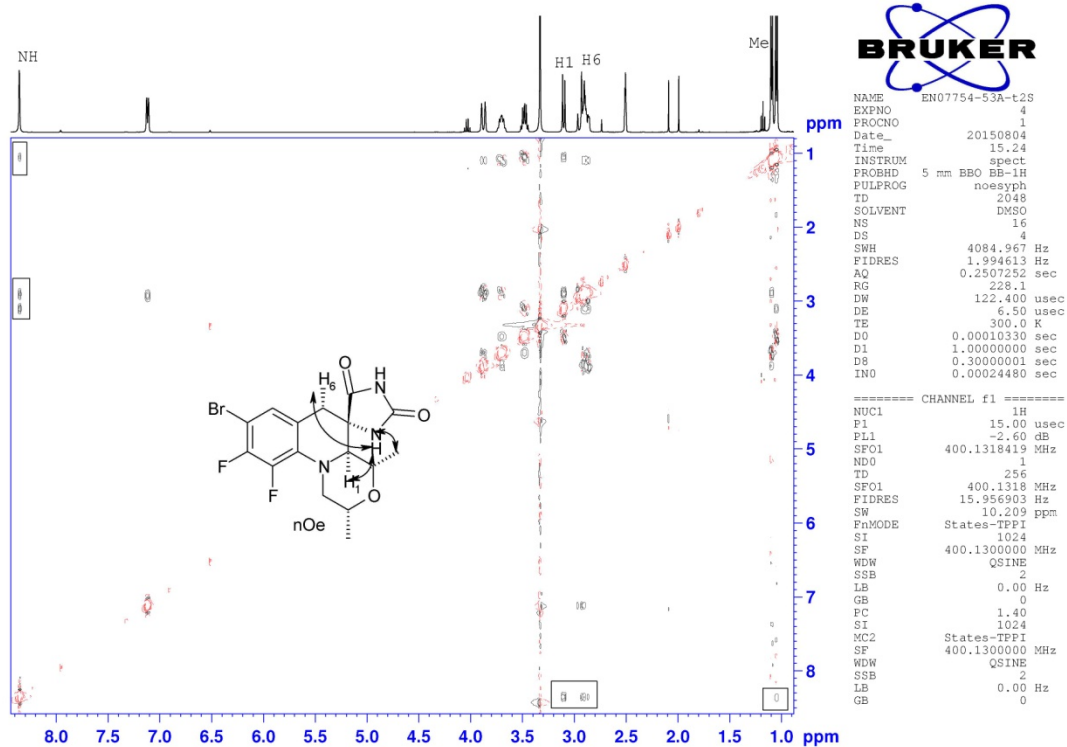

|                             |                                                                                 |                        |             |                                   |                 |                       |          |
|-----------------------------|---------------------------------------------------------------------------------|------------------------|-------------|-----------------------------------|-----------------|-----------------------|----------|
| OriginalDateForRelativeTime | 2015-08-31T11:49:20                                                             | Multipliers            | Integrals   | Sum                               | 0.00            | Number of Nuclei      | 0 H's    |
| Acquisition Time (sec)      | 3.1719                                                                          | Comment                | PROTON DMSO | (C:\Bruker\TOPSPIN1.3)\friones 35 | Date            | 31 Aug 2015 11:49:20  |          |
| Date Stamp                  | 31 Aug 2015 11:49:20                                                            |                        |             |                                   |                 |                       |          |
| File Name                   | \netapp2\nmr_archive\GHP_B00_500\cryo\data\friones\nmr\EN07754-7064\1\data\1\1r |                        |             |                                   | Frequency (MHz) | 500.13                |          |
| Nucleus                     | <sup>1</sup> H                                                                  | Number of Transients   | 32          | Origin                            | spect           | Original Points Count | 32768    |
| Owner                       | usbodlab                                                                        | Points Count           | 32768       | Pulse Sequence                    | zg30            | Receiver Gain         | 203.20   |
| SW(cyclical) (Hz)           | 10330.58                                                                        | Solvent                | DMSO-d6     | Spectrum Offset (Hz)              | 3088.5571       | Spectrum Type         | STANDARD |
| Sweep Width (Hz)            | 10330.26                                                                        | Temperature (degree C) | 27.160      |                                   |                 |                       |          |

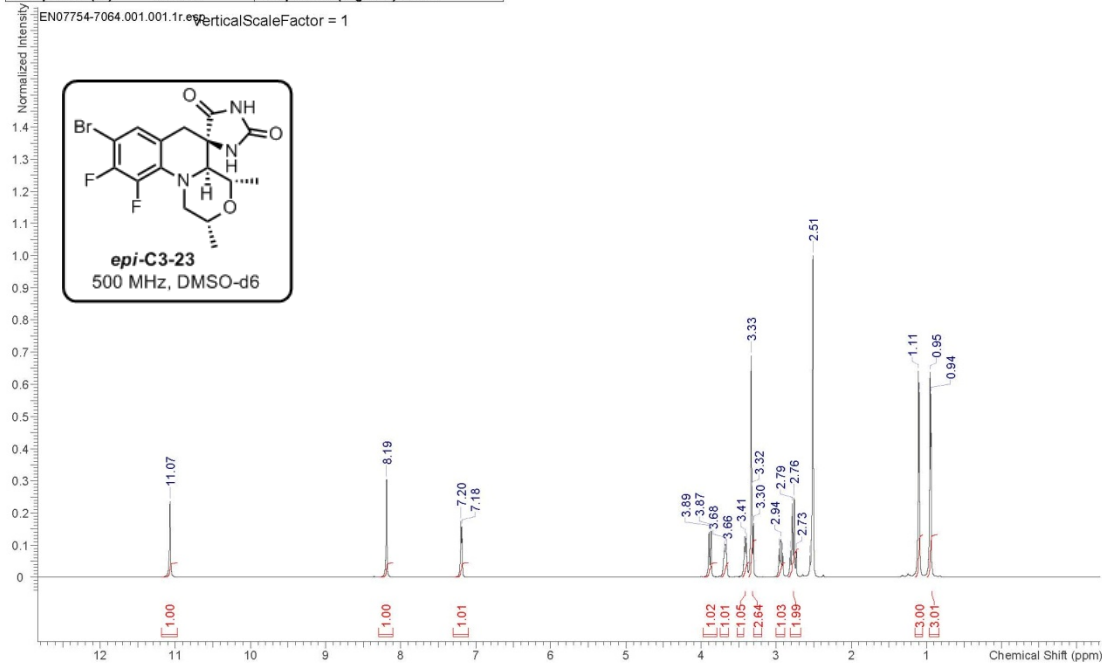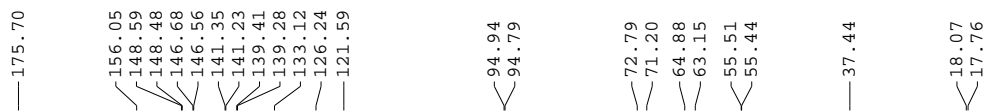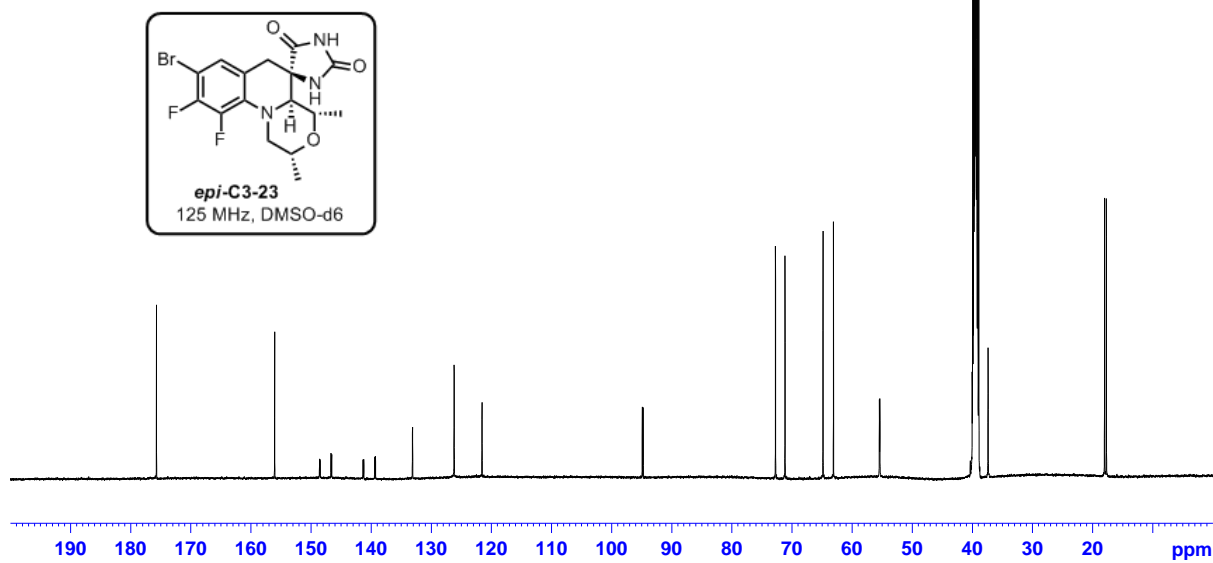

| OriginalDateForRelativeTime 2015-08-01T08:22:24 |                      | Number of Nuclei  |                                                        | 0 F's                  |                      |
|-------------------------------------------------|----------------------|-------------------|--------------------------------------------------------|------------------------|----------------------|
| Acquisition Time (sec)                          | 0.6554               | Comment           | F19CPD DMSO (C:\Bruker\TOPSPIN1.3) fbriones 31         | Date                   | 01 Aug 2015 08:22:24 |
| Date Stamp                                      | 01 Aug 2015 08:22:24 | File Name         | C:\Users\krmwk459\Desktop\OL-NMR\23-epi-c3\2pdata\111r |                        |                      |
| Frequency (MHz)                                 | 470.59               | Nucleus           | 19F                                                    | Number of Transients   | 8                    |
| Original Points Count                           | 65536                | Owner             | usbodlab                                               | Points Count           | 65536                |
| Receiver Gain                                   | 3649.10              | SW(cyclical) (Hz) | 100000.00                                              | Solvent                | DMSO-d6              |
| Spectrum Type                                   | STANDARD             | Sweep Width (Hz)  | 99998.48                                               | Temperature (degree C) | 27.160               |
|                                                 |                      |                   |                                                        | Spectrum Offset (Hz)   | 0.0164               |

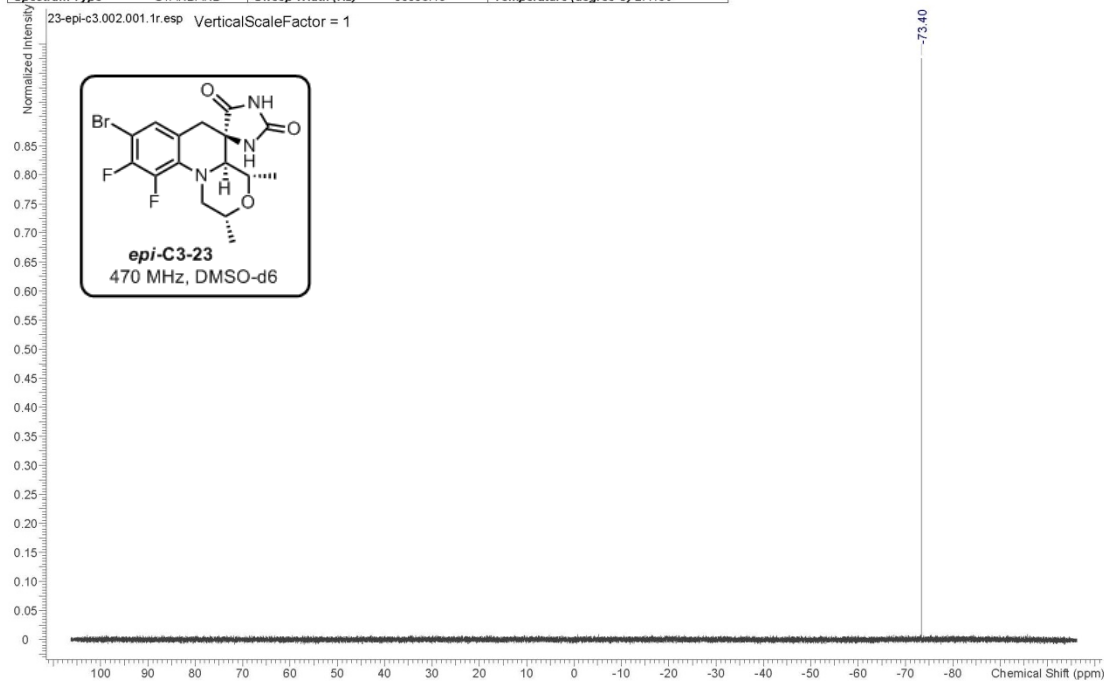

Noesy

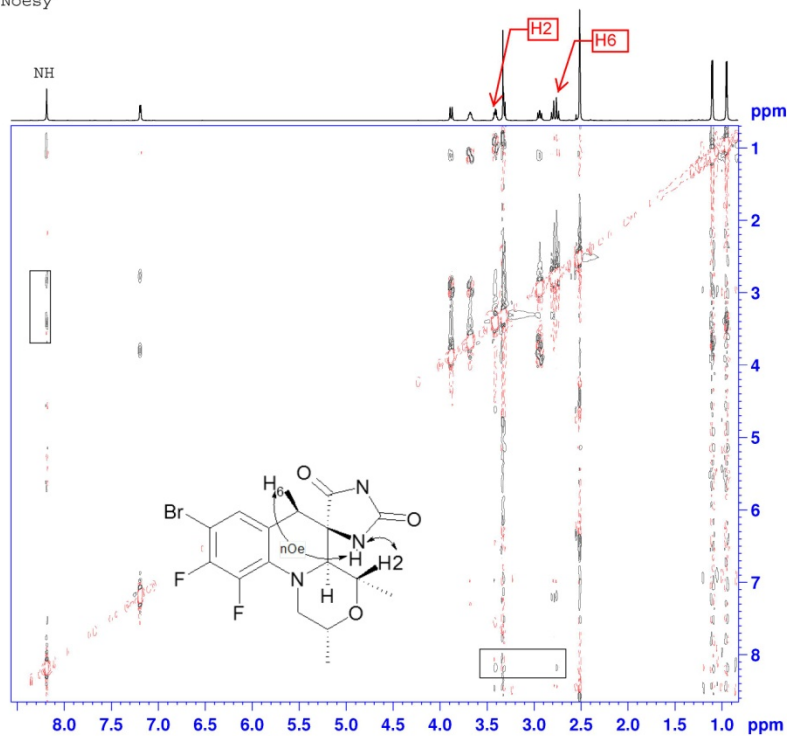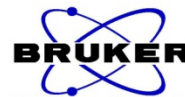

```

NAME      EN07754-91
EXPNO     3
PROCNO    1
Date_     20150901
Time      10.12
INSTRUM   spect
PROBHD    5 mm TCI 1H-13
PULPROG   noesyph
TD         2048
SOLVENT   DMSO
NS         8
DS         4
SWH        6127.451 Hz
FIDRES     2.991920 Hz
AQ         0.1671668 sec
RG         144
DW         81.600 usec
DE         30.00 usec
TE         300.1 K
DO         0.00007147 sec
D1         2.00000000 sec
D8         0.30000001 sec
INO        0.00016330 sec

```

```

===== CHANNEL f1 =====
NUC1      1H
P1         8.00 usec
PL1        4.70 dB
PL1W       5.87285280 W
SFO1       599.8032989 MHz
ND0         1
TD         236
SFO1       599.8033 MHz
FIDRES     25.946711 Hz
SW         10.209 ppm
F1MODE     States-TPPI
SI         2048
SF         599.8000000 MHz
WDW        QSINE
SSB         2
LB         0.00 Hz
GB         0
PC         1.40
SI         2048
MC2        States-TPPI
SF         599.8000000 MHz
WDW        QSINE
SSB         2
LB         0.00 Hz
GB         0

```

| OriginalDateForRelativeTime 2014-12-08T16:41:20 |                      | Multiplets Integrals Sum 0.00 |                                                 | Number of Nuclei 0 H's |                      |
|-------------------------------------------------|----------------------|-------------------------------|-------------------------------------------------|------------------------|----------------------|
| Acquisition Time (sec)                          | 0.9961               | Comment                       | proton_longdelay_QNP_16 CDCl3 (C'u) fbriones 33 | Date                   | 08 Dec 2014 16:41:20 |
| Date Stamp                                      | 08 Dec 2014 16:41:20 | File Name                     | C:\Users\kmmw459\Desktop\OL-NMR8-H1\data\111r   | Origin                 | spect                |
| Frequency (MHz)                                 | 400.13               | Nucleus                       | <sup>1</sup> H                                  | Number of Transients   | 16                   |
| Original Points Count                           | 8192                 | Owner                         | usbodlab                                        | Points Count           | 32768                |
| Receiver Gain                                   | 181.00               | SW(cyclical) (Hz)             | 8223.68                                         | Solvent                | CHLOROFORM-d         |
| Spectrum Offset (Hz)                            | 2432.8806            | Spectrum Type                 | STANDARD                                        | Sweep Width (Hz)       | 8223.43              |
|                                                 |                      |                               |                                                 | Temperature (degree C) | 26.960               |

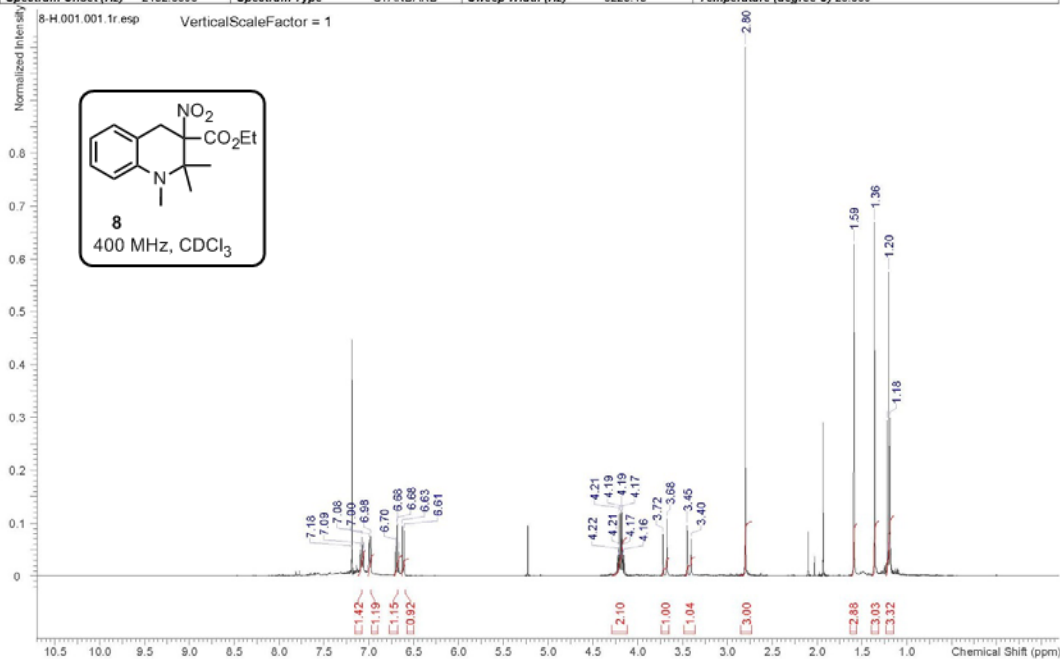

| OriginalDateForRelativeTime 2014-12-08T17:11:12 |                      | Number of Nuclei 0 C's |                                               |
|-------------------------------------------------|----------------------|------------------------|-----------------------------------------------|
| Acquisition Time (sec)                          | 1.3664               | Comment                | carbon_QNP_256 CDCl3 (C'u) fbriones 27        |
| Date Stamp                                      | 08 Dec 2014 17:11:12 | File Name              | C:\Users\kmmw459\Desktop\OL-NMR8-C1\data\111r |
| Frequency (MHz)                                 | 100.62               | Nucleus                | <sup>13</sup> C                               |
| Original Points Count                           | 32768                | Owner                  | usbodlab                                      |
| Receiver Gain                                   | 18380.40             | SW(cyclical) (Hz)      | 23980.81                                      |
| Spectrum Offset (Hz)                            | 10062.3730           | Spectrum Type          | STANDARD                                      |
|                                                 |                      | Sweep Width (Hz)       | 23980.08                                      |
|                                                 |                      | Temperature (degree C) | 28.360                                        |

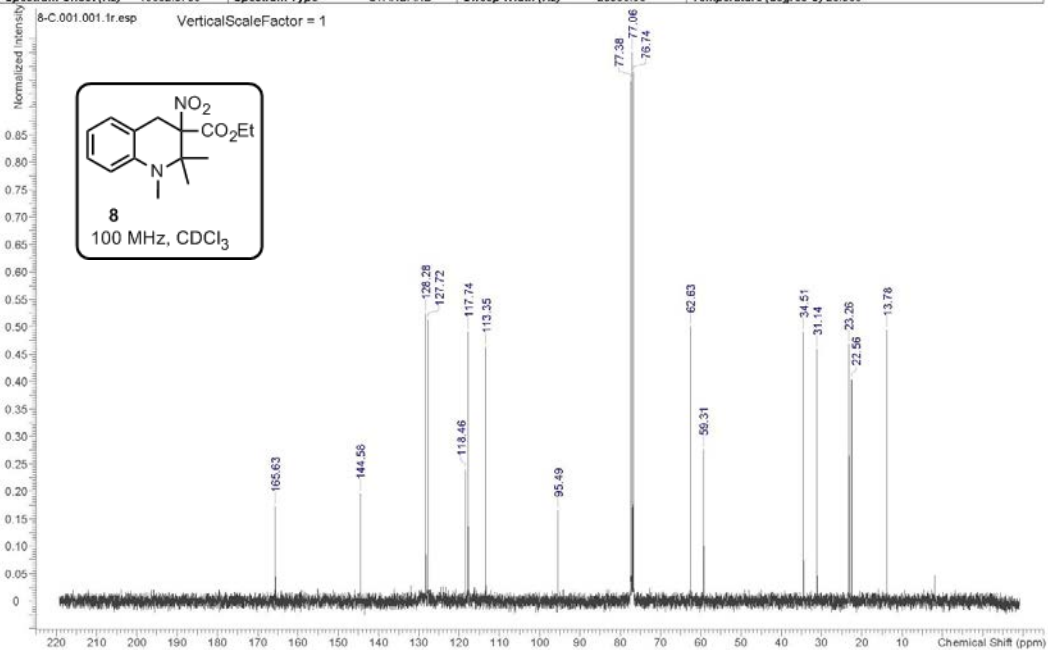

| OriginalDateForRelativeTime 2014-10-24T13:25:20 |                      | Multiplets Integrals Sum 0.00 |                                                     | Number of Nuclei 0 H's |                      |
|-------------------------------------------------|----------------------|-------------------------------|-----------------------------------------------------|------------------------|----------------------|
| Acquisition Time (sec)                          | 0.9961               | Comment                       | proton_longdelay_QNP_16 CDCl3 (C1u) fbriones 6      | Date                   | 24 Oct 2014 13:25:20 |
| Date Stamp                                      | 24 Oct 2014 13:25:20 | File Name                     | C:\Users\krmwk459\Desktop\OL-NMR\25-H\1\pdata\1\11r | Origin                 | spect                |
| Frequency (MHz)                                 | 400.13               | Nucleus                       | 1H                                                  | Number of Transients   | 16                   |
| Original Points Count                           | 8192                 | Owner                         | usbodlab                                            | Points Count           | 32768                |
| Receiver Gain                                   | 128.00               | SW(cyclical) (Hz)             | 8223.68                                             | Solvent                | CHLOROFORM-d         |
| Spectrum Offset (Hz)                            | 2471.0088            | Spectrum Type                 | STANDARD                                            | Sweep Width (Hz)       | 8223.43              |
|                                                 |                      |                               |                                                     | Temperature (degree C) | 26.960               |

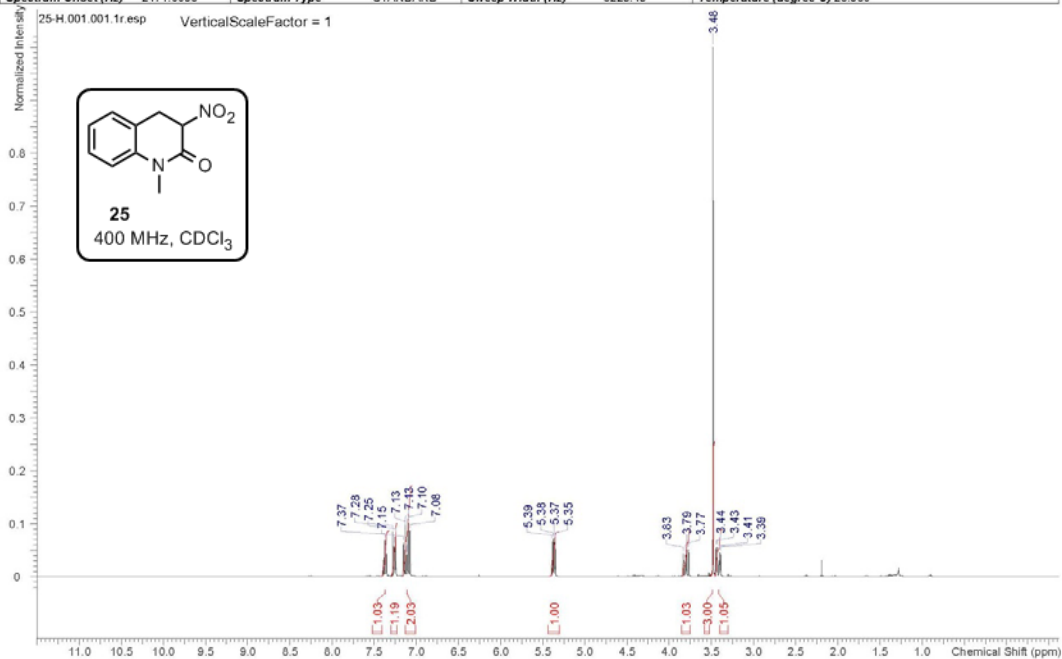

| OriginalDateForRelativeTime 2014-10-24T13:53:04 |                      | Number of Nuclei 0 C's |                                                     |
|-------------------------------------------------|----------------------|------------------------|-----------------------------------------------------|
| Acquisition Time (sec)                          | 1.3664               | Comment                | carbon_QNP_256 CDCl3 (C1u) fbriones 6               |
| Date Stamp                                      | 24 Oct 2014 13:53:04 | File Name              | C:\Users\krmwk459\Desktop\OL-NMR\25-C\1\pdata\1\11r |
| Frequency (MHz)                                 | 100.62               | Nucleus                | 13C                                                 |
| Original Points Count                           | 32768                | Owner                  | usbodlab                                            |
| Receiver Gain                                   | 14596.50             | SW(cyclical) (Hz)      | 23980.61                                            |
| Spectrum Offset (Hz)                            | 10062.3730           | Spectrum Type          | STANDARD                                            |
|                                                 |                      | Solvent                | CHLOROFORM-d                                        |
|                                                 |                      | Sweep Width (Hz)       | 23980.06                                            |
|                                                 |                      | Temperature (degree C) | 27.560                                              |

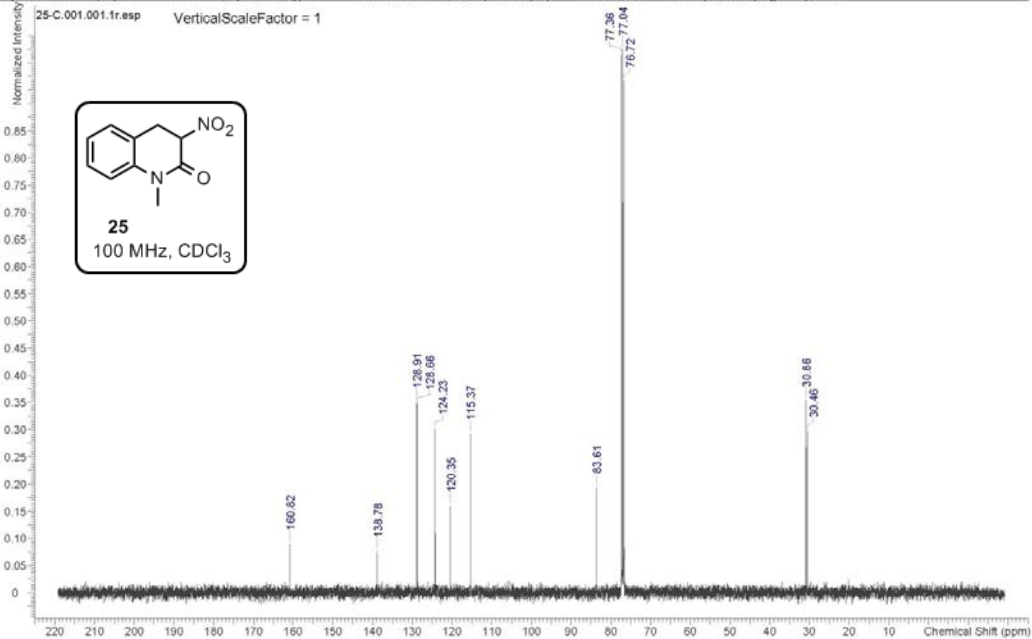

| OriginalDateForRelativeTime 2015-08-19T23:20:32 |                      | Number of Nuclei  |                                                     | 0 C's                |              |                        |                      |
|-------------------------------------------------|----------------------|-------------------|-----------------------------------------------------|----------------------|--------------|------------------------|----------------------|
| Acquisition Time (sec)                          | 1.6219               | Comment           | A3 300MHz dept                                      | ONP_2000 CDCl3 (C:u) | fbriones 48  | Date                   | 19 Aug 2015 23:20:32 |
| Date Stamp                                      | 19 Aug 2015 23:20:32 | File Name         | C:\Users\krmw459\Desktop\OL-NMR\25-dept\1\data\1\1r |                      |              |                        |                      |
| Frequency (MHz)                                 | 75.46                | Nucleus           | 13C                                                 | Number of Transients | 2000         | Origin                 | spect                |
| Original Points Count                           | 32768                | Owner             | usbodlab                                            | Points Count         | 32768        | Pulse Sequence         | dept135              |
| Receiver Gain                                   | 16384.00             | SW(cyclical) (Hz) | 17985.61                                            | Solvent              | CHLOROFORM-d |                        |                      |
| Spectrum Offset (Hz)                            | 7547.9526            | Spectrum Type     | DEPT135                                             | Sweep Width (Hz)     | 17985.06     | Temperature (degree C) | 26.960               |

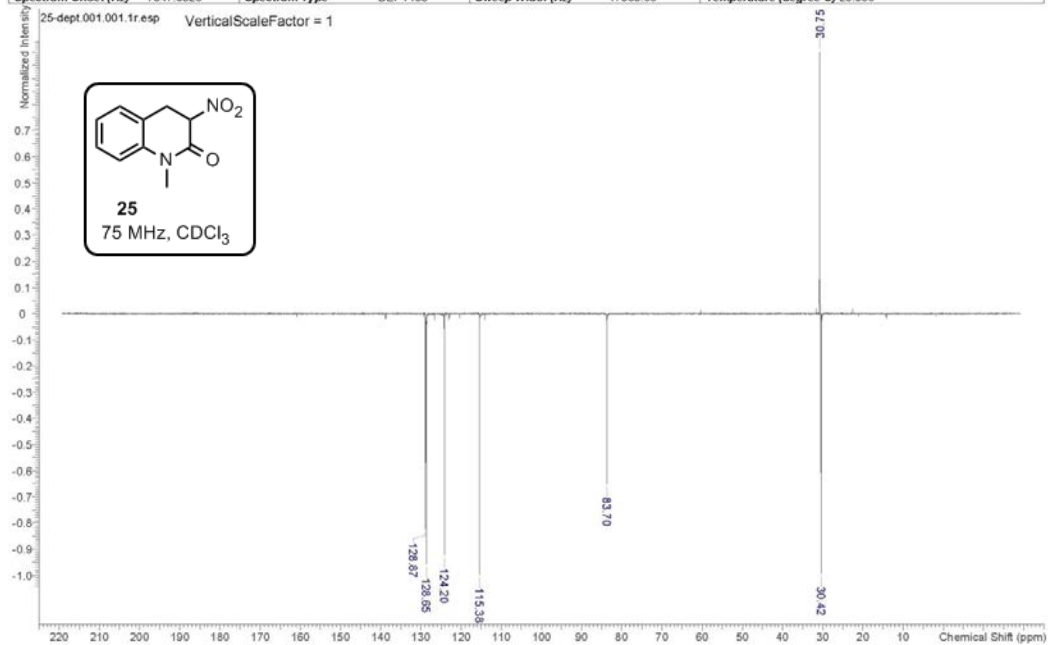

Supplement: c6cc03600g1.pdf [file c6cc03600g1.pdf]
